# Supplementary material for: Global water level variability observed after the Hunga Tonga-Hunga Ha'apai volcanic tsunami of 2022
Source: Copernicus journal article supplement (doi:10.5194/os-19-517-2023), 2023-04-27
Supplement: Supplementary file 1 [file os-19-517-2023-supplement.pdf]

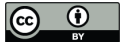

*Supplement of*

## **Global water level variability observed after the Hunga Tonga-Hunga Ha’apai volcanic tsunami of 2022**

**Adam T. Devlin et al.**

*Correspondence to:* Jiayi Pan ([panj@cuhk.edu.hk](mailto:panj@cuhk.edu.hk))

The copyright of individual parts of the supplement might differ from the article licence.

## TABLE OF CONTENTS

|    |                                                                                                |    |
|----|------------------------------------------------------------------------------------------------|----|
| 22 |                                                                                                |    |
| 23 |                                                                                                |    |
| 24 | <i>Supplementary Figures S1 to S19</i>                                                         |    |
| 25 | <b>Figure S1</b> Map inventory of stations where both the VMT and the oceanic tsunami were not |    |
| 26 | clearly observed...                                                                            | 3  |
| 27 | <b>Figure S2</b> Estimates of different velocity parameters.                                   | 4  |
| 28 | <b>Figure S3</b> Maximum residual water levels...                                              | 5  |
| 29 | <b>Figure S4</b> Time of maximum overall residual water level (hours after eruption).          | 6  |
| 30 | <b>Figure S5</b> Maximum residual water level due to VMT alone.                                | 7  |
| 31 | <b>Figure S6</b> Arrival time of the VMT                                                       | 8  |
| 32 | <b>Figure S7</b> Maximum negative (minimum) overall residual water levels...                   | 9  |
| 33 | <b>Figure S8</b> Time of maximum negative (minimum) water level...                             | 10 |
| 34 | <b>Figure S9</b> Time difference between VMT arrival and time of overall maximum...            | 11 |
| 35 | <b>Figure S10</b> Time difference between VMT arrival and time of overall minimum...           | 12 |
| 36 | <b>Figure S11</b> Expanded view of the Caribbean Sea...                                        | 13 |
| 37 | <b>Figure S12</b> Expanded view of the Mediterranean Sea...                                    | 14 |
| 38 | <b>Figure S13</b> WL response to the volcanic meteotsunami and oceanic tsunami                 |    |
| 39 | at NDBC deep-water buoys in the Central/Southwest Pacific.                                     | 15 |
| 40 | <b>Figure S14</b> WL response to the volcanic meteotsunami and oceanic tsunami                 |    |
| 41 | at NDBC deep-water buoys in the Western Pacific.                                               | 16 |
| 42 | <b>Figure S15</b> WL response to the volcanic meteotsunami and oceanic tsunami                 |    |
| 43 | at NDBC deep-water buoys in the Northwest Pacific.                                             | 17 |
| 44 | <b>Figure S16</b> WL response to the volcanic meteotsunami and oceanic tsunami                 |    |
| 45 | at NDBC deep-water buoys in the Northern Pacific.                                              | 18 |
| 46 | <b>Figure S17</b> WL response to the volcanic meteotsunami and oceanic tsunami                 |    |
| 47 | at NDBC deep-water buoys in the Northeast Pacific.                                             | 19 |
| 48 | <b>Figure S18</b> WL response to the volcanic meteotsunami and oceanic tsunami                 |    |
| 49 | at NDBC deep-water buoys in the Southeast Pacific.                                             | 20 |
| 50 | <b>Figure S19</b> Individual comparisons of energy decay time scales                           |    |
| 51 | at Northern Pacific locations.                                                                 | 21 |
| 52 |                                                                                                |    |
| 53 | <i>Supplementary Tables S1 to S8</i>                                                           |    |
| 54 | <b>Table S1</b> Stations used for analysis in this study                                       | 22 |
| 55 | <b>Table S2</b> Air pressure ( $P_A$ ) stations employed.                                      | 31 |
| 56 | <b>Table S3</b> Inventory of “bad” stations where no tsunami could be clearly observed.        | 35 |
| 57 | <b>Table S4</b> Maximum water level parameters.                                                | 51 |
| 58 | <b>Table S5</b> First arrival of the VMT estimated from water level records.                   | 59 |
| 59 | <b>Table S6</b> Maximum water level parameters.                                                | 67 |
| 60 | <b>Table S7</b> Maximum VMT-induced WL observed at deep-water buoys.                           | 75 |
| 61 | <b>Table S8</b> $\beta$ -factor calculations.                                                  | 76 |
| 62 |                                                                                                |    |

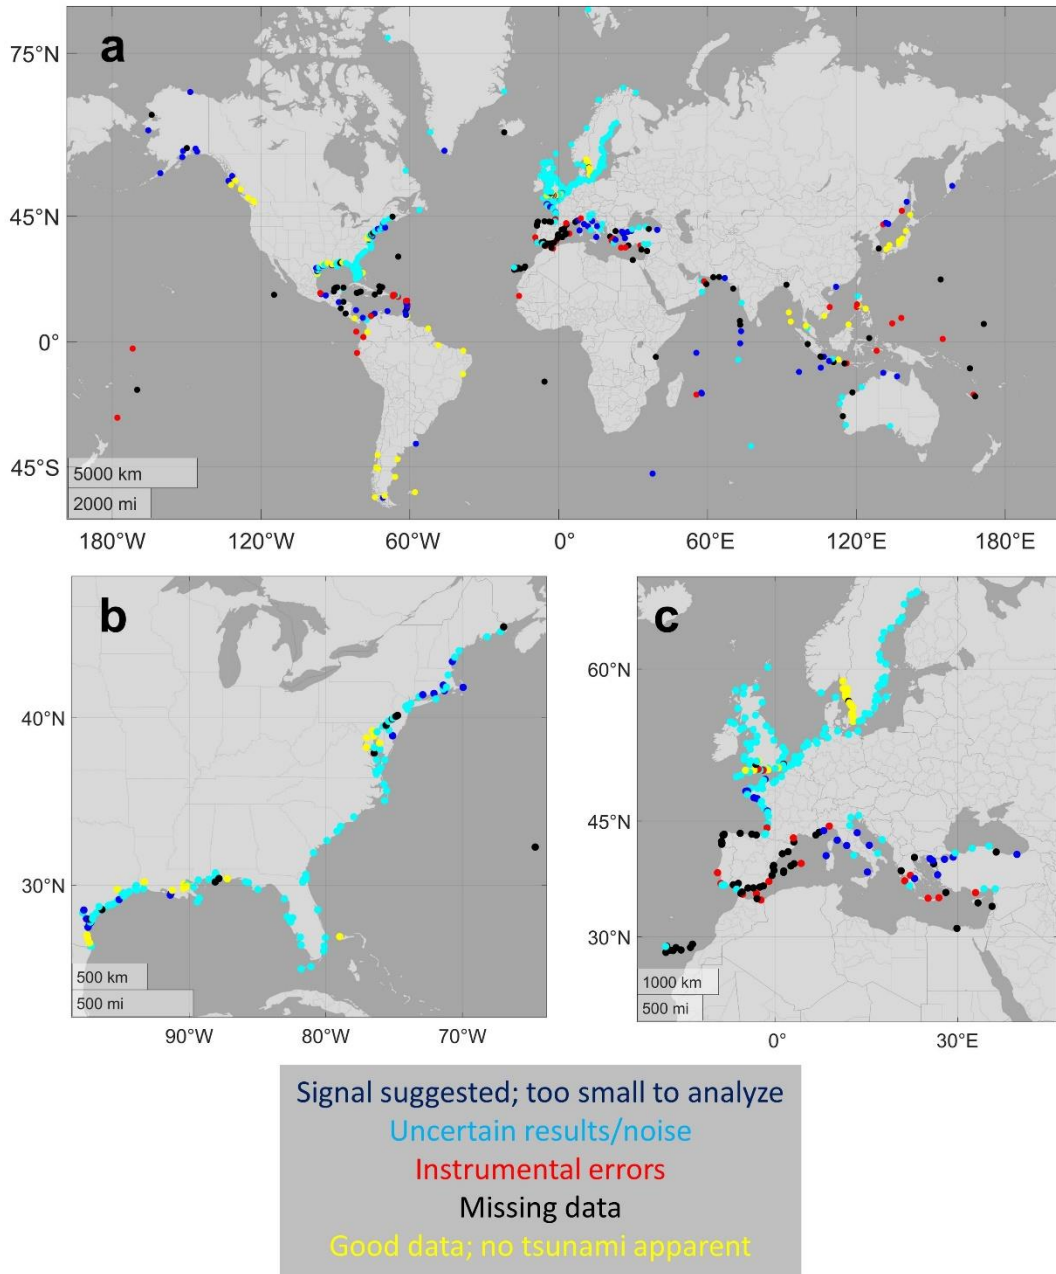

63

64 **Figure S1** Map inventory of stations where both the VMT and the oceanic tsunami were not  
 65 clearly observed or were too small to analyze. (a) Global results; (b) Expanded view of US East  
 66 Coast; (c) Expanded view of Europe. Status categories and colors are: 1) good data with a small  
 67 signal suggested, but too small to analyze (dark blue); 2) good data but uncertain results, either  
 68 due to too much noise, the presence of storms, or under-sampled data, i.e., 5-min or longer time  
 69 resolution (cyan); 3) instrumental errors (red); 4) missing data (black); and 5) good data, but no  
 70 tsunami signal detected (yellow).

71

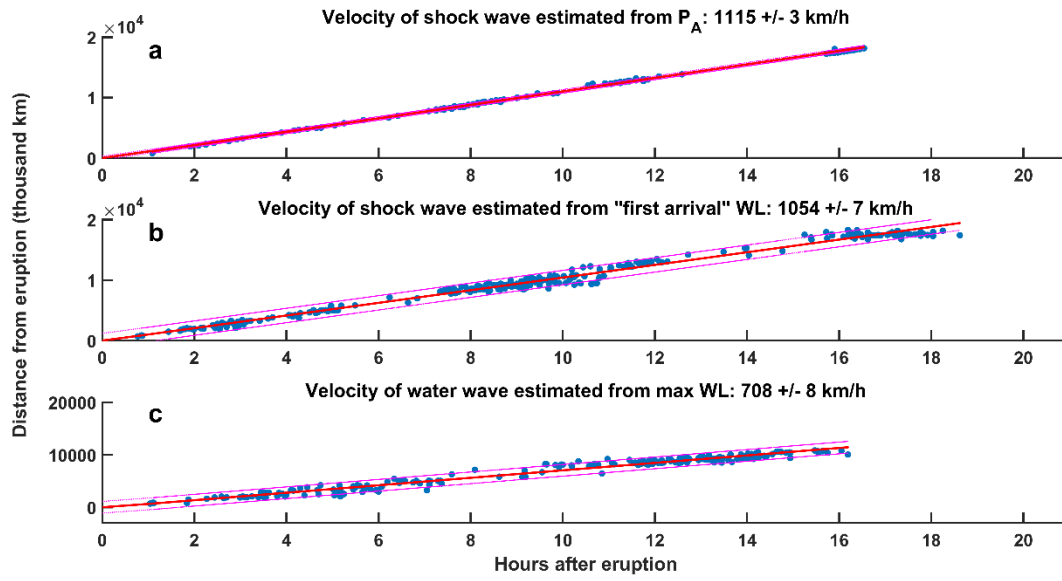

72

73 **Figure S2** Estimates of different velocity parameters. (a) Shockwave velocity from air pressure  
 74 gauges; (b) Shockwave velocity from tide gauges (estimated from “first arrival” WLs of the  
 75 volcanic meteotsunami); (c) Water wave velocity (estimated from arrival time of oceanic  
 76 tsunami). All scatterplots regress distance (km) from the Tonga volcano vs. time of arrival  
 77 (shockwave or water wave; hours since eruption). Slope values and errors from robust regression  
 78 are given.

79

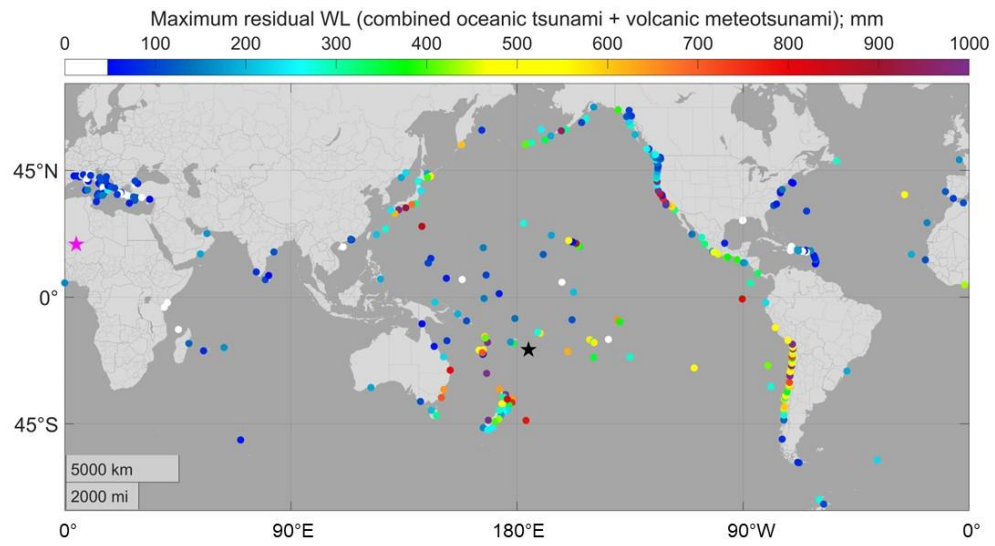

80

81 **Figure S3** Maximum residual water levels after removing tidal signal (combined volcanic  
 82 meteotsunami (VMT) and oceanic tsunami). Expanded view of Fig. 1(a).

83

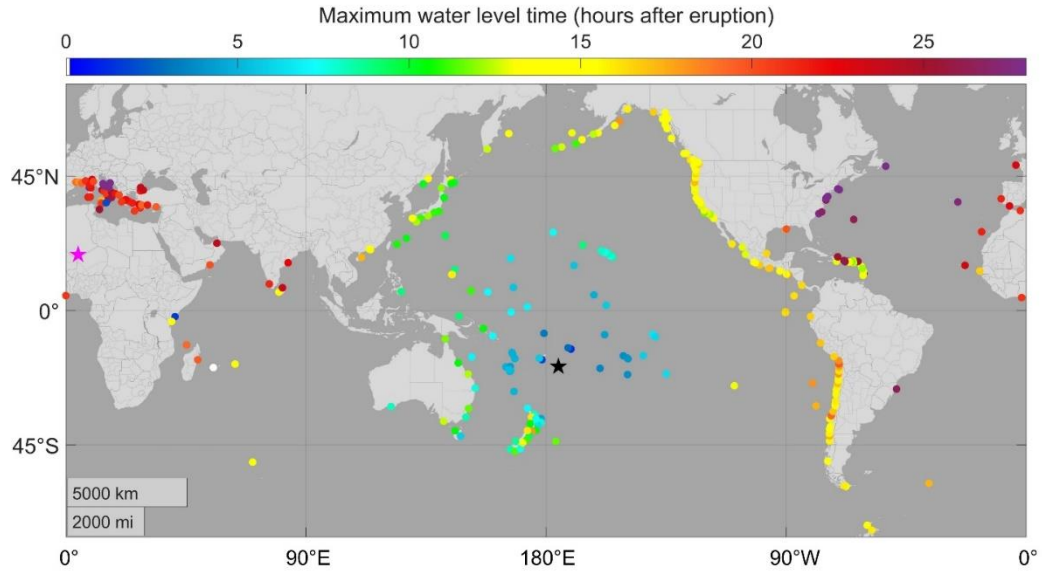

84

85 **Figure S4** Time of maximum overall residual water level (hours after eruption). Expanded view  
 86 of Fig. 1(b). White dots indicate the exact arrival time could not be clearly determined.

87

88

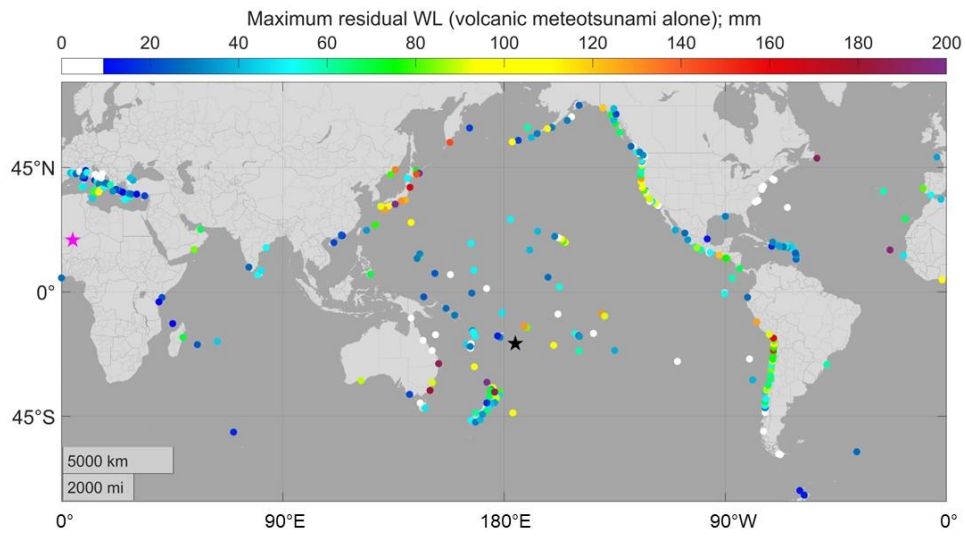

89

90 **Figure S5** Maximum residual water level due to VMT alone. Expanded view of Fig. 1(c).

91

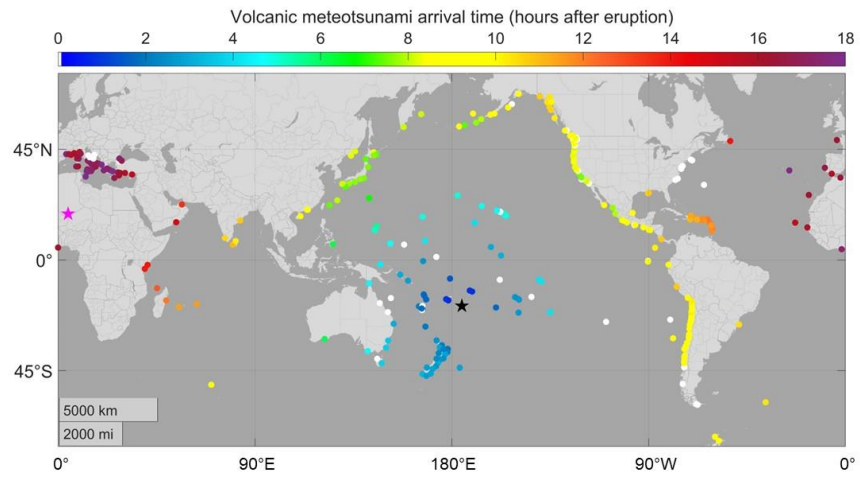

92

93 **Figure S6** Arrival time of the VMT as estimated from water level. Expanded view of Fig. 1(d).  
 94 White dots indicate exact arrival times could not be clearly determined.

95

96



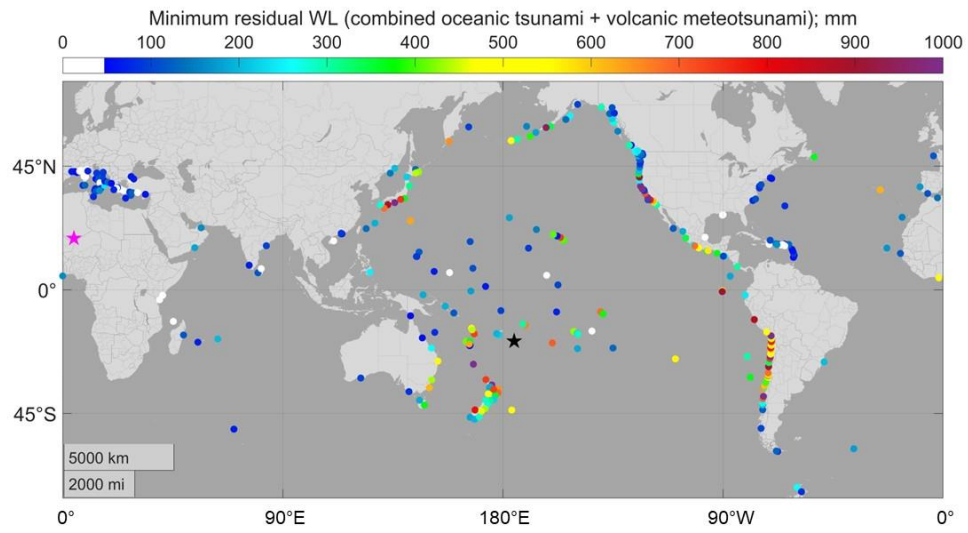

97

98 **Figure S7** Maximum negative (minimum) overall residual water levels (combined VMT and  
 99 oceanic tsunami).

100

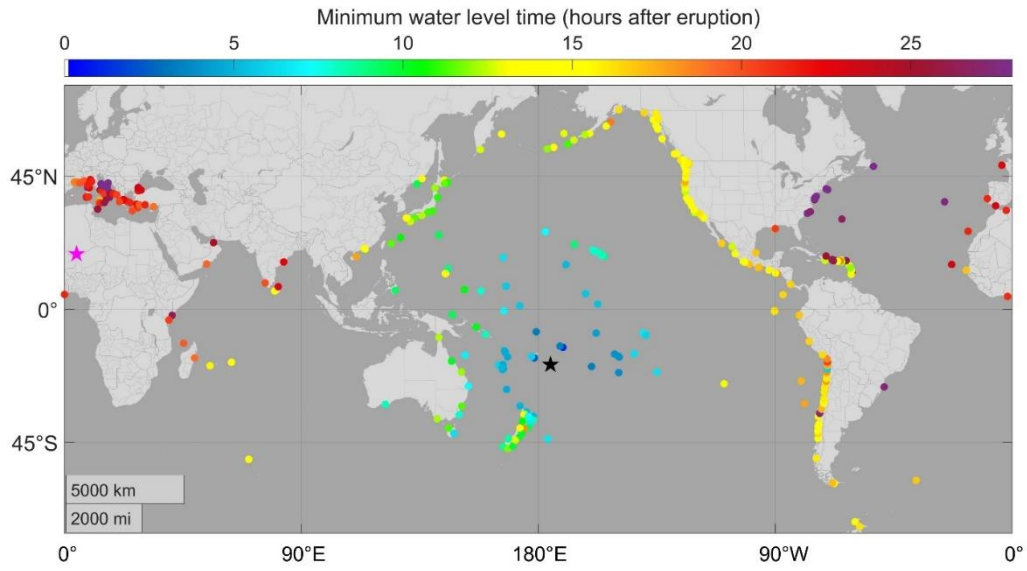

101

102 **Figure S8** Time of maximum negative (minimum) water level (hours after eruption). White dots  
 103 indicate the exact VMT arrival time could not be clearly determined.

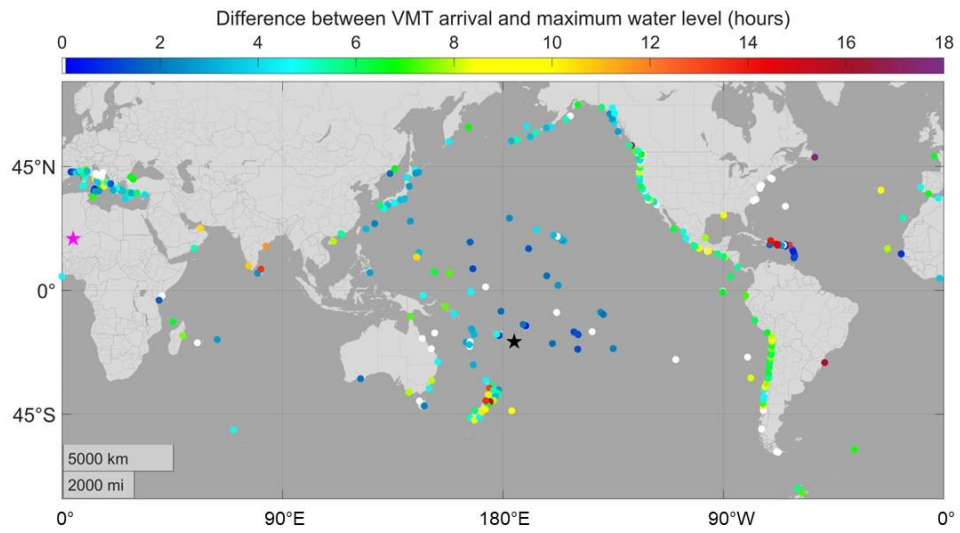

104

105 **Figure S9** Time difference between VMT arrival and time of overall maximum residual water  
 106 level (hours). White dots indicate the exact VMT arrival time could not be clearly determined.

107

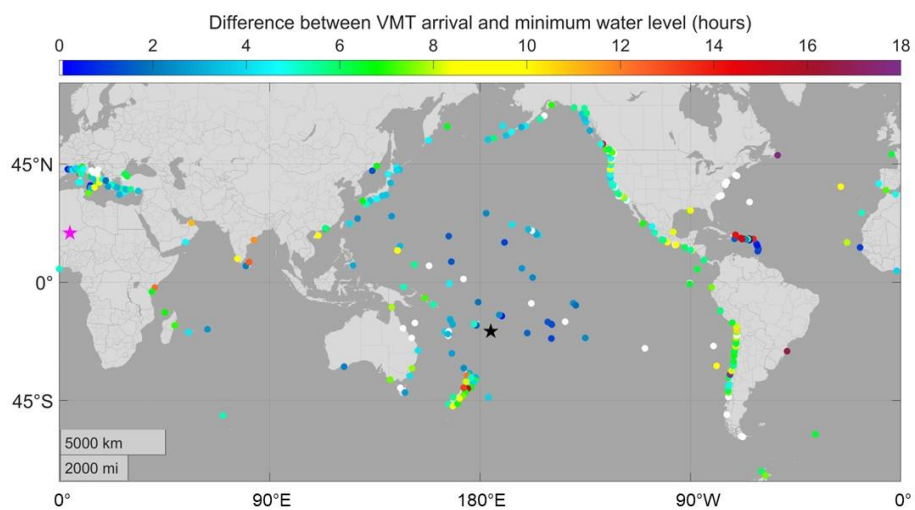

108

109 **Figure S10** Time difference between volcanic meteotsunami arrival and time of overall  
 110 minimum water level (hours). White dots indicate the exact VMT arrival times could not be  
 111 clearly determined.

112

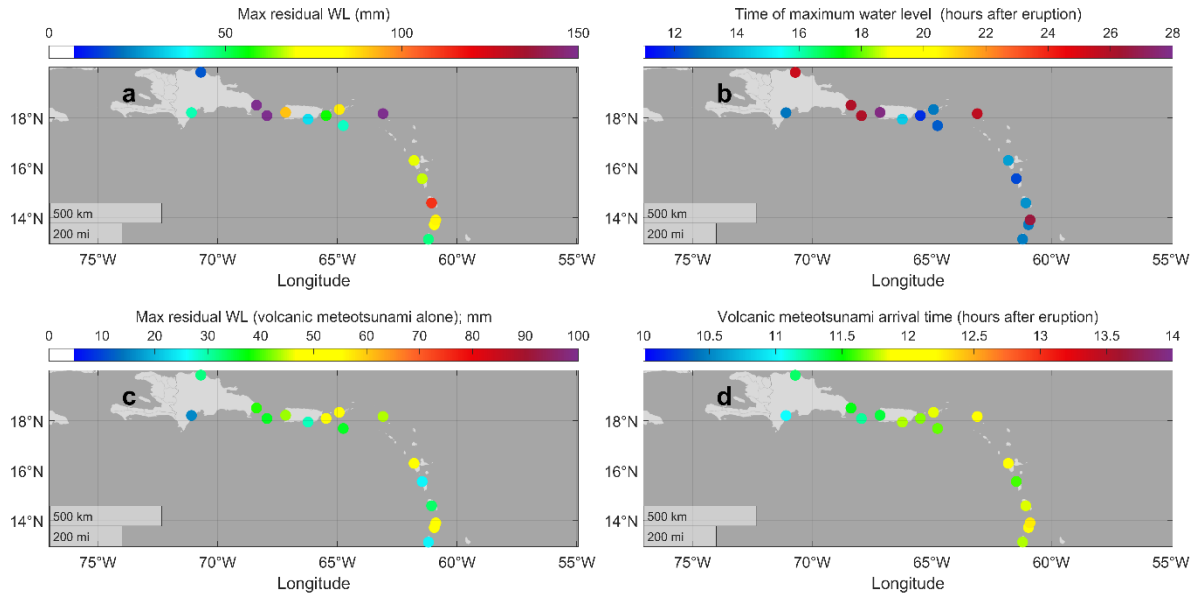

113

114 **Figure S11** Expanded view of the Caribbean Sea (same results as Fig. 1; different scales).

115

116

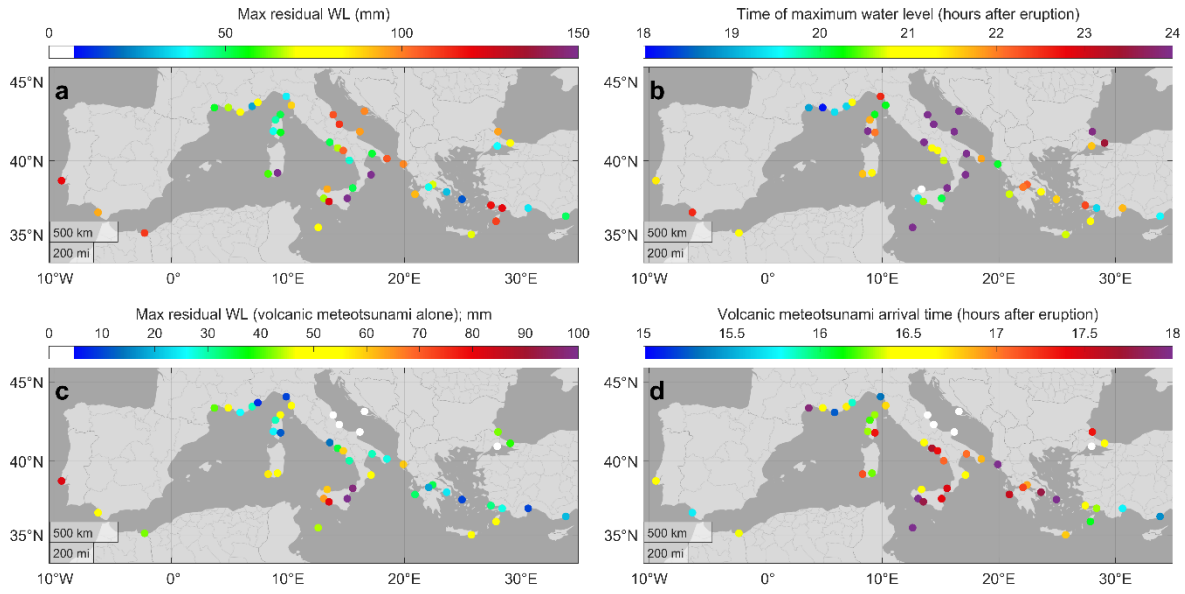

117

118 **Figure S12** Expanded view of the Mediterranean Sea (same results as Fig. 1; different scales).

119

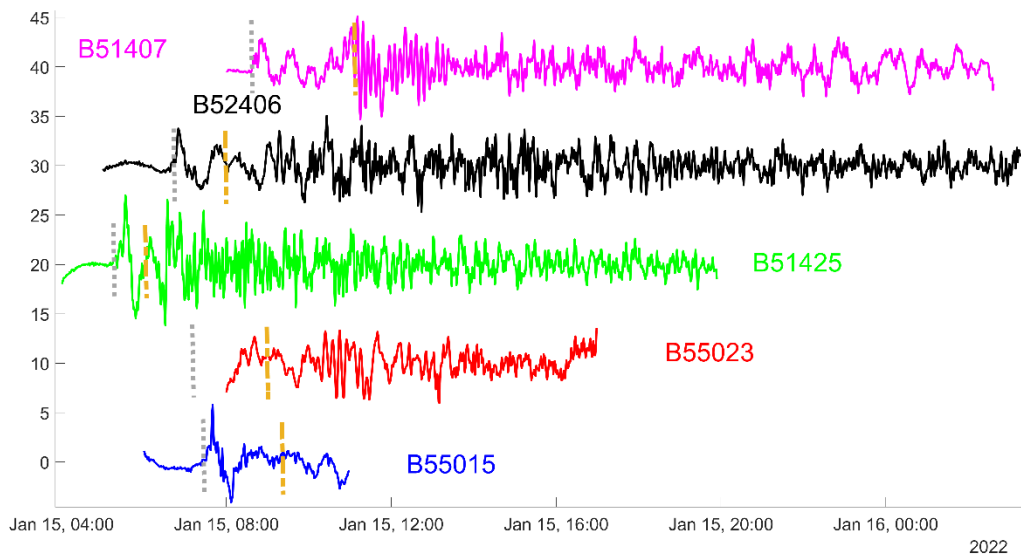

120

121 **Figure S13** WL response to the volcanic meteotsunami and oceanic tsunami at NDBC deep-  
 122 water buoys in the Central/Southwest Pacific. Buoys numbers are official NDBC designations;  
 123 details of each buoy can be found in Table S1, and locations are shown in Figure 2(a). Each buoy  
 124 is offset 10 cm vertically from each other. VMT arrivals are based on a theoretical travel time of  
 125  $1115 \text{ km/hr}^{-1}$  as indicated by grey, dotted vertical lines, and oceanic tsunami arrivals are based  
 126 on an average travel time of  $700 \text{ km/hr}^{-1}$  as indicated by orange, dash-dot vertical lines.

127

128

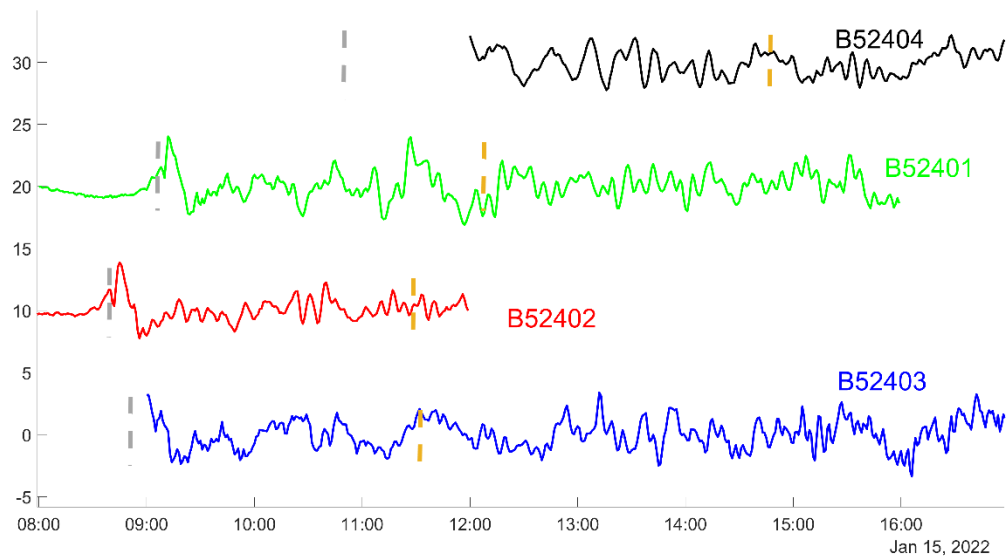

129

130 **Figure S14** WL response to the volcanic meteotsunami and oceanic tsunami at NDBC deep-  
 131 water buoys in the West Pacific. Buoys numbers are official NDBC designations; details of each  
 132 buoy can be found in Table S1, and locations are shown in Figure 2(a). Each buoy is offset 10  
 133 cm vertically from each other. VMT arrivals are based on a theoretical travel time of  $1115 \text{ km/hr}^{-1}$   
 134 <sup>1</sup> as indicated by grey, dashed vertical lines, and oceanic tsunami arrivals are based on an average  
 135 travel time of  $700 \text{ km/hr}^{-1}$  as indicated by orange, dashed vertical lines.

136

137

138



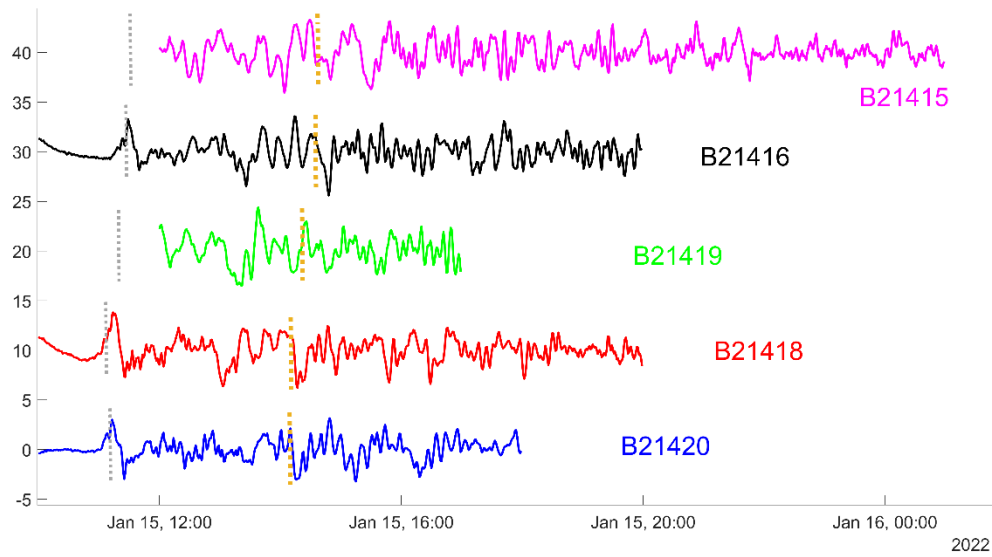

139

140 **Figure S15** WL response to the volcanic meteotsunami and oceanic tsunami at NDBC deep-  
 141 water buoys in the Northwest Pacific. Buoys numbers are official NDBC designations; details of  
 142 each buoy can be found in Table S1, and locations are shown in Figure 2(a). Each buoy is offset  
 143 10 cm vertically from each other. VMT arrivals are based on a theoretical travel time of 1115  
 144  $\text{km/hr}^{-1}$  as indicated by grey, dotted vertical lines, and oceanic tsunami arrivals are based on an  
 145 average travel time of 700  $\text{km/hr}^{-1}$  as indicated by orange, dotted vertical lines.

146

147

148

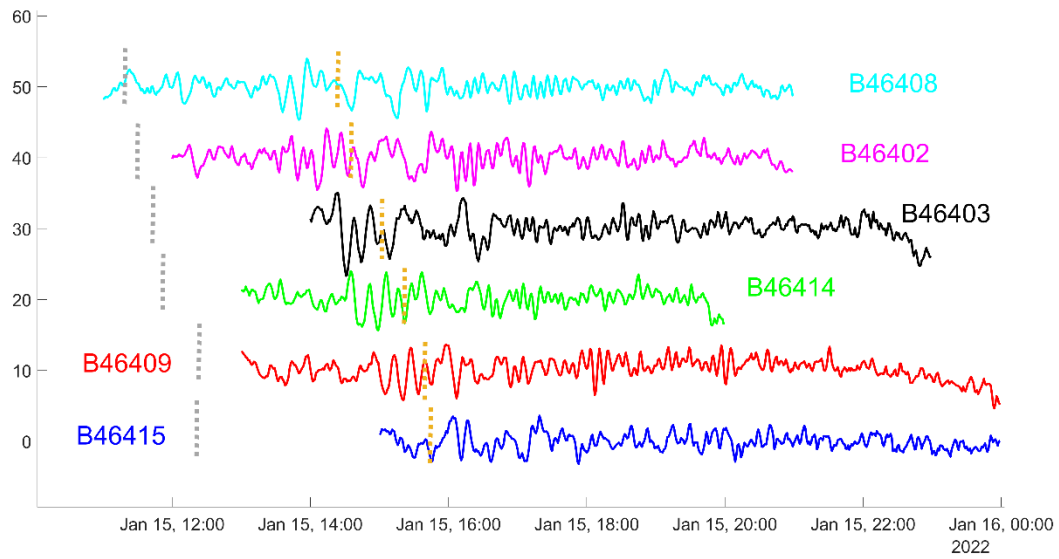

149

150 **Figure S16** WL response to the volcanic meteotsunami and oceanic tsunami at NDBC deep-  
 151 water buoys in the North Pacific. Buoys numbers are official NDBC designations; details of each  
 152 buoy can be found in Table S1, and locations are shown in Figure 2(a). Each buoy is offset 10  
 153 cm vertically from each other. VMT arrivals are based on a theoretical travel time of  $1115 \text{ km/hr}^{-1}$   
 154 <sup>1</sup> as indicated by grey, dotted vertical lines, and oceanic tsunami arrivals are based on an average  
 155 travel time of  $700 \text{ km/hr}^{-1}$  as indicated by orange, dotted vertical lines.

156

157

158

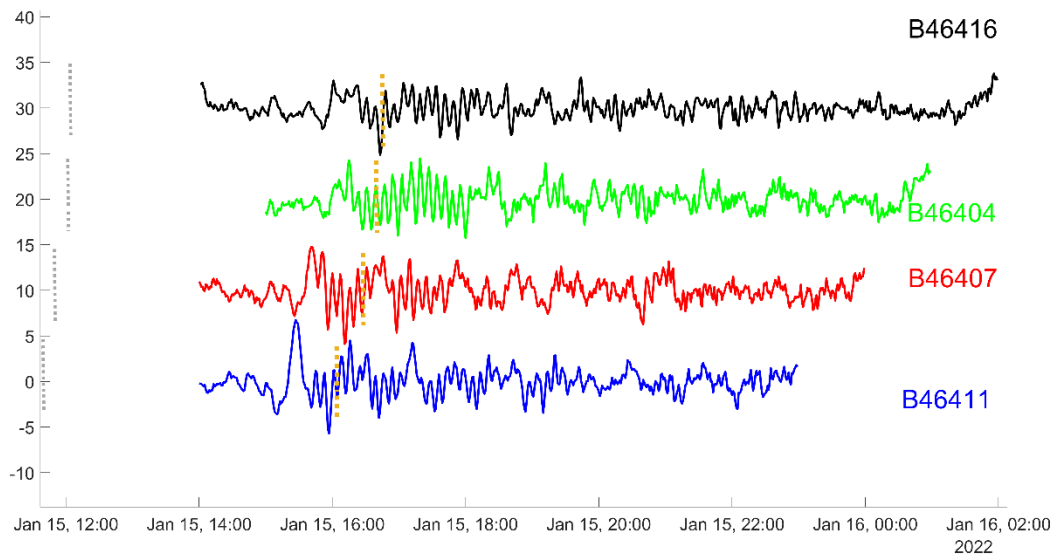

159

160 **Figure S17** WL response to the volcanic meteotsunami and oceanic tsunami at NDBC deep-  
 161 water buoys in the Northeast Pacific. Buoys numbers are official NDBC designations; details of  
 162 each buoy can be found in Table S1, and locations are shown in Figure 2(a). Each buoy is offset  
 163 10 cm vertically from each other. VMT arrivals are based on a theoretical travel time of 1115  
 164  $\text{km/hr}^{-1}$  as indicated by grey, dotted vertical lines, and oceanic tsunami arrivals are based on an  
 165 average travel time of 700  $\text{km/hr}^{-1}$  as indicated by orange, dotted vertical lines.

166

167

168

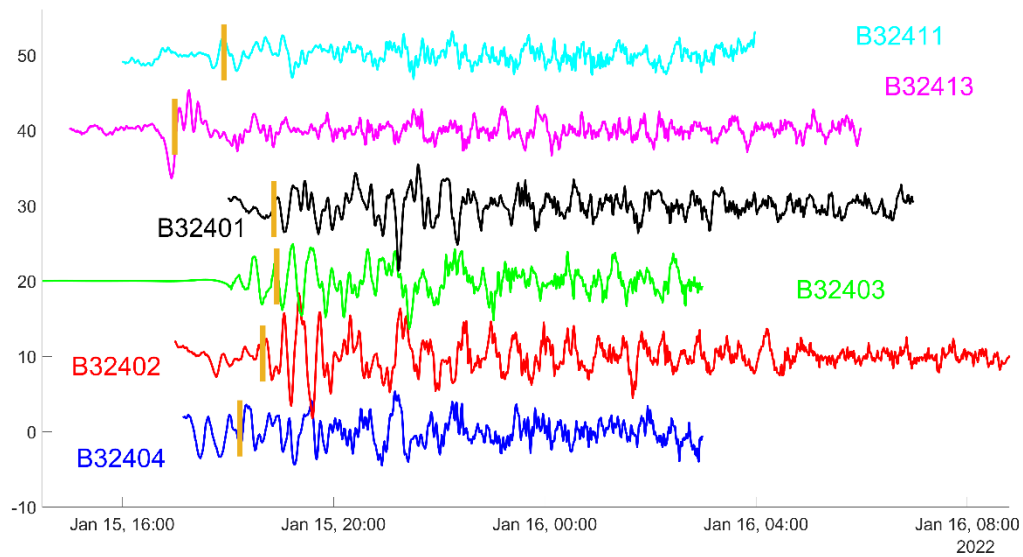

169

170 **Figure S18** WL response to the volcanic meteotsunami and oceanic tsunami at NDBC deep-  
 171 water buoys in the Southeast Pacific. Buoys numbers are official NDBC designations; details of  
 172 each buoy can be found in Table S1, and locations are shown in Figure 2(a). Each buoy is offset  
 173 10 cm vertically from each other. Oceanic tsunami arrivals are based on an average travel time of  
 174  $700 \text{ km/hr}^{-1}$  as indicated by orange vertical lines. None of these stations recorded the VMT,  
 175 which arrived a few hours before the starting time axis of this plot.

176

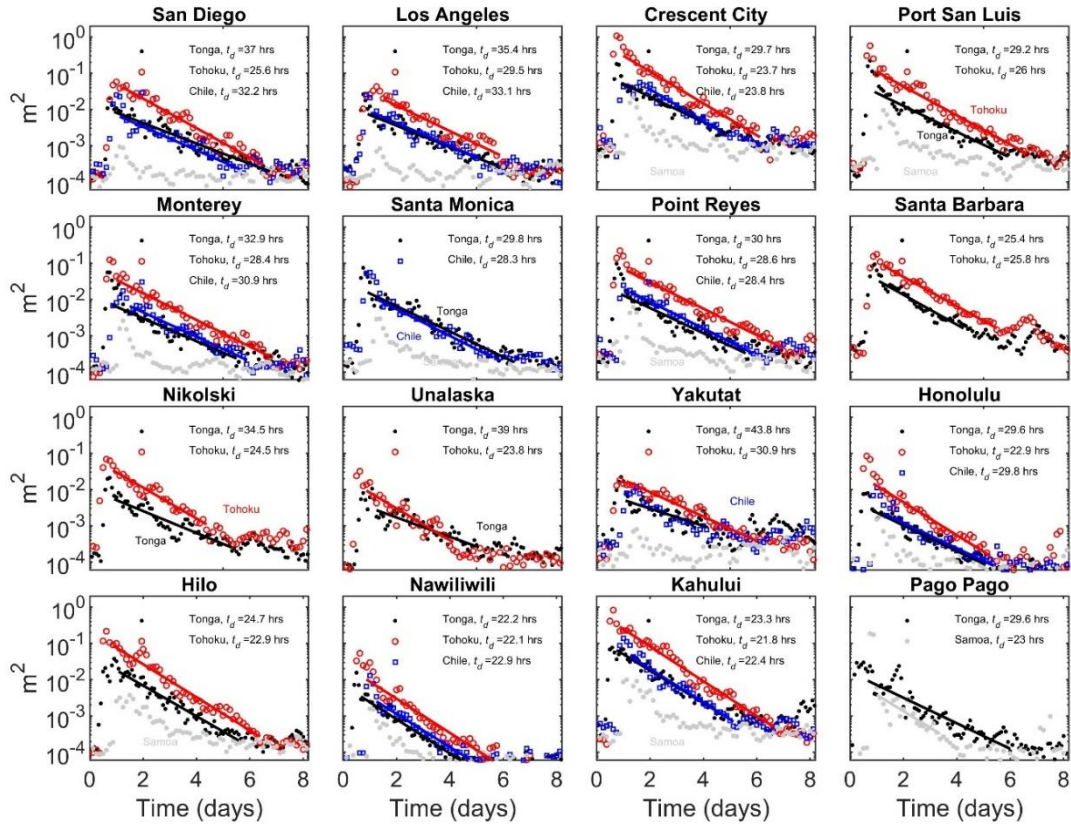

177

178 **Figure S19** Individual comparisons of energy decay time scales at Northern Pacific locations for  
 179 the Tonga (2022), Chile (2010), Samoa (2009), and Tohoku (2011) tsunami events. Sixteen  
 180 locations are shown in California, Alaska, Hawaii, and Pago Pago. In all plots, the Tonga Event  
 181 is indicated by black markers, Tohoku by red, and Chile by blue. A line is fit to each spectral  
 182 energy decay curve and an e-folding time-decay estimated (see main text). Some locations did  
 183 not have data for one or two events. The Pago Pago plot at the bottom right only compares  
 184 Tonga to the 2009 Samoa Event (grey).

185 **Table S1** Stations used for analysis in this study (including tide gauges and deep-water buoys).  
 186 Given are station names/countries, latitude and longitude, distance from the Tonga volcano, data  
 187 source, and filename of each station used in the online repository. EC: European Commission;  
 188 IOC: Intergovernmental Oceanographic Commission; NOAA: National Oceanic and  
 189 Atmospheric Administration; LINZ: Land Information New Zealand; NIWA: National Institute  
 190 of Water and Atmospheric Research (NZ).

191

| <u>Station</u>                           | <u>Lat</u> | <u>Lon</u>  | <u>Distance<br/>(km)</u> | <u>Data Source</u> | <u>Filename</u> |
|------------------------------------------|------------|-------------|--------------------------|--------------------|-----------------|
| <i>Suva, Fiji</i>                        | -18.134199 | 178.423599  | 702.58                   | EC                 | Suva            |
| <i>Lautoka, Fiji</i>                     | -17.6049   | 177.438293  | 821.76                   | EC                 | Lautoka         |
| <i>Ouinne, New Caledonia</i>             | -21.982878 | 166.683273  | 1864.41                  | EC                 | Ouinne          |
| <i>Hienghene, New Caledonia</i>          | -20.692833 | 164.942169  | 2046.58                  | EC                 | Hienghene       |
| <i>Noumea, New Caledonia</i>             | -22.247    | 166.412003  | 1893.37                  | EC                 | Noumea          |
| <i>Ouvea, New Caledonia</i>              | -20.549816 | 166.561867  | 1879.11                  | IOC                | Ouvea           |
| <i>Thio, New Caledonia</i>               | -21.613805 | 166.241528  | 1909.35                  | IOC                | Thio            |
| <i>Fongafele, Tuvalu</i>                 | -8.5025    | 179.195206  | 1459.33                  | EC                 | Fongafele       |
| <i>Port Vila, Vanuatu</i>                | -17.755301 | 168.307693  | 1740.14                  | EC                 | PortVila        |
| <i>Luganville, Vanuatu</i>               | -15.5156   | 167.188599  | 1924.23                  | EC                 | Luganville      |
| <i>Litzlitz, Vanuatu</i>                 | -16.11283  | 167.44397   | 1877.13                  | IOC                | Litzlitz        |
| <i>Honiara, Solomon Islands</i>          | -9.4289    | 159.955505  | 2917.02                  | EC                 | Honiara         |
| <i>Tarekukure Wharf, Solomon Islands</i> | -6.6928    | 156.4086    | 3405.77                  | EC                 | Tarekukure      |
| <i>Lombrum/Manus, Papua New Guinea</i>   | -2.0421    | 147.373703  | 4531.82                  | EC                 | Lombrum         |
| <i>Pago Pago, American Samoa</i>         | -14.2766   | -170.690704 | 855.49                   | NOAA               | PagoPago        |
| <i>Apia, American Samoa</i>              | -13.8268   | -171.761307 | 839.22                   | NOAA               | ApiaSamoa       |
| <i>Tarawa, Kiribati</i>                  | 1.363      | 172.929993  | 2747.69                  | EC                 | Tarawa          |
| <i>Christmas, Kiribati</i>               | 1.984      | -157.473007 | 3174.64                  | EC                 | ChristmasKB     |
| <i>Palmyra Island, USA</i>               | 5.89       | -162.089996 | 3277.66                  | EC                 | Palmyra         |
| <i>Penrhyn, Cook Islands</i>             | -9.001     | -158.050995 | 2258.69                  | EC                 | Penrhyn         |
| <i>Hilo, HI, USA</i>                     | 19.733     | -155.057999 | 4994.44                  | NOAA               | Hilo            |
| <i>Kawaihae, HI, USA</i>                 | 20.035999  | -155.832001 | 4987.86                  | NOAA               | Kawaihae        |
| <i>Kahului, HI, USA</i>                  | 20.898001  | -156.472    | 5045.13                  | NOAA               | Kahului         |
| <i>Honolulu, HI, USA</i>                 | 21.306999  | -157.867004 | 5026.97                  | NOAA               | Honolulu        |
| <i>Barbers Point, HI, USA</i>            | 21.3218    | -158.119293 | 5018.17                  | NOAA               | BarbersPoint    |
| <i>Mokuoloe, HI, USA</i>                 | 21.4331    | -157.789993 | 5043.00                  | NOAA               | Mokuoloe        |
| <i>Nawiliwili, HI, USA</i>               | 21.957001  | -159.360001 | 5035.09                  | NOAA               | Nawiliwili      |
| <i>French Frigate Shoals, HI, USA</i>    | 23.867001  | -166.283005 | 5034.75                  | NOAA               | FrenchFrigate   |
| <i>Johnston Island, USA</i>              | 16.739     | -169.5233   | 4193.82                  | NOAA               | Johnston        |
| <i>Midway, Island, USA</i>               | 28.207001  | -177.356003 | 5424.12                  | NOAA               | Midway          |
| <i>Rarotonga, Cook Islands</i>           | -21.200001 | -159.783005 | 1621.78                  | EC                 | Rarotonga       |
| <i>Tubuai, Austral Islands</i>           | -23.341999 | -149.475998 | 2686.56                  | EC                 | Tubuai          |
| <i>Huahine Island, French Polynesia</i>  | -16.722    | -151.031998 | 2597.95                  | EC                 | Huahine         |

|                                          |            |             |         |      |                |
|------------------------------------------|------------|-------------|---------|------|----------------|
| <i>Papeete, Tahiti, French Polynesia</i> | -17.533092 | -149.572678 | 2730.53 | EC   | Papeete        |
| <i>Vairao, Tahiti, French Polynesia</i>  | -17.805923 | -149.295303 | 2753.67 | EC   | Vairao         |
| <i>Makemo, Tuamotu, French Polynesia</i> | -16.6269   | -143.569107 | 3375.76 | EC   | Makemo         |
| <i>Rikitea, French Polynesia</i>         | -23.117774 | -134.968888 | 4168.47 | IOC  | Rikitea        |
| <i>Nuku Hiva, French Polynesia</i>       | -8.9219    | -140.095306 | 3997.18 | EC   | NukuHiva       |
| <i>Hiva Oa, French Polynesia</i>         | -9.8047    | -139.034393 | 4068.08 | EC   | HivaOa         |
| <i>Easter Island, Chile</i>              | -27.15485  | -109.4394   | 6673.38 | EC   | Easter         |
| <i>Juan Fernandez Island, Chile</i>      | -33.617001 | -78.824997  | 9336.31 | EC   | JuanFernandez  |
| <i>San Felix Island, Chile</i>           | -26.257999 | -80.124001  | 9508.60 | EC   | SanFelix       |
| <i>Baltra, Galapagos Islands</i>         | -0.433     | -90.282997  | 9480.35 | EC   | Baltra         |
| <i>Santa Cruz, Galapagos Islands</i>     | -0.752     | -90.306999  | 9465.40 | EC   | SantaCruzGI    |
| <i>Wake Island, USA</i>                  | 19.290001  | 166.617996  | 4842.91 | NOAA | Wake           |
| <i>Kwajalein Island, USA</i>             | 8.7367     | 167.738297  | 3741.86 | NOAA | Kwajalein      |
| <i>Chuuk, Micronesia</i>                 | 7.4536833  | 151.898242  | 4740.68 | IOC  | Chuuk          |
| <i>Nauru</i>                             | -0.5319    | 166.9092    | 2941.50 | IOC  | Nauru          |
| <i>Pohnpei, Micronesia</i>               | 6.9806     | 158.200104  | 4206.74 | EC   | Pohnpei        |
| <i>Saipan Island, USA</i>                | 15.2266    | 145.741592  | 5817.29 | EC   | Saipan         |
| <i>Pago Bay, Guam, USA</i>               | 13.4283    | 144.796997  | 5762.29 | NOAA | GuamPagoBay    |
| <i>Apra Harbor, Guam, USA</i>            | 13.438     | 144.651993  | 5774.96 | NOAA | GuamApra       |
| <i>Chichijima Island, Japan</i>          | 27.09      | 142.190002  | 6993.49 | EC   | Chichijima     |
| <i>Naha, Japan</i>                       | 26.219999  | 127.669998  | 8044.97 | EC   | Naha           |
| <i>Ishigaki, Japan</i>                   | 24.200001  | 124.099998  | 8222.22 | EC   | Ishigaki       |
| <i>Nikol'skoe, Russia</i>                | 55.2       | 166.02      | 8604.28 | EC   | Nikolskoe      |
| <i>Vodopadnaya, Russia</i>               | 51.726762  | 157.988892  | 8442.92 | EC   | Vodopadnaya    |
| <i>Preobrazheniye, Russia</i>            | 42.909229  | 133.922482  | 8753.06 | IOC  | Preobrazheniye |
| <i>Rudnaya Pristan, Russia</i>           | 44.35      | 135.8       | 8752.60 | IOC  | Rudnaya        |
| <i>Abashiri, Japan</i>                   | 44.02      | 144.289993  | 8268.43 | EC   | Abashiri       |
| <i>Hanasaki, Japan</i>                   | 43.279999  | 145.570007  | 8139.91 | EC   | Hanasaki       |
| <i>Kushiro, Japan</i>                    | 42.98      | 144.369995  | 8174.57 | EC   | Kushiro        |
| <i>Hakodate, Japan</i>                   | 41.779999  | 140.720001  | 8269.28 | EC   | Hakodate       |
| <i>Ofunato, Japan</i>                    | 39         | 141.75      | 7981.82 | EC   | Ofunato        |
| <i>Mera, Japan</i>                       | 34.919998  | 139.830002  | 7769.22 | EC   | Mera           |
| <i>Omaezaki, Japan</i>                   | 34.599998  | 138.229996  | 7848.09 | EC   | Omaezaki       |
| <i>Kushimoto, Japan</i>                  | 33.48      | 135.770004  | 7929.11 | EC   | Kushimoto      |
| <i>Tosashimizu, Japan</i>                | 32.779999  | 132.970001  | 8075.67 | EC   | Tosashimizu    |
| <i>Aburatsu, Japan</i>                   | 31.58      | 131.410004  | 8105.79 | EC   | Aburatsu       |
| <i>Nagasaki, Japan</i>                   | 32.740002  | 129.869995  | 8299.42 | EC   | Nagasaki       |
| <i>Shek Pik, Hong Kong SAR, China</i>    | 22.220278  | 113.894444  | 9025.52 | IOC  | ShekPik        |
| <i>Quarry Bay, Hong Kong SAR, China</i>  | 22.2911111 | 114.213333  | 8999.72 | IOC  | QuarryBay      |
| <i>Shenzhen, China</i>                   | 22.47      | 113.88      | 9039.27 | IOC  | Shenzhen       |
| <i>Qinglan, China</i>                    | 19.57      | 110.82      | 9185.33 | IOC  | Qinglan        |

|                                            |            |             |          |      |                   |
|--------------------------------------------|------------|-------------|----------|------|-------------------|
| <i>Davao, Philippines</i>                  | 7.1537     | 125.6629    | 7136.86  | IOC  | Davao             |
| <i>Esperance, Australia</i>                | -33.870899 | 121.895401  | 6283.19  | EC   | Esperance         |
| <i>Portland, Australia</i>                 | -38.343399 | 141.613205  | 4558.73  | EC   | PortlandAU        |
| <i>Burnie, Australia</i>                   | -41.050098 | 145.914993  | 4292.33  | EC   | Burnie            |
| <i>Spring Bay, Australia</i>               | -42.545898 | 147.932693  | 4199.93  | EC   | SpringBay         |
| <i>Port Kembla, Australia</i>              | -34.473801 | 150.911896  | 3644.67  | EC   | PortKembla        |
| <i>Twofold Bay, Australia</i>              | -37.1003   | 149.9266    | 3818.21  | IOC  | TwoFoldBay        |
| <i>Gold Coast, Australia</i>               | -27.9387   | 153.4326    | 3257.40  | IOC  | GoldCoast         |
| <i>Rossllyn Bay, Australia</i>             | -23.161    | 150.7902    | 3495.81  | EC   | RossllynBay       |
| <i>Norfolk Island, Australia</i>           | -29.0591   | 167.9536    | 1927.61  | IOC  | NorfolkIsland     |
| <i>Lihou Reef, Australia</i>               | -17.133    | 152.145     | 3432.82  | IOC  | LihouReef         |
| <i>Torres Strait, Australia</i>            | -10.5865   | 142.2219    | 4659.68  | IOC  | TorresStrait      |
| <i>Cape Ferguson, Australia</i>            | -19.2773   | 147.058395  | 3920.81  | IOC  | CapeFerguson      |
| <i>Chatham Island, New Zealand</i>         | -44.025002 | -176.369003 | 2613.45  | EC   | Chatham           |
| <i>North Cape, New Zealand</i>             | -34.41     | 173.050003  | 1915.70  | EC   | NorthCape         |
| <i>Great Barrier Island, New Zealand</i>   | -36.188999 | 175.488907  | 1953.88  | EC   | GreatBarrier      |
| <i>Auckland, New Zealand</i>               | -36.831402 | 174.786499  | 2047.11  | EC   | Auckland          |
| <i>Manakau, New Zealand</i>                | -37.047001 | 174.511993  | 2080.17  | EC   | Manakau           |
| <i>Tauranga, New Zealand</i>               | -37.64109  | 176.181183  | 2068.75  | EC   | Tauranga          |
| <i>East Cape, New Zealand</i>              | -37.549999 | 178.158997  | 1991.92  | EC   | EastCape          |
| <i>Gisborne, New Zealand</i>               | -38.675411 | 178.022873  | 2113.77  | EC   | Gisborne          |
| <i>Napier, New Zealand</i>                 | -39.475662 | 176.920059  | 2230.33  | EC   | Napier            |
| <i>Castlepoint, New Zealand</i>            | -40.898998 | 176.231995  | 2399.00  | EC   | Castlepoint       |
| <i>Wellington, New Zealand</i>             | -41.284622 | 174.779099  | 2486.62  | EC   | Wellington        |
| <i>Kaikoura, New Zealand</i>               | -42.412998 | 173.703003  | 2638.24  | EC   | Kaikoura          |
| <i>Christchurch, New Zealand</i>           | -43.57     | 172.772995  | 2787.14  | EC   | Christchurch      |
| <i>Puysegur Welcome Bay, New Zealand</i>   | -46.084999 | 166.589005  | 3280.64  | EC   | Puysegur          |
| <i>Jackson Bay, New Zealand</i>            | -43.973301 | 168.616104  | 2996.98  | EC   | JacksonBay        |
| <i>Dog Island, New Zealand</i>             | -46.65     | 168.412222  | 3254.00  | NIWA | DogIsland         |
| <i>Green Island, New Zealand</i>           | -45.952778 | 170.387778  | 3109.59  | NIWA | GreenIsland       |
| <i>Westgate Port Taranaki, New Zealand</i> | -39.055    | 174.035     | 2294.43  | NIWA | Taranaki          |
| <i>Timaru, New Zealand</i>                 | -44.389444 | 171.256389  | 2924.68  | NIWA | Timaru            |
| <i>Moturiki, New Zealand</i>               | -37.633611 | 176.192222  | 2067.58  | NIWA | Moturiki          |
| <i>Little Kaiteriteri, New Zealand</i>     | -41.026667 | 173.018333  | 2528.04  | NIWA | LittleKaiteriteri |
| <i>Scott Base, Antarctica</i>              | -77.841111 | 167.09      | 6441.13  | LINZ | ScottBase         |
| <i>Base Prat, Antarctica</i>               | -62.478802 | -59.664398  | 9219.80  | EC   | BasePrat          |
| <i>Vernadsky-Faraday, Antarctica</i>       | -65.25     | -64.27      | 8871.59  | EC   | Vernadsky         |
| <i>Base O'Higgins, Antarctica</i>          | -63.321    | -57.901     | 9244.86  | IOC  | BaseOHiggins      |
| <i>King Edward Point, Sandwich Islands</i> | -54.28     | -36.5       | 10819.33 | IOC  | KingEdward        |
| <i>Puerto Williams, Chile</i>              | -54.9333   | -67.611198  | 9222.49  | EC   | PuertoWilliams    |
| <i>Ushuaia, Chile</i>                      | -54.817001 | -68.217003  | 9193.22  | EC   | Ushuaia           |



|                                 |            |             |          |     |               |
|---------------------------------|------------|-------------|----------|-----|---------------|
| <i>Puerto Eden, Chile</i>       | -49.132    | -74.421898  | 9056.12  | EC  | PuertoEden    |
| <i>Puerto Melinka, Chile</i>    | -43.898331 | -73.748329  | 9323.49  | EC  | PuertoMelinka |
| <i>Castro, Chile</i>            | -42.480549 | -73.758331  | 9383.75  | EC  | Castro        |
| <i>Ancud, Chile</i>             | -41.866913 | -73.83168   | 9404.66  | EC  | Ancud         |
| <i>Bahia Mansa, Chile</i>       | -40.580799 | -73.737198  | 9467.64  | EC  | BahiaMansa    |
| <i>Corral, Chile</i>            | -39.866699 | -73.433296  | 9522.55  | EC  | Corral        |
| <i>Lebu, Chile</i>              | -37.59     | -73.660004  | 9604.42  | EC  | Lebu          |
| <i>Coronel, Chile</i>           | -37.028957 | -73.151779  | 9670.46  | EC  | Coronel       |
| <i>Talcahuano, Chile</i>        | -36.6833   | -73.099998  | 9690.07  | EC  | Talcahuano    |
| <i>Quiriquina, Chile</i>        | -36.636139 | -73.057259  | 9695.67  | EC  | Quiriquina    |
| <i>Constitucion, Chile</i>      | -35.360001 | -72.459999  | 9802.19  | EC  | Constitucion  |
| <i>San Antonio, Chile</i>       | -33.583302 | -71.633301  | 9952.56  | EC  | SanAntonio    |
| <i>Valparaiso, Chile</i>        | -33.033001 | -71.616997  | 9979.36  | EC  | Valparaiso    |
| <i>Quintero, Chile</i>          | -32.775551 | -71.525284  | 9999.05  | EC  | Quintero      |
| <i>Pichidangui, Chile</i>       | -32.135609 | -71.529297  | 10028.33 | EC  | Pichidangui   |
| <i>Coquimbo, Chile</i>          | -29.93     | -71.349998  | 10146.11 | EC  | Coquimbo      |
| <i>Huasco, Chile</i>            | -28.460819 | -71.223831  | 10225.46 | EC  | Huasco        |
| <i>Caldera, Chile</i>           | -27.058001 | -70.834     | 10325.64 | EC  | Caldera       |
| <i>Chañaral, Chile</i>          | -26.356667 | -70.646111  | 10375.35 | EC  | Chañaral      |
| <i>Taltal, Chile</i>            | -25.40811  | -70.491676  | 10433.76 | EC  | Taltal        |
| <i>Paposo, Chile</i>            | -25.00898  | -70.468727  | 10454.54 | EC  | Paposo        |
| <i>Antofagasta, Chile</i>       | -23.653133 | -70.404442  | 10523.82 | EC  | Antofagasta   |
| <i>Mejillones, Chile</i>        | -23.0975   | -70.450829  | 10545.43 | EC  | Mejillones    |
| <i>Tocopilla, Chile</i>         | -22.09376  | -70.211647  | 10614.49 | EC  | Tocopilla     |
| <i>Patache, Chile</i>           | -20.800278 | -70.194168  | 10676.29 | EC  | Patache       |
| <i>Iquique, Chile</i>           | -20.2167   | -70.169998  | 10705.63 | EC  | Iquique       |
| <i>Pisagua, Chile</i>           | -19.5966   | -70.2136    | 10730.17 | EC  | Pisagua       |
| <i>Arica, Chile</i>             | -18.4758   | -70.323227  | 10771.28 | EC  | Arica         |
| <i>Matarani, Peru</i>           | -17.0009   | -72.108803  | 10665.18 | EC  | Matarani      |
| <i>Callao, Peru</i>             | -12.071    | -77.174004  | 10373.30 | EC  | Callao        |
| <i>La Libertad, Ecuador</i>     | -2.209     | -80.902     | 10387.30 | EC  | LaLibertad    |
| <i>Cocos Island, Costa Rica</i> | 5.556083   | -87.04783   | 10051.31 | IOC | CocosIslandCR |
| <i>Quepos, Costa Rica</i>       | 9.4255     | -84.1702    | 10498.50 | IOC | Quepos        |
| <i>La Libertad, El Salvador</i> | 13.4851    | -89.319     | 10130.38 | IOC | LaLibertadSV  |
| <i>Acajutla, El Salvador</i>    | 13.573792  | -89.838128  | 10081.48 | IOC | Acajutla      |
| <i>Puerto Madero, Mexico</i>    | 14.712     | -92.401001  | 9869.96  | EC  | PuertoMadero  |
| <i>Puerto Angel, Mexico</i>     | 15.66667   | -96.491669  | 9503.65  | EC  | PuertoAngel   |
| <i>Huatulco, Mexico</i>         | 15.75006   | -96.11689   | 9544.23  | EC  | Huatulco      |
| <i>Acapulco, Mexico</i>         | 16.837999  | -99.903     | 9221.15  | EC  | Acapulco      |
| <i>Lazaro Cardenas, Mexico</i>  | 17.940001  | -102.178001 | 9052.19  | EC  | Lazaro        |
| <i>Zihuatanejo, Mexico</i>      | 17.636669  | -101.558296 | 9097.59  | EC  | Zihuatanejo   |

|                                      |            |             |         |      |                |
|--------------------------------------|------------|-------------|---------|------|----------------|
| <i>Puerto Vallarta, Mexico</i>       | 20.6579333 | -105.242867 | 8893.74 | IOC  | PuertoVallarta |
| <i>Mazatlan, Mexico</i>              | 23.181     | -106.424004 | 8912.70 | IOC  | Mazatlan       |
| <i>La Paz, Mexico</i>                | 24.2673167 | -110.332833 | 8620.79 | IOC  | LaPaz          |
| <i>San Diego, CA, USA</i>            | 32.714199  | -117.173599 | 8558.37 | NOAA | SanDiego       |
| <i>La Jolla, CA, USA</i>             | 32.867001  | -117.258003 | 8561.73 | NOAA | LaJolla        |
| <i>Los Angeles, CA, USA</i>          | 33.719898  | -118.272903 | 8540.50 | NOAA | LosAngeles     |
| <i>Santa Monica, CA, USA</i>         | 34.008301  | -118.5      | 8542.55 | NOAA | SantaMonica    |
| <i>Santa Barbara, CA, USA</i>        | 34.403099  | -119.692802 | 8480.98 | NOAA | SantaBarbara   |
| <i>Oil Platform Harvest, CA, USA</i> | 34.4692    | -120.6819   | 8413.57 | NOAA | OilPlatform    |
| <i>Port San Luis, CA, USA</i>        | 35.1688    | -120.754204 | 8456.28 | NOAA | PortSanLuis    |
| <i>Monterey, CA, USA</i>             | 36.605     | -121.8881   | 8476.26 | NOAA | Monterey       |
| <i>San Francisco, CA, USA</i>        | 37.806301  | -122.465897 | 8521.78 | NOAA | SanFrancisco   |
| <i>Alameda, CA, USA</i>              | 37.771999  | -122.297997 | 8530.68 | NOAA | Alameda        |
| <i>Richmond, CA, USA</i>             | 37.923     | -122.409599 | 8533.89 | NOAA | Richmond       |
| <i>Redwood City, CA, USA</i>         | 37.506802  | -122.211502 | 8517.72 | NOAA | RedwoodCity    |
| <i>Point Reyes, CA, USA</i>          | 37.996101  | -122.9767   | 8501.05 | NOAA | PointReyes     |
| <i>Arena Cove, CA, USA</i>           | 38.912998  | -123.705002 | 8519.25 | NOAA | ArenaCove      |
| <i>North Spit, CA, USA</i>           | 40.7663    | -124.217201 | 8622.45 | NOAA | NorthSpit      |
| <i>Crescent City, CA, USA</i>        | 41.744999  | -124.182999 | 8697.03 | NOAA | CrescentCity   |
| <i>Port Orford, OR, USA</i>          | 42.738998  | -124.498299 | 8751.69 | NOAA | PortOrford     |
| <i>Charleston, OR, USA</i>           | 43.345001  | -124.321701 | 8807.56 | NOAA | CharlestonOR   |
| <i>South Beach, OR, USA</i>          | 44.625     | -124.042999 | 8919.55 | NOAA | SouthBeachOR   |
| <i>Garibaldi, OR, USA</i>            | 45.554501  | -123.9189   | 8996.08 | NOAA | Garibaldi      |
| <i>Astoria, OR, USA</i>              | 46.208     | -123.766998 | 9053.52 | NOAA | Astoria        |
| <i>Toke Point, WA, USA</i>           | 46.7075    | -123.966904 | 9079.46 | NOAA | TokePoint      |
| <i>Westport, WA, USA</i>             | 46.908001  | -124.110001 | 9086.43 | NOAA | Westport       |
| <i>La Push, WA USA</i>               | 47.9133    | -124.637001 | 9133.05 | NOAA | LaPush         |
| <i>Neah Bay, WA, USA</i>             | 48.3703    | -124.601898 | 9169.59 | NOAA | NeahBay        |
| <i>Port Angeles, WA, USA</i>         | 48.124699  | -123.441101 | 9214.53 | NOAA | PortAngeles    |
| <i>Port Townsend, WA, USA</i>        | 48.1129    | -122.759499 | 9251.42 | NOAA | PortTownsend   |
| <i>Friday Harbor, WA, USA</i>        | 48.5453    | -123.012901 | 9269.31 | NOAA | FridayHarbor   |
| <i>Bamfield, BC, Canada</i>          | 48.84      | -125.139999 | 9176.50 | EC   | Bamfield       |
| <i>Victoria Harbour, BC, Canada</i>  | 48.42      | -123.37     | 9240.41 | IOC  | Victoria       |
| <i>Tofino, BC, Canada</i>            | 49.15      | -125.91     | 9159.78 | IOC  | Tofino         |
| <i>Port Alberni, BC, Canada</i>      | 49.2256    | -124.8137   | 9223.22 | IOC  | PortAlberni    |
| <i>Port Hardy, BC, Canada</i>        | 50.716667  | -127.483333 | 9202.69 | IOC  | PortHardy      |
| <i>Winter Harbour, BC, Canada</i>    | 50.7       | -128.3      | 9161.33 | IOC  | WinterHarbour  |
| <i>Henslung Cove, BC, Canada</i>     | 54.18333   | -133        | 9239.02 | IOC  | HenslungCove   |
| <i>Port Alexander, AK, USA</i>       | 56.2467    | -134.647003 | 9352.77 | NOAA | PortAlexander  |
| <i>Sitka, AK, USA</i>                | 57.051701  | -135.341705 | 9397.82 | NOAA | Sitka          |
| <i>Elfin Cove, AK, USA</i>           | 58.193298  | -136.343307 | 9463.80 | NOAA | ElfinCove      |

|                                          |            |             |          |      |               |
|------------------------------------------|------------|-------------|----------|------|---------------|
| <i>Juneau, AK, USA</i>                   | 58.298302  | -134.412003 | 9541.36  | NOAA | Juneau        |
| <i>Skagway, AK, USA</i>                  | 59.450001  | -135.326996 | 9610.79  | NOAA | Skagway       |
| <i>Yakutat, AK, USA</i>                  | 59.548     | -139.735001 | 9476.39  | NOAA | Yakutat       |
| <i>Kodiak Island, AK, USA</i>            | 57.73      | -152.513333 | 8957.51  | NOAA | Kodiak        |
| <i>Seward, AK, USA</i>                   | 60.12      | -149.426667 | 9271.29  | NOAA | Seward        |
| <i>Altiak, AK, USA</i>                   | 56.897499  | -154.248093 | 8833.92  | NOAA | Altiak        |
| <i>Sand Point, AK, USA</i>               | 55.3367    | -160.501694 | 8553.74  | NOAA | SandPoint     |
| <i>King Cove, AK, USA</i>                | 55.059898  | -162.326096 | 8496.91  | NOAA | KingCove      |
| <i>Unalaska, AK, USA</i>                 | 53.883331  | -166.533295 | 8318.46  | NOAA | Unalaska      |
| <i>Nikolski, AK, USA</i>                 | 52.9381    | -168.8678   | 8194.15  | NOAA | Nikolski      |
| <i>Atka, AK, USA</i>                     | 52.231998  | -174.173004 | 8092.28  | NOAA | Atka          |
| <i>Adak, AK, USA</i>                     | 51.862999  | -176.632004 | 8051.32  | NOAA | Adak          |
| <i>St. Paul Island, AK, USA</i>          | 55.3367    | -170.285202 | 8450.49  | NOAA | StPaul        |
| <i>Kerguelen Island, France</i>          | -49.352501 | 70.021797   | 9929.42  | EC   | Kerguelen     |
| <i>Rodrigues, Mauritius</i>              | -19.680241 | 63.421188   | 12208.21 | EC   | Rodrigues     |
| <i>Pointe Des Galets, Reunion Island</i> | -20.92     | 55.279999   | 12833.93 | EC   | Reunion       |
| <i>Toamasina, Madagascar</i>             | -18.1536   | 49.4281     | 13506.44 | IOC  | Toamasina     |
| <i>Lamu, Kenya</i>                       | -2.2667    | 40.9        | 15319.04 | IOC  | Lamu          |
| <i>Mombasa, Kenya</i>                    | -4.067     | 39.65       | 15314.90 | IOC  | Mombasa       |
| <i>Dzaoudzi (Mayotte)</i>                | -12.783    | 45.2583     | 14230.54 | IOC  | Dzaoudzi      |
| <i>Cochin, India</i>                     | 9.96       | 76.26       | 12293.57 | IOC  | Cochin        |
| <i>Majis, Oman</i>                       | 24.518     | 56.606      | 14687.46 | IOC  | Majis         |
| <i>Salalah, Oman</i>                     | 16.935     | 54.0067     | 14817.82 | IOC  | Salalah       |
| <i>Colombo, Sri Lanka</i>                | 6.9406     | 79.8503833  | 11811.23 | IOC  | Colombo       |
| <i>Trincomalee, Sri Lanka</i>            | 8.5637     | 81.1996     | 11730.33 | IOC  | Trincomalee   |
| <i>Visakhapatnam, India</i>              | 17.68      | 83.28       | 11828.50 | IOC  | Visakhapatnam |
| <i>Dakar, Senegal</i>                    | 14.676     | -17.42      | 17592.74 | IOC  | Dakar         |
| <i>Tema, Ghana</i>                       | 5.635343   | 0.011775    | 18285.00 | IOC  | Tema          |
| <i>Takoradi, Ghana</i>                   | 4.882123   | -1.744972   | 18143.53 | IOC  | Takoradi      |
| <i>Garachico, Spain</i>                  | 28.373376  | -16.752875  | 17687.55 | IOC  | Garachico     |
| <i>Palmeira, Cabo Verde Islands</i>      | 16.755     | -22.9833    | 17080.42 | IOC  | Palmeira      |
| <i>Ponta Delgada, Azores Islands</i>     | 37.73      | -25.68      | 17688.00 | IOC  | PontaDelgada  |
| <i>Concarneau, France</i>                | 47.8737    | -3.90738    | 16880.35 | IOC  | Concarneau    |
| <i>Cascais, Portugal (IPMA-IGCAS)</i>    | 38.6932    | -9.4154     | 17589.41 | IOC  | Cascais       |
| <i>Cadiz, Spain</i>                      | 36.54214   | -6.280612   | 17944.74 | IOC  | Cadiz         |
| <i>Saidia Marina, Morocco</i>            | 35.1119    | -2.2929     | 18258.94 | IOC  | Saidia        |
| <i>Sete, France</i>                      | 43.397598  | 3.69911     | 17471.56 | EC   | Sete          |
| <i>Fos-Sur-Mer, France</i>               | 43.404999  | 4.893       | 17472.04 | EC   | FosSurMer     |
| <i>Toulon, France</i>                    | 43.122898  | 5.91472     | 17500.64 | EC   | Toulon        |
| <i>La Figueirette, France</i>            | 43.483532  | 6.933767    | 17454.39 | EC   | LaFigueirette |
| <i>Fontvieille Harbour, Monaco</i>       | 43.728668  | 7.42158     | 17423.11 | EC   | Monaco        |

|                                      |            |            |          |     |                 |
|--------------------------------------|------------|------------|----------|-----|-----------------|
| <i>Centuri, Corsica</i>              | 42.966904  | 9.350146   | 17482.17 | EC  | Centuri         |
| <i>Ajaccio, Corsica</i>              | 41.919998  | 8.76       | 17605.69 | EC  | Ajaccio         |
| <i>Solenzara, Corsica</i>            | 41.835999  | 9.374      | 17604.85 | EC  | Solenzara       |
| <i>Ile Rousse, Corsica</i>           | 42.635556  | 8.938056   | 17524.79 | EC  | IleRousse       |
| <i>Carloforte, Sardinia</i>          | 39.147968  | 8.309453   | 17915.66 | EC  | Carloforte      |
| <i>Cagliari, Sardinia</i>            | 39.21019   | 9.114272   | 17894.63 | EC  | Cagliari        |
| <i>La Spezia, Italy</i>              | 44.096611  | 9.857644   | 17350.83 | EC  | LaSpezia        |
| <i>Livorno, Italy</i>                | 43.546291  | 10.29934   | 17402.65 | EC  | Livorno         |
| <i>Gaeta, Italy</i>                  | 41.209991  | 13.58974   | 17565.42 | EC  | Gaeta           |
| <i>Napoli, Italy</i>                 | 40.8414    | 14.26919   | 17579.80 | EC  | Napoli          |
| <i>Salerno, Italy</i>                | 40.67664   | 14.75084   | 17578.83 | EC  | Salerno         |
| <i>Palinuro, Italy</i>               | 40.029911  | 15.27529   | 17622.50 | EC  | Palinuro        |
| <i>Messina, Sicily</i>               | 38.19632   | 15.56351   | 17787.30 | EC  | Messina         |
| <i>Palermo, Sicily</i>               | 38.12141   | 13.37133   | 17886.17 | EC  | Palermo         |
| <i>Sciacca, Sicily</i>               | 37.504539  | 13.07646   | 17959.20 | EC  | Sciacca         |
| <i>Porto Empedocle, Sicily</i>       | 37.285759  | 13.52684   | 17963.22 | EC  | PortoEmpedocle  |
| <i>Catania, Sicily</i>               | 37.498081  | 15.09383   | 17875.07 | EC  | Catania         |
| <i>Lampedusa, Italy</i>              | 35.499828  | 12.60444   | 18177.57 | EC  | Lampedusa       |
| <i>Crotone, Italy</i>                | 39.08358   | 17.13706   | 17630.65 | EC  | Crotone         |
| <i>Taranto, Italy</i>                | 40.475601  | 17.223761  | 17496.64 | EC  | Taranto         |
| <i>Otranto, Italy</i>                | 40.147148  | 18.497089  | 17467.22 | EC  | Otranto         |
| <i>Vieste, Italy</i>                 | 41.888081  | 16.17701   | 17404.59 | IOC | Vieste          |
| <i>Ortona, Italy</i>                 | 42.3559    | 14.41486   | 17421.33 | IOC | Ortona          |
| <i>S.Benedetto Del Tronto, Italy</i> | 42.9551222 | 13.8897583 | 17376.63 | IOC | Benedetto       |
| <i>Stari Grad, Croatia</i>           | 43.181     | 16.576     | 17262.20 | IOC | StariGrad       |
| <i>Peiraias, Greece</i>              | 37.935001  | 23.621     | 17353.44 | EC  | Peiraias        |
| <i>Syros, Greece</i>                 | 37.438     | 24.941     | 17299.36 | EC  | Syros           |
| <i>Plimiri, Greece (NOA-02)</i>      | 35.9273    | 27.8575    | 17179.98 | EC  | Plimiri         |
| <i>Ierapetra, Crete (NOA-04)</i>     | 35.0037499 | 25.7385292 | 17397.23 | EC  | Ierapetra       |
| <i>Itea, Greece (NOA-05)</i>         | 38.4303513 | 22.4227791 | 17392.90 | EC  | Itea            |
| <i>Aigio, Greece (NOA-06)</i>        | 38.2571411 | 22.0768509 | 17427.92 | EC  | Aigio           |
| <i>Zakynthos, Greece (NOA-07)</i>    | 37.78142   | 20.9052    | 17537.64 | EC  | Zakynthos       |
| <i>Kerykya, Greece (NOA-11)</i>      | 39.79      | 19.91      | 17426.55 | EC  | Kerykya         |
| <i>Bodrum, Turkey</i>                | 37.028999  | 27.42      | 17147.88 | EC  | Bodrum          |
| <i>Marmaris, Turkey</i>              | 36.8379898 | 28.3848457 | 17087.05 | IOC | Marmaris        |
| <i>Antalya, Turkey</i>               | 36.835537  | 30.6126099 | 16915.73 | IOC | Antalya         |
| <i>Tasucu, Turkey</i>                | 36.2814636 | 33.8362274 | 16684.39 | IOC | Tasucu          |
| <i>Marmara Ereğlisi, Turkey</i>      | 40.9689667 | 27.9621524 | 16851.15 | IOC | MarmaraEreglisi |
| <i>Istanbul, Turkey</i>              | 41.1598396 | 29.074131  | 16764.73 | IOC | Istanbul        |
| <i>İgneada, Turkey</i>               | 41.8887634 | 28.0237198 | 16782.20 | IOC | İgneada         |
| <i>Imbituba, Brazil</i>              | -28.2314   | -48.6505   | 12133.26 | IOC | Imbituba        |

|                                             |            |             |          |      |                    |
|---------------------------------------------|------------|-------------|----------|------|--------------------|
| <i>Vieux Fort, St Lucia</i>                 | 13.7209    | -60.9528    | 13048.84 | IOC  | VieuxFort          |
| <i>Dennery, St Lucia</i>                    | 13.9114    | -60.8865    | 13061.63 | IOC  | Dennery            |
| <i>Calliaqua, St Vincent and Grenadines</i> | 13.129912  | -61.1955    | 13005.07 | IOC  | Calliaqua          |
| <i>Fort-de-France, Martinique</i>           | 14.601667  | -61.063333  | 13064.49 | IOC  | Martinique         |
| <i>Deshaies, Guadeloupe</i>                 | 16.30529   | -61.79591   | 13039.34 | IOC  | Guadeloupe         |
| <i>Portsmouth, Dominica</i>                 | 15.5768    | -61.4582    | 13052.87 | IOC  | PortsmouthDominica |
| <i>Blowing Point, Anguilla</i>              | 18.1710861 | -63.0926167 | 12958.97 | IOC  | BlowingPoint       |
| <i>Baharona, Dominican Republic</i>         | 18.208137  | -71.092154  | 12144.61 | IOC  | Baharona           |
| <i>Puerto Plata, Dominican Republic</i>     | 19.798794  | -70.702011  | 12232.04 | IOC  | PuertoPlata        |
| <i>Punta Cana, Dominican Republic</i>       | 18.504603  | -68.375519  | 12429.54 | IOC  | PuntaCana          |
| <i>Charlotte Amelie, US Virgin Islands</i>  | 18.335     | -64.92      | 12776.76 | NOAA | CharlotteAmalie    |
| <i>Lime Tree Bay, US Virgin Islands</i>     | 17.6947    | -64.7538    | 12775.54 | NOAA | LimeTreeBay        |
| <i>Mayaguez, Puerto Rico</i>                | 18.2176    | -67.1588    | 12545.00 | NOAA | Mayaguez           |
| <i>Vieques, Puerto Rico</i>                 | 18.0939    | -65.4714    | 12713.60 | NOAA | Vieques            |
| <i>Salinas, Puerto Rico</i>                 | 17.949063  | -66.225967  | 12632.37 | NOAA | Salinas            |
| <i>Mona Island, Puerto Rico</i>             | 18.09      | -67.9383    | 12461.82 | NOAA | MonaIsland         |
| <i>Tuxpan, Mexico</i>                       | 20.96355   | -97.3286    | 9653.71  | IOC  | Tuxpan             |
| <i>Bermuda Biological Station</i>           | 32.369999  | -64.695     | 13104.76 | NOAA | BermudaBio         |
| <i>St Johns, Canada</i>                     | 47.57      | -52.72      | 14106.51 | IOC  | StJohns            |
| <i>Port Fourchon, LA, USA</i>               | 29.114201  | -90.199203  | 10658.36 | NOAA | PortFourchon       |
| <i>Grand Isle, LA, USA</i>                  | 29.2633    | -89.9567    | 10686.18 | NOAA | GrandIsle          |
| <i>Wrightsville Beach, NC, USA</i>          | 34.213333  | -77.786667  | 11946.07 | NOAA | WrightsvilleBeach  |
| <i>Beaufort, NC, USA</i>                    | 34.72      | -76.67      | 12058.49 | NOAA | Beaufort           |
| <i>Ocean City Inlet, MD, USA</i>            | 38.328333  | -75.091667  | 12277.34 | NOAA | OceanCityInlet     |
| <i>Lewes, DE, USA</i>                       | 38.781667  | -75.12      | 12284.08 | NOAA | Lewes              |
| <i>Cape May, NJ, USA</i>                    | 38.9683    | -74.96      | 12301.42 | NOAA | CapeMay            |
| <i>Atlantic City, NJ, USA</i>               | 39.355     | -74.4183    | 12354.88 | NOAA | AtlanticCity       |
| <i>Woods Hole, MA, USA</i>                  | 41.5233    | -70.6717    | 12703.08 | NOAA | WoodsHole          |
| <i>Nantucket, MA, USA</i>                   | 41.285     | -70.096667  | 12747.74 | NOAA | Nantucket          |
| <i>Buoy #55015</i>                          | -46.956    | 160.343     | 3646     | NDBC | B55015             |
| <i>Buoy #55023</i>                          | -14.715    | 153.537     | 3377     | NDBC | B55023             |
| <i>Buoy #51425</i>                          | -9.505     | -176.26     | 1261     | NDBC | B51425             |
| <i>Buoy #52406</i>                          | -5.373     | 164.99      | 2741     | NDBC | B52406             |
| <i>Buoy #51407</i>                          | 19.556     | -156.538    | 4915     | NDBC | B51407             |
| <i>Buoy #52403</i>                          | 4.026      | 145.616     | 5082     | NDBC | B52403             |
| <i>Buoy #52402</i>                          | 11.93      | 153.895     | 4951     | NDBC | B52402             |
| <i>Buoy #52401</i>                          | 19.283     | 155.729     | 5456     | NDBC | B52401             |
| <i>Buoy #52404</i>                          | 20.629     | 132.139     | 7338     | NDBC | B52404             |
| <i>Buoy #21420</i>                          | 28.891     | 135.022     | 7648     | NDBC | B21420             |
| <i>Buoy #21418</i>                          | 38.76      | 148.65      | 7598     | NDBC | B21418             |
| <i>Buoy #21419</i>                          | 44.401     | 155.653     | 7811     | NDBC | B21419             |

|                    |         |          |         |      |        |
|--------------------|---------|----------|---------|------|--------|
| <i>Buoy #21416</i> | 48.11   | 163.435  | 7926    | NDBC | B21416 |
| <i>Buoy #21415</i> | 50.153  | 171.897  | 7953    | NDBC | B21415 |
| <i>Buoy #46408</i> | 49.666  | -169.88  | 7815    | NDBC | B46408 |
| <i>Buoy #46402</i> | 50.978  | -163.95  | 8003    | NDBC | B46402 |
| <i>Buoy #46403</i> | 52.663  | -156.78  | 8337    | NDBC | B46403 |
| <i>Buoy #46414</i> | 53.726  | -152.48  | 8542    | NDBC | B46414 |
| <i>Buoy #46409</i> | 55.318  | -148.55  | 8815    | NDBC | B46409 |
| <i>Buoy #46415</i> | 52.98   | -139.95  | 8862    | NDBC | B46415 |
| <i>Buoy #46416</i> | 49.901  | -134.4   | 8797    | NDBC | B46416 |
| <i>Buoy #46404</i> | 45.848  | -128.78  | 8740    | NDBC | B46404 |
| <i>Buoy #46407</i> | 42.705  | -128.84  | 8495    | NDBC | B46407 |
| <i>Buoy #46411</i> | 39.335  | -127.07  | 8329    | NDBC | B46411 |
| <i>Buoy #43412</i> | 4.958   | -90.868  | 8493    | NDBC | B43412 |
| <i>Buoy #32411</i> | -7.428  | -93.48   | 9621    | NDBC | B32411 |
| <i>Buoy #32413</i> | -20.474 | -73.421  | 8870    | NDBC | B32413 |
| <i>Buoy #32401</i> | -23.163 | -72.037  | 10336   | NDBC | B32401 |
| <i>Buoy #32403</i> | -26.743 | -73.983  | 10376   | NDBC | B32403 |
| <i>Buoy #32402</i> | -32.123 | -73.799  | 10037   | NDBC | B32402 |
| <i>Buoy #21420</i> | 28.891  | 135.022  | 7647.97 | NDBC | B21420 |
| <i>Buoy #51407</i> | 19.556  | -156.538 | 4907.47 | NDBC | B51407 |

192  
193

194 **Table S2** Air pressure ( $P_A$ ) stations employed. Location names, latitude/longitude, data source,  
 195 source ID number (where available), and filename used in online repository are given. NOAA:  
 196 National Oceanic and Atmospheric Administration (US); NDBC: National Data Buoy Center;  
 197 NIWA/NCD: National Institute of Water and Atmospheric Research National Climate Database  
 198 (NZ); CMD: Chilean Meteorological Directorate; JMA: Japanese Meteorological Agency;  
 199 ISPRA: Istituto Superiore per la Protezione e la Ricerca Ambientale (Italy/EU); BOM: Bureau  
 200 of Meteorology (Australia).

201

| <u>Station name</u>            | <u>Latitude</u> | <u>Longitude</u> | <u>Source</u> | <u>ID</u> | <u>Filename</u>   |
|--------------------------------|-----------------|------------------|---------------|-----------|-------------------|
| <i>Hilo, HI, USA</i>           | 19.733          | -155.058         | NOAA          | 1617760   | Hilo_atm          |
| <i>Kawaihae, HI, USA</i>       | 20.036          | -155.832         | NOAA          | 1617433   | Kawaihae_atm      |
| <i>Kahului, HI, USA</i>        | 20.898          | -156.472         | NOAA          | 1615680   | Kahului_atm       |
| <i>Honolulu, HI, USA</i>       | 21.307          | -157.867         | NOAA          | 1612340   | Honolulu_atm      |
| <i>Nawiliwili, HI, USA</i>     | 21.957          | -159.36          | NOAA          | 1611400   | Nawiliwili_atm    |
| <i>Midway, Island, USA</i>     | 28.207          | -177.356         | NOAA          | 1619910   | Midway_atm        |
| <i>Wake Island, USA</i>        | 19.29           | 166.618          | NOAA          | 1890000   | Wake_atm          |
| <i>Kwajalein Island, USA</i>   | 8.7367          | 167.7383         | NOAA          | 1820000   | Kwajalein_atm     |
| <i>San Diego, CA, USA</i>      | 32.7142         | -117.174         | NOAA          | 9410170   | SanDiego_atm      |
| <i>La Jolla, CA, USA</i>       | 32.867          | -117.258         | NOAA          | 9410230   | LaJolla_atm       |
| <i>Los Angeles, CA, USA</i>    | 33.7199         | -118.273         | NOAA          | 9410230   | LosAngeles_atm    |
| <i>Santa Monica, CA, USA</i>   | 34.0083         | -118.5           | NOAA          | 9410840   | SantaMonica_atm   |
| <i>Santa Barbara, CA, USA</i>  | 34.4031         | -119.693         | NOAA          | 9411340   | SantaBarbara_atm  |
| <i>Port San Luis, CA, USA</i>  | 35.1688         | -120.754         | NOAA          | 9412110   | PortSanLuis_atm   |
| <i>Monterey, CA, USA</i>       | 36.605          | -121.888         | NOAA          | 9413450   | Monterey_atm      |
| <i>San Francisco, CA, USA</i>  | 37.8063         | -122.466         | NOAA          | 9414290   | SanFrancisco_atm  |
| <i>Point Reyes, CA, USA</i>    | 37.9961         | -122.977         | NOAA          | 9415020   | PointReyes_atm    |
| <i>Arena Cove, CA, USA</i>     | 38.913          | -123.705         | NOAA          | 9416841   | ArenaCove_atm     |
| <i>North Spit, CA, USA</i>     | 40.7663         | -124.217         | NOAA          | 9418767   | NorthSpit_atm     |
| <i>Crescent City, CA, USA</i>  | 41.745          | -124.183         | NOAA          | 9419750   | CrescentCity_atm  |
| <i>Port Orford, OR, USA</i>    | 42.739          | -124.498         | NOAA          | 9431647   | PortOrford_atm    |
| <i>Charleston, OR, USA</i>     | 43.345          | -124.322         | NOAA          | 9432780   | CharlestonOR_atm  |
| <i>South Beach, OR, USA</i>    | 44.625          | -124.043         | NOAA          | 9435380   | SouthBeachOR_atm  |
| <i>Garibaldi, OR, USA</i>      | 45.5545         | -123.919         | NOAA          | 9437540   | Garibaldi_atm     |
| <i>Toke Point, WA, USA</i>     | 46.7075         | -123.967         | NOAA          | 9437540   | TokePoint_atm     |
| <i>Westport, WA, USA</i>       | 46.908          | -124.11          | NOAA          | 9441102   | Westport_atm      |
| <i>La Push, WA USA</i>         | 47.9133         | -124.637         | NOAA          | 9442396   | LaPush_atm        |
| <i>Neah Bay, WA, USA</i>       | 48.3703         | -124.602         | NOAA          | 9443090   | NeahBay_atm       |
| <i>Port Angeles, WA, USA</i>   | 48.1247         | -123.441         | NOAA          | 9444090   | PortAngeles_atm   |
| <i>Port Alexander, AK, USA</i> | 56.2467         | -134.647         | NOAA          | 9451054   | PortAlexander_atm |
| <i>Sitka, AK, USA</i>          | 57.0517         | -135.342         | NOAA          | 9451600   | Sitka_atm         |
| <i>Elfin Cove, AK, USA</i>     | 58.1933         | -136.343         | NOAA          | 9452634   | ElfinCove_atm     |
| <i>Juneau, AK, USA</i>         | 58.2983         | -134.412         | NOAA          | 9452210   | Juneau_atm        |

|                                                   |          |          |          |         |                    |
|---------------------------------------------------|----------|----------|----------|---------|--------------------|
| <i>Skagway, AK, USA</i>                           | 59.45    | -135.327 | NOAA     | 9452400 | Skagway_atm        |
| <i>Yakutat, AK, USA</i>                           | 59.548   | -139.735 | NOAA     | 9453220 | Yakutat_atm        |
| <i>Seward, AK, USA</i>                            | 60.12    | -149.427 | NOAA     | 9455090 | Seward_atm         |
| <i>Altiak, AK, USA</i>                            | 56.8975  | -154.248 | NOAA     | 9457804 | Altiak_atm         |
| <i>Sand Point, AK, USA</i>                        | 55.3367  | -160.502 | NOAA     | 9459450 | SandPoint_atm      |
| <i>King Cove, AK, USA</i>                         | 55.0599  | -162.326 | NOAA     | 9459881 | KingCove_atm       |
| <i>Unalaska, AK, USA</i>                          | 53.88333 | -166.533 | NOAA     | 9462620 | Unalaska_atm       |
| <i>Nikolski, AK, USA</i>                          | 52.9381  | -168.868 | NOAA     | 9462450 | Nikolski_atm       |
| <i>Atka, AK, USA</i>                              | 52.232   | -174.173 | NOAA     | 9461710 | Atka_atm           |
| <i>Adak, AK, USA</i>                              | 51.863   | -176.632 | NOAA     | 9461380 | Adak_atm           |
| <i>St. Paul Island, AK, USA</i>                   | 55.3367  | -170.285 | NOAA     | 9464212 | StPaul_atm         |
| <i>Mataveri Easter Island, Chile</i>              | -27.1589 | -109.433 | CMD      | 270001  | Easter_atm         |
| <i>Chacalluta (Arica), Chile</i>                  | -18.3556 | -70.3403 | CMD      | 180005  | Arica_atm          |
| <i>Diego Aracena (Iquique), Chile</i>             | -20.5492 | -70.1811 | CMD      | 200006  | Iquique_atm        |
| <i>Rodelillo (Valparaiso), Chile</i>              | -33.0653 | -71.5564 | CMD      | 330007  | Valparaiso_atm     |
| <i>Florida, La Serena (Coquimbo), Chile</i>       | -29.9144 | -71.2067 | CMD      | 290004  | Coquimbo_atm       |
| <i>Santo Domingo (San Antonio), Chile</i>         | -33.6561 | -71.6133 | CMD      | 330030  | SanAntonio_atm     |
| <i>Carriel Sur, Concepción, Chile</i>             | -36.7806 | -73.0664 | CMD      | 360019  | Concepcion_atm     |
| <i>Pichoy, Valdivia (Corral), Chile</i>           | -39.6567 | -73.0872 | CMD      | 390006  | Corral_atm         |
| <i>Melinka, Chile</i>                             | -43.8978 | -73.7394 | CMD      | 430009  | PuertoMelinka_atm  |
| <i>Midshipman Zañartu, Puerto Williams, Chile</i> | -54.9317 | -67.6156 | CMD      | 550001  | PuertoWilliams_atm |
| <i>Nadi, Fiji</i>                                 | -17.7599 | 177.4448 | NIWA/NCD | 25450   | Fiji_atm           |
| <i>Kerikeri, New Zealand</i>                      | -35.183  | 173.926  | NIWA/NCD | 1056    | Kerikeri_atm       |
| <i>Auckland, New Zealand</i>                      | -36.863  | 174.7119 | NIWA/NCD | 41351   | Auckland_atm       |
| <i>Whakatane, New Zealand</i>                     | -37.9482 | 176.9677 | NIWA/NCD | 40982   | Whakatane_atm      |
| <i>Gisborne, New Zealand</i>                      | -38.6275 | 177.9218 | NIWA/NCD | 24976   | Gisborne_atm       |
| <i>Napier, New Zealand</i>                        | -39.4985 | 176.9119 | NIWA/NCD | 41330   | Napier_atm         |
| <i>Wellington, Greta Point, New Zealand</i>       | -41.3024 | 174.8057 | NIWA/NCD | 41212   | Wellington_atm     |
| <i>Christchurch, Kyle St, New Zealand</i>         | -43.5307 | 172.6077 | NIWA/NCD | 24120   | Christchurch_atm   |
| <i>Milford Sound, New Zealand</i>                 | -44.674  | 167.923  | NIWA/NCD | 40987   | MilfordSound_atm   |
| <i>Dunedin, New Zealand</i>                       | -45.9013 | 170.5147 | NIWA/NCD | 15752   | Dunedin_atm        |
| <i>Wanganui, New Zealand</i>                      | -39.937  | 175.0451 | NIWA/NCD | 3715    | Whanganui_atm      |
| <i>Richmond, New Zealand</i>                      | -41.3277 | 173.1862 | NIWA/NCD | 40751   | Richmond_atm       |
| <i>Norfolk Island, Australia</i>                  | -29.0389 | 167.9408 | BOM      | 200288  | NorfolkIsland_atm  |
| <i>Horn Island, Australia</i>                     | -10.5844 | 142.29   | BOM      | 027058  | HornIsland_atm     |
| <i>Gold Coast Seaway, Australia</i>               | -27.939  | 153.4283 | BOM      | 040764  | GoldCoast_atm      |
| <i>Green Cape, Australia</i>                      | -37.2622 | 150.0504 | BOM      | 069137  | GreenCape_atm      |
| <i>Spring Bay, Australia</i>                      | -42.5464 | 147.9308 | BOM      | 092133  | SpringBay_atm      |
| <i>Portland, Australia</i>                        | -38.3439 | 141.6136 | BOM      | 090192  | PortlandAU_atm     |
| <i>Esperance, Australia</i>                       | -33.8707 | 121.8971 | BOM      | 109504  | Esperance_atm      |
| <i>Chichijima Island, Japan</i>                   | 27.09    | 142.19   | JMA      |         | Chichijima_atm     |



|                                            |          |          |      |         |                       |
|--------------------------------------------|----------|----------|------|---------|-----------------------|
| <i>Naha, Japan</i>                         | 26.22    | 127.67   | JMA  |         | Naha_atm              |
| <i>Ishigaki, Japan</i>                     | 24.2     | 124.1    | JMA  |         | Ishigaki_atm          |
| <i>Abashiri, Japan</i>                     | 44.02    | 144.29   | JMA  |         | Abashiri_atm          |
| <i>Hanasaki, Japan</i>                     | 43.28    | 145.57   | JMA  |         | Hanasaki_atm          |
| <i>Kushiro, Japan</i>                      | 42.98    | 144.37   | JMA  |         | Kushiro_atm           |
| <i>Hakodate, Japan</i>                     | 41.78    | 140.72   | JMA  |         | Hakodate_atm          |
| <i>Ofunato, Japan</i>                      | 39       | 141.75   | JMA  |         | Ofunato_atm           |
| <i>Mera, Japan</i>                         | 34.92    | 139.83   | JMA  |         | Mera_atm              |
| <i>Omaezaki, Japan</i>                     | 34.6     | 138.23   | JMA  |         | Omaezaki_atm          |
| <i>Kushimoto, Japan</i>                    | 33.48    | 135.77   | JMA  |         | Kushimoto_atm         |
| <i>Tosashimizu, Japan</i>                  | 32.78    | 132.97   | JMA  |         | Tosashimizu_atm       |
| <i>Aburatsu, Japan</i>                     | 31.58    | 131.41   | JMA  |         | Aburatsu_atm          |
| <i>Nagasaki, Japan</i>                     | 32.74    | 129.87   | JMA  |         | Nagasaki_atm          |
| <i>Mona Island</i>                         | 18.09    | -67.9383 | NOAA | 9759938 | MonaIsland_atm        |
| <i>Mayaguez, Puerto Rico</i>               | 18.21833 | -67.1617 | NOAA | 9759394 | Mayaguez_atm          |
| <i>Arecibo, Puerto Rico</i>                | 18.48    | -66.7017 | NOAA | 9757809 | Arecibo_atm           |
| <i>San Juan, Puerto Rico</i>               | 18.46    | -66.1167 | NOAA | 9755371 | SanJuan_atm           |
| <i>Esperanza, Puerto Rico</i>              | 18.09333 | -65.4717 | NOAA | 9752695 | Esperanza_atm         |
| <i>Culebra, Puerto Rico</i>                | 18.30167 | -65.3017 | NOAA | 9752235 | Culebra_atm           |
| <i>Charlotte Amalie, US Virgin Islands</i> | 18.335   | -64.92   | NOAA | 9751639 | CharlotteAmalie_atm   |
| <i>Lameshur Bay, US Virgin Islands</i>     | 18.31833 | -64.725  | NOAA | 9751381 | LameshurBay_atm       |
| <i>Lime Tree Bay, US Virgin Islands</i>    | 17.695   | -64.7533 | NOAA | 9751401 | LimeTreeBay_atm       |
| <i>St Croix, US Virgin Islands</i>         | 17.74833 | -64.6983 | NOAA | 9751364 | StCroix_atm           |
| <i>Barbuda</i>                             | 17.59167 | -61.82   | NOAA | 9761115 | Barbuda_atm           |
| <i>Buoy #41046</i>                         | 23.822   | -68.384  | NDBC | 41046   | B41046_atm            |
| <i>Buoy #41043</i>                         | 21.03    | -64.79   | NDBC | 41043   | B41043_atm            |
| <i>Buoy #41049</i>                         | 27.49    | -62.938  | NDBC | 41049   | B41049_atm            |
| <i>Buoy #41047</i>                         | 27.463   | -71.466  | NDBC | 41047   | B41047_atm            |
| <i>Buoy #41044</i>                         | 21.582   | -58.63   | NDBC | 41044   | B41044_atm            |
| <i>Buoy #42059</i>                         | 15.287   | -67.477  | NDBC | 42059   | B42059_atm            |
| <i>Buoy #42060</i>                         | 16.433   | -63.331  | NDBC | 42060   | B42060_atm            |
| <i>Buoy #41040</i>                         | 14.542   | -53.341  | NDBC | 41040   | B41040_atm            |
| <i>Buoy #41052</i>                         | 18.249   | -64.763  | NDBC | 41052   | B41052_atm            |
| <i>Buoy #41056</i>                         | 18.261   | -65.464  | NDBC | 41056   | B41056_atm            |
| <i>Buoy #42085</i>                         | 17.869   | -66.532  | NDBC | 42085   | B42085_atm            |
| <i>Wrightsville Beach, NC, USA</i>         | 34.21333 | -77.7867 | NOAA | 8658163 | WrightsvilleBeach_atm |
| <i>Beaufort, NC, USA</i>                   | 34.72    | -76.67   | NOAA | 8656483 | Beaufort_atm          |
| <i>Ocean City Inlet, MD, USA</i>           | 38.32833 | -75.0917 | NOAA | 8570283 | OceanCityInlet_atm    |
| <i>Lewes, DE, USA</i>                      | 38.78167 | -75.12   | NOAA | 8557380 | Lewes_atm             |
| <i>Cape May, NJ, USA</i>                   | 38.9683  | -74.96   | NOAA | 8536110 | CapeMay_atm           |
| <i>Atlantic City, NJ, USA</i>              | 39.355   | -74.4183 | NOAA | 8534720 | AtlanticCity_atm      |

|                                          |          |          |       |            |                  |
|------------------------------------------|----------|----------|-------|------------|------------------|
| <i>Woods Hole, MA, USA</i>               | 41.5233  | -70.6717 | NOAA  | 8447930    | WoodsHole_atm    |
| <i>Nantucket, MA, USA</i>                | 41.285   | -70.0967 | NOAA  | 8449130    | Nantucket_atm    |
| <i>Cutler Farris, ME, USA</i>            | 44.65667 | -67.205  | NOAA  | 8411060    | CutlerFarris_atm |
| <i>Ginostra, Italy (ISPRA-02)</i>        | 38.78518 | 15.19177 | ISPRA | ISPRA-02   | ISPRA02_atm      |
| <i>Salerno, Italy (ISPRA-03)</i>         | 40.67664 | 14.75084 | ISPRA | ISPRA-03   | ISPRA03_atm      |
| <i>Raveena, Italy (ISPRA-05)</i>         | 44.49137 | 12.28296 | ISPRA | ISPRA-05   | ISPRA05_atm      |
| <i>La Spezia, Italy (ISPRA-06)</i>       | 44.09661 | 9.857644 | ISPRA | ISPRA-06   | ISPRA06_atm      |
| <i>Cagliari, Italy (ISPRA-07)</i>        | 39.21019 | 9.114272 | ISPRA | ISPRA-07   | ISPRA07_atm      |
| <i>Crotone, Italy (ISPRA-08)</i>         | 39.08161 | 17.13704 | ISPRA | ISPRA-08   | ISPRA08_atm      |
| <i>Reggio Calabria, Italy (ISPRA-09)</i> | 38.12172 | 15.64892 | ISPRA | ISPRA-09   | ISPRA09_atm      |
| <i>Messina, Italy (ISPRA-10)</i>         | 38.19632 | 15.56351 | ISPRA | ISPRA-10   | ISPRA10_atm      |
| <i>Lampedusa, Italy (ISPRA-11)</i>       | 35.5     | 12.604   | ISPRA | ISPRA-11   | ISPRA11_atm      |
| <i>Sciacca, Italy (ISPRA-12)</i>         | 37.50454 | 13.07646 | ISPRA | ISPRA-12   | ISPRA12_atm      |
| <i>Imperia, Italy (ISPRA-13)</i>         | 43.87834 | 8.0188   | ISPRA | ISPRA-13   | ISPRA13_atm      |
| <i>Marina di Campo, Italy (ISPRA-14)</i> | 37.50454 | 10.53333 | ISPRA | ISPRA-14   | ISPRA14_atm      |
| <i>Otranto, Italy (ISPRA-15)</i>         | 40.146   | 18.497   | ISPRA | ISPRA-15   | ISPRA15_atm      |
| <i>Porto Empedocle, Italy (ISPRA-16)</i> | 37.1725  | 13.3128  | ISPRA | ISPRA-16   | ISPRA16_atm      |
| <i>Carloforte, Italy (ISPRA-17)</i>      | 39.0837  | 8.1829   | ISPRA | ISPRA-17   | ISPRA17_atm      |
| <i>Gaeta, Italy (ISPRA-37)</i>           | 41.20999 | 13.58974 | ISPRA | ISPRA-37   | ISPRA37_atm      |
| <i>Malta (Gozo)</i>                      | 36.0249  | 14.3018  | ISPRA | MALTA-mgrr | MaltaGozo        |

203 **Table S3** Inventory of “bad” stations where no tsunami could be clearly observed or was too  
204 small to analyze, locations are shown in Supplementary Figure S1. Given are station names,  
205 latitude/longitude, and status of gauge with reason for non-detection. Status categories and colors  
206 used in Supplementary Figure S1 are: 1) good data with a small signal suggested, but too small  
207 to analyze (dark blue); 2) good data, but uncertain results, which was either due to too much  
208 noise, the presence of storms, or under-sampled data, i.e., 5-min or longer time resolution (light  
209 blue); 3) instrumental errors (red); 4) missing data (black); and 5) good data, but no tsunami  
210 signal detected (yellow).  
211

| <u>Name</u>                                | <u>Latitude</u> | <u>Longitude</u> | <u>Status</u>      |
|--------------------------------------------|-----------------|------------------|--------------------|
| <i>Kanton, Kiribati</i>                    | -2.8010         | -171.7180        | instrument issues  |
| <i>Kapingamarangi</i>                      | 1.0780          | 154.8067         | instrument issues  |
| <i>Lifou, New Caledonia</i>                | -20.9185        | 167.2787         | instrument issues  |
| <i>Raoul Island Boat Cove, New Zealand</i> | -29.2800        | -177.8940        | instrument issues  |
| <i>Majuro, Marshall Islands</i>            | 7.1060          | 171.3730         | missing data       |
| <i>Malakal, Palau</i>                      | 7.3282          | 134.4502         | instrument issues  |
| <i>Yap Island, Micronesia</i>              | 9.5142          | 138.1246         | instrument issues  |
| <i>Lata Wharf, Solomon Islands</i>         | -10.7208        | 165.8019         | no data            |
| <i>Mare, New Caledonia</i>                 | -21.5478        | 167.8771         | no data            |
| <i>Minamitorishima, Japan</i>              | 24.2822         | 153.9783         | missing data       |
| <i>Groote Eylandt, Australia</i>           | -13.8600        | 136.4158         | small, no analysis |
| <i>Thevenard, Australia</i>                | -32.1489        | 133.6413         | uncertain (noisy)  |
| <i>Darwin, Australia</i>                   | -12.4719        | 130.8458         | small, no analysis |
| <i>Broome, Australia</i>                   | -18.0008        | 122.2186         | uncertain (noisy)  |
| <i>Port Hedland, Australia</i>             | -20.0400        | 118.4200         | no data            |
| <i>Port Murat, Australia</i>               | -21.8167        | 114.1910         | uncertain (noisy)  |
| <i>Geraldton, Australia</i>                | -28.7631        | 114.5647         | no data            |
| <i>Cape Cuvier Wharf, Australia</i>        | -24.2206        | 113.3969         | uncertain (noisy)  |
| <i>Hillarys Harbor, Australia</i>          | -31.8255        | 115.7386         | uncertain (noisy)  |
| <i>Ambon, Indonesia</i>                    | -3.6833         | 128.1833         | instrument issues  |
| <i>Lembar, Indonesia</i>                   | -8.7309         | 116.0723         | instrument issues  |
| <i>Benoa, Indonesia</i>                    | -8.7666         | 115.2166         | missing data       |
| <i>Surabaya, Indonesia</i>                 | -7.2000         | 112.7406         | not detected       |
| <i>Sadeng, Indonesia</i>                   | -8.1903         | 110.7991         | missing data       |
| <i>Semarang, Indonesia</i>                 | -6.9479         | 110.4201         | uncertain (noisy)  |
| <i>Cilicap, Indonesia</i>                  | -7.7500         | 109.0000         | small, no analysis |
| <i>Jakarta Port, Indonesia</i>             | -6.1067         | 106.8908         | small, no analysis |

|                                    |          |          |                    |
|------------------------------------|----------|----------|--------------------|
| <i>Marina Jambu, Indonesia</i>     | -6.1893  | 105.8411 | no data            |
| <i>Sebesi, Indonesia</i>           | -5.9360  | 105.5121 | missing data       |
| <i>Christmas Island, Australia</i> | -10.4294 | 105.6694 | small, no analysis |
| <i>Cocos Island, Australia</i>     | -12.1167 | 96.8919  | small, no analysis |
| <i>Bitung, Indonesia</i>           | 1.4389   | 125.1904 | missing data       |
| <i>Kudat, Malaysia</i>             | 6.8779   | 116.8460 | not detected       |
| <i>Bungus, Indonesia</i>           | -1.0297  | 100.3962 | missing data       |
| <i>Padang, Malaysia</i>            | -0.9500  | 100.3667 | missing data       |
| <i>Kerachut, Pedang, Malaysia</i>  | 5.4510   | 100.1822 | uncertain (noisy)  |
| <i>Porto Malai, Malaysia</i>       | 6.2571   | 99.7344  | not detected       |
| <i>Port Blair, India</i>           | 11.6800  | 92.7600  | not detected       |
| <i>Chittagong, Bangladesh</i>      | 22.3333  | 91.8250  | missing data       |
| <i>Vung Tau, Vietnam</i>           | 10.3400  | 107.0710 | not detected       |
| <i>Qui Nhon, Vietnam</i>           | 13.7751  | 109.2543 | instrument issues  |
| <i>Nancowry, India</i>             | 8.0500   | 93.5500  | not detected       |
| <i>Langkawi, Malaysia</i>          | 6.4160   | 99.7667  | not detected       |
| <i>Legaspi, Philippines</i>        | 13.1462  | 123.7581 | not detected       |
| <i>Lubang, Philippines</i>         | 13.8184  | 120.2022 | instrument issues  |
| <i>Manila, Philippines</i>         | 14.5822  | 120.9716 | not detected       |
| <i>Subic Bay, Philippines</i>      | 14.8167  | 120.2833 | instrument issues  |
| <i>Currimao, Philippines</i>       | 18.0167  | 120.4833 | uncertain (noisy)  |
| <i>Zhapo, China</i>                | 21.5800  | 111.8200 | small, no analysis |
| <i>Busan, Korea</i>                | 35.0931  | 129.0375 | missing data       |
| <i>Hamada, Japan</i>               | 34.9000  | 132.0700 | not detected       |
| <i>Saigo, Japan</i>                | 36.2000  | 133.3300 | not detected       |
| <i>Toyama, Japan</i>               | 36.7600  | 137.2200 | not detected       |
| <i>Noto, Japan</i>                 | 37.5000  | 137.1600 | not detected       |
| <i>Sado, Japan</i>                 | 38.3200  | 138.5200 | not detected       |
| <i>Fukuara, Japan</i>              | 40.6500  | 139.9300 | not detected       |
| <i>Wakkanai, Japan</i>             | 45.4100  | 141.6900 | not detected       |
| <i>Pos'et, Russia</i>              | 42.6500  | 130.8000 | instrument issues  |
| <i>Vladivostak, Russia</i>         | 43.1300  | 131.9200 | small, no analysis |
| <i>Nahodka, Russia</i>             | 42.7800  | 132.8600 | small, no analysis |
| <i>Sosunovo, Russia</i>            | 46.5300  | 138.3300 | instrument issues  |
| <i>Sovetskaja Gavan', Russia</i>   | 48.9700  | 140.2900 | small, no analysis |
| <i>Petropavlovsk, Russia</i>       | 53.0167  | 158.6500 | small, no analysis |

|                                           |          |           |                                 |
|-------------------------------------------|----------|-----------|---------------------------------|
| <i>Alofi Niue, Niue</i>                   | -19.0527 | -169.9209 | no data                         |
| <i>Isla Clarion, Mexico</i>               | 18.5338  | -114.7227 | no data                         |
| <i>Mapelo, Columbia</i>                   | 4.0024   | -81.6042  | instrument issues               |
| <i>Nome, AK, USA</i>                      | 64.5000  | -165.4300 | small, no analysis              |
| <i>Prudhoe Bay, AK, USA</i>               | 70.3880  | -148.5100 | small, no analysis              |
| <i>Red Dog Dock, AK, USA</i>              | 67.0650  | -164.0650 | no data                         |
| <i>Port Moller, AK, USA</i>               | 55.9850  | -160.5733 | small, no analysis              |
| <i>Seldovia, AK, USA</i>                  | 59.4405  | -151.7199 | small, no analysis              |
| <i>Nikiski, AK, USA</i>                   | 60.6833  | -151.3980 | small, no analysis              |
| <i>Anchorage, AK, USA</i>                 | 61.2380  | -149.8880 | no data                         |
| <i>Valdez, AK, USA</i>                    | 61.1250  | -146.3620 | small, no analysis              |
| <i>Cordova, AK, USA</i>                   | 60.5583  | -145.7550 | small, no analysis              |
| <i>Ketchikan, AK, USA</i>                 | 55.3318  | -131.6262 | small, no analysis              |
| <i>Langra Point, Canada</i>               | 54.2000  | -133.1000 | small, no analysis              |
| <i>Queen Charlotte, Canada</i>            | 53.2500  | -132.0667 | not detected                    |
| <i>Prince Rupert, Canada</i>              | 54.3167  | -130.3167 | not detected                    |
| <i>Bella Bella, Canada</i>                | 52.1600  | -128.1400 | not detected                    |
| <i>Campbell River, Canada</i>             | 50.0400  | -125.2500 | not detected                    |
| <i>Vancouver, Canada</i>                  | 49.2833  | -123.1167 | not detected                    |
| <i>Cherry Point, WA, USA</i>              | 48.8630  | -122.7580 | not detected                    |
| <i>La Union, El Salvador</i>              | 13.3093  | -87.8181  | missing data                    |
| <i>Puerto San Juan del Sur, Nicaragua</i> | 11.2510  | -85.8750  | no data                         |
| <i>Buenaventura, Colombia</i>             | 3.8906   | -77.0808  | not detected                    |
| <i>Tumaco, Colombia</i>                   | 1.8200   | -78.7287  | instrument issues               |
| <i>Talara, Peru</i>                       | -4.5778  | -81.2798  | instrument issues               |
| <i>Puerto Montt, Chile</i>                | -41.4847 | -72.9612  | not detected                    |
| <i>Puerto Aguire, Chile</i>               | -45.1617 | -73.5274  | not detected                    |
| <i>Puerto Chacabuco, Chile</i>            | -45.4671 | -72.8200  | not detected                    |
| <i>Caleta Meteoro, Chile</i>              | -52.9600 | -74.0660  | not detected                    |
| <i>Punta Arenas, Chile</i>                | -53.1237 | -70.8620  | small, no analysis              |
| <i>Bahia Gregorio, Chile</i>              | -52.6482 | -70.2092  | not detected                    |
| <i>Rothera, Antarctica</i>                | -67.5667 | -68.1333  | no data                         |
| <i>Stanley, UK</i>                        | -51.7500 | -57.9333  | not detected                    |
| <i>Syowa Station, Antarctica</i>          | -69.0078 | 39.5703   | uncertain (undersampled, 5-min) |
| <i>St Helena</i>                          | -15.9179 | -5.7144   | no data                         |
| <i>Puerto Deseado, Argentina</i>          | -47.7536 | -65.9147  | not detected                    |

|                                                 |          |          |                                 |
|-------------------------------------------------|----------|----------|---------------------------------|
| <i>Puerto Madryn, Argentina</i>                 | -42.7627 | -65.0307 | not detected                    |
| <i>Mar del Plata, Argentina</i>                 | -38.0002 | -57.5385 | small, no analysis              |
| <i>Salvador, Brazil</i>                         | -12.9673 | -38.5167 | not detected                    |
| <i>Fortaleza, Brazil</i>                        | -3.7167  | -38.4667 | not detected                    |
| <i>Belem, Brazil</i>                            | -1.4422  | -48.4963 | not detected                    |
| <i>Ile Royale, France</i>                       | 5.2844   | -52.5869 | not detected                    |
| <i>Nouakchott, Mauritania</i>                   | 18.1000  | -15.9500 | instrument issues               |
| <i>Galeota, Trinidad and Tobago</i>             | 10.1387  | -61.0020 | not detected                    |
| <i>Port of Spain, Trinidad and Tobago</i>       | 10.6500  | -61.5167 | small, no analysis              |
| <i>Bullen Bay, Curaçao</i>                      | 12.1873  | -69.0196 | small, no analysis              |
| <i>Santa Marta, Colombia</i>                    | 11.2352  | -74.2216 | small, no analysis              |
| <i>Cartagena, Colombia</i>                      | 10.3914  | -75.5369 | no data                         |
| <i>Isla Naval, Colombia</i>                     | 10.1806  | -75.7503 | instrument issues               |
| <i>Sapzurro, Colombia</i>                       | 8.6603   | -77.3653 | uncertain (noisy)               |
| <i>El Porvenir, Panama</i>                      | 9.5583   | -78.9492 | small, no analysis              |
| <i>Bocas del Toro, Panama</i>                   | 9.3509   | -82.2577 | not detected                    |
| <i>San Andres, Colombia</i>                     | 12.5695  | -81.7015 | small, no analysis              |
| <i>Puerto Barrios, Guatemala</i>                | 15.6946  | -88.6220 | small, no analysis              |
| <i>La Ceiba Cabotage, Honduras</i>              | 15.7900  | -86.7600 | no data                         |
| <i>Puerto Morelos, Mexico</i>                   | 20.8681  | -86.8668 | uncertain (noisy)               |
| <i>Isla Mujeres, Mexico</i>                     | 21.2547  | -86.7461 | no data                         |
| <i>Gun Bay, Cayman Islands</i>                  | 19.3123  | -81.0895 | no data                         |
| <i>Georgetown, Cayman Islands</i>               | 19.2951  | -81.3834 | no data                         |
| <i>Little Cayman, Cayman Islands</i>            | 19.6679  | -80.1041 | no data                         |
| <i>Cayman Brac, Cayman Islands</i>              | 19.7432  | -79.7699 | no data                         |
| <i>Jeremie, Haiti</i>                           | 18.6430  | -74.1100 | no data                         |
| <i>Cap-Haitien, Haiti</i>                       | 19.7593  | -72.1934 | no data                         |
| <i>Grand Turk, Turks and Caicos Islands</i>     | 21.4335  | -71.1495 | no data                         |
| <i>Sapodilla Bay, Turks and Caicos Islands</i>  | 21.7412  | -72.2849 | no data                         |
| <i>St Croix, US Virgin Islands</i>              | 17.7467  | -64.6983 | instrument issues               |
| <i>Culebra Island, Puerto Rico</i>              | 18.3008  | -65.3028 | uncertain (undersampled; 6-min) |
| <i>San Juan, Puerto Rico</i>                    | 18.4617  | -66.1167 | instrument issues               |
| <i>Arecibo, Puerto Rico</i>                     | 18.4805  | -66.7024 | instrument issues               |
| <i>Guaynilla, Puerto Rico</i>                   | 18.0052  | -66.7667 | instrument issues               |
| <i>Prickly Bay, Grenada</i>                     | 12.0054  | -61.7648 | small, no analysis              |
| <i>Chateaubelair, St Vincent and Grenadines</i> | 13.2911  | -61.2406 | no data                         |

|                                         |         |          |                    |
|-----------------------------------------|---------|----------|--------------------|
| <i>Soufriere, St Lucia</i>              | 13.8535 | -61.0596 | small, no analysis |
| <i>Ganters Bay, St Lucia</i>            | 14.0164 | -60.9974 | small, no analysis |
| <i>Le Robert, Martinique</i>            | 14.6769 | -60.9379 | instrument issues  |
| <i>Le Precheur, Martinique</i>          | 14.8076 | -61.2266 | small, no analysis |
| <i>Roseau, Dominica</i>                 | 15.3139 | -61.3892 | small, no analysis |
| <i>La Desirade, Guadeloupe</i>          | 16.3029 | -61.0725 | instrument issues  |
| <i>Pointe a Pitre, Guadeloupe</i>       | 16.2244 | -61.5315 | instrument issues  |
| <i>Sisal, Mexico</i>                    | 21.1617 | -90.0483 | no data            |
| <i>Telchac, Mexico</i>                  | 21.3400 | -89.3083 | no data            |
| <i>Celestun, Mexico</i>                 | 20.8645 | -90.4051 | no data            |
| <i>Lerma Campeche, Mexico</i>           | 19.8120 | -90.5949 | no data            |
| <i>Sanchez Magallanes, Mexico</i>       | 18.2968 | -93.8546 | small, no analysis |
| <i>Alvarado, Mexico</i>                 | 18.7662 | -95.7560 | small, no analysis |
| <i>Veracruz, Mexico</i>                 | 19.1921 | -96.1236 | instrument issues  |
| <i>Port Isabel, TX, USA</i>             | 26.0612 | -97.2155 | uncertain (noisy)  |
| <i>Brazos Santiago, TX, USA</i>         | 26.0674 | -97.1548 | uncertain (noisy)  |
| <i>South Padre Island, TX, USA</i>      | 26.0731 | -97.1675 | uncertain (noisy)  |
| <i>Realitos Peninsula, TX, USA</i>      | 26.2617 | -97.2850 | not detected       |
| <i>Port Mansfield, TX, USA</i>          | 26.5576 | -97.4257 | not detected       |
| <i>Rincon del San Jose, TX, USA</i>     | 26.8012 | -97.4706 | not detected       |
| <i>Baffin Bay, TX, USA</i>              | 27.2970 | -97.4052 | small, no analysis |
| <i>S Bird Island, TX, USA</i>           | 27.4844 | -97.3181 | small, no analysis |
| <i>Bob Hall Pier, CC, TX, USA</i>       | 27.5800 | -97.2167 | small, no analysis |
| <i>Packery Channel, TX, USA</i>         | 27.6333 | -97.2367 | uncertain (noisy)  |
| <i>USS Lexington, CC, TX, USA</i>       | 27.8149 | -97.3892 | small, no analysis |
| <i>Viola Turning Basin, CC, TX, USA</i> | 27.8467 | -97.5200 | small, no analysis |
| <i>Ingleside, MODA, TX, USA</i>         | 27.8217 | -97.2033 | no data            |
| <i>Port Aransas, TX, USA</i>            | 27.8397 | -97.0725 | uncertain (noisy)  |
| <i>Aransas, TX, USA</i>                 | 28.2276 | -96.7966 | uncertain (noisy)  |
| <i>Rockport, TX, USA</i>                | 28.0217 | -97.0467 | uncertain (noisy)  |
| <i>Aransas WR, TX, USA</i>              | 28.2283 | -97.7950 | uncertain (noisy)  |
| <i>Seadrift, TX, USA</i>                | 28.4067 | -97.7117 | small, no analysis |
| <i>Matagorda Bay, TX, USA</i>           | 28.4269 | -96.3301 | uncertain (noisy)  |
| <i>Port O'Connor, TX, USA</i>           | 28.4356 | -96.3856 | no data            |
| <i>Port Lavaca, TX, USA</i>             | 28.6344 | -96.6011 | uncertain (noisy)  |
| <i>Matagorda City, TX, USA</i>          | 28.7101 | -95.9140 | uncertain (noisy)  |

|                                          |         |          |                    |
|------------------------------------------|---------|----------|--------------------|
| <i>Sargent, TX, USA</i>                  | 28.7714 | -95.6172 | uncertain (noisy)  |
| <i>Freeport Harbor, TX, USA</i>          | 28.9433 | -95.3025 | uncertain (noisy)  |
| <i>San Luis Pass, TX, USA</i>            | 29.0810 | -95.1313 | small, no analysis |
| <i>Galveston Pier 21, TX, USA</i>        | 29.3100 | -94.7930 | uncertain (noisy)  |
| <i>Galveston Bay N Jetty, TX, USA</i>    | 29.3573 | -94.7248 | uncertain (noisy)  |
| <i>Eagle Point, TX, USA</i>              | 29.4800 | -94.9183 | uncertain (noisy)  |
| <i>Manchester, TX, USA</i>               | 29.7262 | -95.2658 | not detected       |
| <i>Rollover Pass, TX, USA</i>            | 29.5156 | -94.5106 | uncertain (noisy)  |
| <i>High Island, TX, USA</i>              | 29.5945 | -94.3896 | uncertain (noisy)  |
| <i>Rainbow Bridge, TX, USA</i>           | 29.9800 | -93.8817 | uncertain (noisy)  |
| <i>Port Arthur, TX, USA</i>              | 29.8671 | -93.9310 | uncertain (noisy)  |
| <i>Sabine Pass, TX, USA</i>              | 29.6894 | -93.8419 | uncertain (noisy)  |
| <i>Calcasieu Pass, LA, USA</i>           | 29.7682 | -93.3429 | uncertain (noisy)  |
| <i>Bulk Terminal, LA, USA</i>            | 30.1902 | -93.3008 | not detected       |
| <i>Lake Charles, LA, USA</i>             | 30.2016 | -93.2806 | not detected       |
| <i>Eugene Island, LA, USA</i>            | 29.3675 | -91.3839 | small, no analysis |
| <i>LAWMA (Amerada Pass), LA, USA</i>     | 29.4496 | -91.3381 | small, no analysis |
| <i>Berwick, LA, USA</i>                  | 29.6675 | -91.2376 | not detected       |
| <i>Pilots Station (SW Pass), LA, USA</i> | 28.9317 | -89.4067 | uncertain (noisy)  |
| <i>Pilotown, LA, USA</i>                 | 29.1783 | -89.2583 | uncertain (noisy)  |
| <i>Bayou Gauche, LA, USA</i>             | 29.7886 | -90.4203 | not detected       |
| <i>Bonnet Carre Floodway, LA, USA</i>    | 30.0679 | -90.3900 | not detected       |
| <i>New Canal Station, LA, USA</i>        | 30.0272 | -90.1133 | uncertain (noisy)  |
| <i>Carrollton, LA, USA</i>               | 29.9329 | -90.1355 | not detected       |
| <i>Shell Beach, LA, USA</i>              | 29.8681 | -89.6732 | uncertain (noisy)  |
| <i>Bay Waveland Yacht Club, MS, USA</i>  | 30.3264 | -89.3258 | uncertain (noisy)  |
| <i>Pascagoula (NOAA lab), MS, USA</i>    | 30.3678 | -88.5631 | uncertain (noisy)  |
| <i>Bayou La Batre Bridge, AL, USA</i>    | 30.4057 | -88.2477 | uncertain (noisy)  |
| <i>West Fowl River Bridge, AL, USA</i>   | 30.3766 | -88.1586 | uncertain (noisy)  |
| <i>East Fowl River Bridge, AL, USA</i>   | 30.4437 | -88.1139 | uncertain (noisy)  |
| <i>Dog River Bridge, AL, USA</i>         | 30.5652 | -88.0880 | uncertain (noisy)  |
| <i>Coast Guard Mobile, AL, USA</i>       | 30.6483 | -88.0583 | uncertain (noisy)  |
| <i>Mobile State Docks, AL, USA</i>       | 30.7083 | -88.0433 | uncertain (noisy)  |
| <i>Chickasaw Creek, AL, USA</i>          | 30.7819 | -88.0736 | uncertain (noisy)  |
| <i>Weeks Bay, AL, USA</i>                | 30.4169 | -87.8254 | no data            |
| <i>Dauphin Island, AL, USA</i>           | 30.2000 | -88.1000 | no data            |



|                                              |         |          |                              |
|----------------------------------------------|---------|----------|------------------------------|
| <i>Pensacola, FL, USA</i>                    | 30.4030 | -87.2120 | not detected                 |
| <i>Panama City Beach, FL, USA</i>            | 30.2133 | -85.8783 | uncertain (noisy and stormy) |
| <i>Panama City, FL, USA</i>                  | 30.1520 | -85.6670 | uncertain (noisy and stormy) |
| <i>Apalachicola, FL, USA</i>                 | 29.7270 | -84.9820 | uncertain (noisy and stormy) |
| <i>Cedar Key, FL, USA</i>                    | 29.1336 | -83.0309 | uncertain (noisy and stormy) |
| <i>Clearwater Beach, FL, USA</i>             | 27.9780 | -82.8320 | uncertain (noisy and stormy) |
| <i>East Bay, FL, USA</i>                     | 27.9133 | -82.4250 | uncertain (noisy and stormy) |
| <i>Old Port Tampa, FL, USA</i>               | 27.8578 | -82.5528 | uncertain (noisy and stormy) |
| <i>St Petersburg, FL, USA</i>                | 27.7606 | -82.6269 | uncertain (noisy and stormy) |
| <i>Port Manatee, FL, USA</i>                 | 27.6383 | -82.5625 | uncertain (noisy and stormy) |
| <i>Fort Meyers, FL, USA</i>                  | 26.6500 | -81.8700 | uncertain (noisy and stormy) |
| <i>Naples, FL, USA</i>                       | 26.1317 | -81.8075 | uncertain (noisy and stormy) |
| <i>Key West, FL, USA</i>                     | 24.5530 | -81.8080 | uncertain (noisy and stormy) |
| <i>Vaca Key, FL, USA</i>                     | 24.7110 | -81.1065 | uncertain (noisy and stormy) |
| <i>Settlement Pt, Bahamas</i>                | 26.6833 | -78.9833 | not detected                 |
| <i>St Georges Island, Bermuda</i>            | 32.3801 | -64.6762 | no data                      |
| <i>Virginia Key, FL, USA</i>                 | 25.7314 | -80.1618 | uncertain (noisy and stormy) |
| <i>South Port Everglades, FL, USA</i>        | 26.0817 | -80.1167 | uncertain (noisy and stormy) |
| <i>Lake Worth Pier, FL, USA</i>              | 26.6128 | -80.0342 | uncertain (noisy and stormy) |
| <i>Trident Pier, Port Canaveral, FL, USA</i> | 28.4158 | -80.5931 | uncertain (noisy and stormy) |
| <i>I-295 Buckman Bridge, FL, USA</i>         | 30.1917 | -81.6917 | uncertain (noisy and stormy) |
| <i>St Johns River, FL, USA</i>               | 30.3200 | -81.6583 | uncertain (noisy and stormy) |
| <i>Dames Point, FL, USA</i>                  | 30.3867 | -81.5583 | uncertain (noisy and stormy) |
| <i>Mayport, FL, USA</i>                      | 30.3982 | -81.4279 | uncertain (noisy and stormy) |
| <i>Fernandina Beach, FL, USA</i>             | 30.6720 | -81.4650 | uncertain (noisy and stormy) |
| <i>Fort Pulaski, GA, USA</i>                 | 32.0330 | -80.9020 | uncertain (noisy and stormy) |
| <i>Charleston, SC, USA</i>                   | 32.7808 | -79.9236 | uncertain (noisy and stormy) |
| <i>Oyster Landing, SC, USA</i>               | 33.3517 | -79.1867 | uncertain (noisy and stormy) |
| <i>Springmaid Pier, SC, USA</i>              | 33.6550 | -78.9183 | uncertain (noisy and stormy) |
| <i>Wilmington, NC, USA</i>                   | 34.2275 | -77.9536 | uncertain (noisy and stormy) |
| <i>Oregon Inlet Marina, NC, USA</i>          | 35.7950 | -75.5481 | uncertain (noisy and stormy) |
| <i>Duck, NC, USA</i>                         | 36.1833 | -75.7466 | uncertain (noisy and stormy) |
| <i>USCG Station, Hatteras, NC, USA</i>       | 35.2086 | -75.7042 | uncertain (noisy and stormy) |
| <i>Money Point, VA, USA</i>                  | 36.7783 | -76.3017 | uncertain (noisy and stormy) |
| <i>Sewells Pt, VA, USA</i>                   | 36.9467 | -76.3300 | uncertain (noisy and stormy) |
| <i>Chesapeake Channel, VA, USA</i>           | 36.9667 | -76.1133 | uncertain (noisy and stormy) |

|                                               |         |          |                                 |
|-----------------------------------------------|---------|----------|---------------------------------|
| <i>Kiptopeke, VA, USA</i>                     | 37.1652 | -75.9884 | small, no analysis              |
| <i>Yorktown USCG Training Center, VA, USA</i> | 37.1652 | -75.9884 | uncertain (noisy and stormy)    |
| <i>Wachapreague, VA, USA</i>                  | 37.6078 | -75.6858 | uncertain (noisy and stormy)    |
| <i>Windmill Pt, VA, USA</i>                   | 37.6162 | -76.2900 | uncertain (noisy and stormy)    |
| <i>Lewisetta, VA, USA</i>                     | 37.9961 | -76.4644 | no data                         |
| <i>Bishops Head, MD, USA</i>                  | 38.2204 | -76.0387 | uncertain (noisy and stormy)    |
| <i>Solomons Island, MD, USA</i>               | 38.3172 | -76.4508 | uncertain (noisy and stormy)    |
| <i>Dahlgren, VA, USA</i>                      | 38.3198 | -77.0366 | not detected                    |
| <i>Washington, DC, USA</i>                    | 38.8733 | -77.0217 | not detected                    |
| <i>Cambridge, MD, USA</i>                     | 38.5733 | -76.0683 | not detected                    |
| <i>Annapolis, MD, USA</i>                     | 38.9833 | -76.4816 | not detected                    |
| <i>Baltimore, MD, USA</i>                     | 39.2670 | -76.5780 | not detected                    |
| <i>Tolchester Beach, MD, USA</i>              | 39.2133 | -76.2450 | uncertain (noisy and stormy)    |
| <i>Chesapeake City, MD, USA</i>               | 39.5267 | -75.8100 | uncertain (noisy and stormy)    |
| <i>Brandywine Shoal Light, DE, USA</i>        | 38.9867 | -75.1133 | small, no analysis              |
| <i>Ship John Shoal, NJ, USA</i>               | 39.3050 | -75.3750 | uncertain (noisy and stormy)    |
| <i>Reedy Point, DE, USA</i>                   | 39.5583 | -75.5733 | uncertain (noisy and stormy)    |
| <i>Delaware City, DE, USA</i>                 | 39.5817 | -75.5883 | no data                         |
| <i>Marcus Hook, PA, USA</i>                   | 39.8117 | -75.4094 | uncertain (noisy and stormy)    |
| <i>Philadelphia, PA, USA</i>                  | 39.9333 | -75.1417 | no data                         |
| <i>Bridesbuerg, PA, USA</i>                   | 39.9833 | -75.0750 | uncertain (noisy and stormy)    |
| <i>Burlington, NJ, USA</i>                    | 40.0800 | -74.8733 | no data                         |
| <i>Newbold, NJ, USA</i>                       | 40.1373 | -74.7519 | no data                         |
| <i>Sandy Hook, NJ, USA</i>                    | 40.4669 | -74.0094 | uncertain (noisy and stormy)    |
| <i>Bergen Point, NY, USA</i>                  | 40.6367 | -74.1417 | uncertain (noisy and stormy)    |
| <i>The Battery, NY, USA</i>                   | 40.7000 | -74.0200 | uncertain (noisy and stormy)    |
| <i>Kings Point, NY, USA</i>                   | 40.8103 | -73.7650 | uncertain (noisy and stormy)    |
| <i>Bridgeport, CT, USA</i>                    | 41.1733 | -73.1816 | uncertain (undersampled, 6 min) |
| <i>New Haven, CT, USA</i>                     | 41.2833 | -72.9083 | small, no analysis              |
| <i>New London, CT, USA</i>                    | 41.3550 | -72.0867 | small, no analysis              |
| <i>Montauk, NY, USA</i>                       | 41.0483 | -71.9600 | uncertain (noisy and stormy)    |
| <i>Newport, RI, USA</i>                       | 41.5050 | -71.3267 | small, no analysis              |
| <i>Quonset Pt, RI, USA</i>                    | 41.5868 | -71.4110 | uncertain (undersampled, 6 min) |
| <i>Conimicut Light, RI, USA</i>               | 41.7167 | -71.3433 | uncertain (noisy and stormy)    |
| <i>Providence, RI, USA</i>                    | 41.8067 | -71.4006 | small, no analysis              |
| <i>Fall River, MA, USA</i>                    | 41.7043 | -71.1641 | uncertain (undersampled, 6 min) |

|                                         |         |          |                                  |
|-----------------------------------------|---------|----------|----------------------------------|
| <i>Boston, MA, USA</i>                  | 42.3550 | -71.0516 | uncertain (noisy and stormy)     |
| <i>Chatham, MA, USA</i>                 | 41.6885 | -69.9511 | small, no analysis               |
| <i>Fort Point, NH, USA</i>              | 43.0714 | -70.7106 | uncertain (noisy and stormy)     |
| <i>Seavey Island, ME, USA</i>           | 43.0800 | -70.7417 | small, no analysis               |
| <i>Wells, ME, USA</i>                   | 43.3200 | -70.5633 | uncertain (undersampled, 6 min)  |
| <i>Portland, ME, USA</i>                | 43.6566 | -70.2466 | uncertain (noisy and stormy)     |
| <i>Bar Harbor, ME, USA</i>              | 44.3916 | -68.2050 | uncertain (noisy and stormy)     |
| <i>Cutler Farris Wharf, ME, USA</i>     | 44.6567 | -67.2100 | uncertain (undersampled, 6 min)  |
| <i>Eastport, ME, USA</i>                | 44.9033 | -66.9850 | missing data                     |
| <i>Saint Pierre et Miquelon, Canada</i> | 46.7788 | -56.1683 | uncertain (noisy)                |
| <i>Nain, Canada</i>                     | 56.5500 | -61.6800 | uncertain (noisy)                |
| <i>Qaqortoq, Greenland</i>              | 60.7176 | -46.0350 | small, no analysis               |
| <i>Nuuk Harbor, Greenland</i>           | 64.1713 | -51.7198 | uncertain (undersampled, 5 min)  |
| <i>Thule, Greenland</i>                 | 76.5434 | -68.8626 | uncertain (undersampled, 5 min)  |
| <i>Alert, Canada</i>                    | 82.4900 | -62.3200 | missing data                     |
| <i>Ittoqqortoormiit, Greenland</i>      | 70.4838 | -21.9620 | uncertain (undersampled, 5 min)  |
| <i>Reykjavik, Iceland</i>               | 64.1500 | -21.9333 | no data                          |
| <i>Ny Alesund, Norway</i>               | 78.9333 | 11.9500  | uncertain (undersampled, 10 min) |
| <i>Vardo, Norway</i>                    | 70.3333 | 31.1000  | uncertain (undersampled, 10 min) |
| <i>Honningsvåg, Norway</i>              | 70.9833 | 25.9833  | uncertain (undersampled, 10 min) |
| <i>Andenes, Norway</i>                  | 69.3167 | 16.1500  | uncertain (undersampled, 10 min) |
| <i>Rorvik, Norway</i>                   | 64.8667 | 11.2500  | uncertain (undersampled, 10 min) |
| <i>Måløy, Norway</i>                    | 61.9333 | 5.1167   | uncertain (undersampled, 10 min) |
| <i>Tregde, Norway</i>                   | 58.0000 | 7.5667   | uncertain (undersampled, 10 min) |
| <i>Kungsvik, Sweden</i>                 | 58.9967 | 11.1272  | not detected                     |
| <i>Somgen, Sweden</i>                   | 58.3536 | 11.2178  | not detected                     |
| <i>Brofjorden, Sweden</i>               | 58.3361 | 11.4047  | not detected                     |
| <i>Uddevalla, Sweden</i>                | 58.3475 | 11.8947  | not detected                     |
| <i>Stenungsund, Sweden</i>              | 58.0933 | 11.8325  | not detected                     |
| <i>Marstrand, Sweden</i>                | 57.8869 | 11.5936  | not detected                     |
| <i>Vinga, Sweden</i>                    | 57.6317 | 11.6089  | not detected                     |
| <i>Goteborg (Torshammen), Sweden</i>    | 57.6847 | 11.7906  | not detected                     |
| <i>Onsala, Sweden</i>                   | 57.3919 | 11.9192  | not detected                     |
| <i>Ringhals, Sweden</i>                 | 57.2497 | 12.1125  | no data                          |
| <i>Varberg, Sweden</i>                  | 57.1111 | 12.2386  | not detected                     |
| <i>Falkenberg, Sweden</i>               | 56.8919 | 12.4894  | not detected                     |

|                                           |         |         |                                  |
|-------------------------------------------|---------|---------|----------------------------------|
| <i>Halmstad, Sweden</i>                   | 56.6497 | 12.8425 | not detected                     |
| <i>Viken, Sweden</i>                      | 56.1422 | 12.5792 | not detected                     |
| <i>Helsingborg, Sweden</i>                | 56.0447 | 12.6872 | not detected                     |
| <i>Barseback, Sweden</i>                  | 55.7564 | 12.9033 | not detected                     |
| <i>Malmo Hamn, Sweden</i>                 | 55.6136 | 12.9975 | not detected                     |
| <i>Klagshamn, Sweden</i>                  | 55.5222 | 12.8936 | not detected                     |
| <i>Skonor, Sweden</i>                     | 55.4167 | 12.8297 | not detected                     |
| <i>Hirtshals, Denmark</i>                 | 57.6000 | 9.9700  | uncertain (undersampled, 10 min) |
| <i>Hörnum, Germany</i>                    | 54.7581 | 8.2975  | uncertain (noisy)                |
| <i>Helgoland Binnenhafen, Germany</i>     | 54.1758 | 7.8914  | uncertain (noisy)                |
| <i>Cuxhaven, Germany</i>                  | 53.8678 | 8.7175  | uncertain (noisy)                |
| <i>Borkum Fischerbalje, Germany</i>       | 53.5575 | 6.7494  | uncertain (noisy)                |
| <i>Delfzijl, Netherlands</i>              | 53.3266 | 6.9330  | small, no analysis               |
| <i>Terschelling Noordzee, Netherlands</i> | 53.4278 | 5.3328  | uncertain (undersampled, 10 min) |
| <i>Harlingen, Netherlands</i>             | 53.1756 | 5.4110  | uncertain (undersampled, 10 min) |
| <i>Den Helder, Netherlands</i>            | 52.9637 | 4.7434  | uncertain (undersampled, 10 min) |
| <i>Scheveningen, Netherlands</i>          | 52.0989 | 4.2632  | uncertain (undersampled, 10 min) |
| <i>Hoek van Holland, Netherlands</i>      | 51.9775 | 4.1195  | uncertain (undersampled, 10 min) |
| <i>Europlatform, Netherlands</i>          | 51.9977 | 3.2747  | uncertain (undersampled, 10 min) |
| <i>Vlatke v/d Raan, Netherlands</i>       | 51.5036 | 3.2417  | uncertain (undersampled, 10 min) |
| <i>Vlissingen, Netherlands</i>            | 51.4429 | 3.5970  | uncertain (undersampled, 10 min) |
| <i>Terneuzen, Netherlands</i>             | 51.3362 | 3.8195  | uncertain (undersampled, 10 min) |
| <i>Ostend, Belgium</i>                    | 51.2331 | 2.9206  | uncertain (undersampled, 5 min)  |
| <i>Dunkerque, France</i>                  | 51.0481 | 2.3667  | uncertain (noisy)                |
| <i>Calais, France</i>                     | 50.9690 | 1.8680  | uncertain (noisy)                |
| <i>Boulogne-Sur-Mer, France</i>           | 50.7270 | 1.5770  | uncertain (noisy)                |
| <i>Dieppe, France</i>                     | 49.9300 | 1.0850  | uncertain (noisy)                |
| <i>Le Havre, France</i>                   | 49.4819 | 0.1060  | uncertain (noisy)                |
| <i>Ouisterham, France</i>                 | 49.2794 | -0.2490 | uncertain (noisy)                |
| <i>Cherbourg, France</i>                  | 49.6500 | -1.6300 | small, no analysis               |
| <i>Dielette, France</i>                   | 49.5500 | -1.8600 | uncertain (noisy)                |
| <i>Jersey, UK</i>                         | 49.1800 | -2.1200 | uncertain (undersampled, 15 min) |
| <i>St Malo, France</i>                    | 48.6420 | -2.0280 | uncertain (noisy)                |
| <i>Saint-Quay-Portrieux, France</i>       | 48.6482 | -2.8225 | uncertain (noisy)                |
| <i>Roscoff, France</i>                    | 48.7160 | -3.9660 | uncertain (noisy)                |
| <i>Le Conquet, France</i>                 | 48.3600 | -4.7800 | small, no analysis               |

|                                       |         |          |                    |
|---------------------------------------|---------|----------|--------------------|
| <i>Brest, France</i>                  | 48.3800 | -4.5000  | small, no analysis |
| <i>Audierren, France</i>              | 48.0216 | -4.5372  | uncertain (noisy)  |
| <i>Port Tudy, France</i>              | 47.6439 | -3.4471  | small, no analysis |
| <i>Le Crouesty, France</i>            | 47.5430 | -2.8950  | small, no analysis |
| <i>Saint Nazaire, France</i>          | 47.2600 | -2.2000  | uncertain (noisy)  |
| <i>L'Herbaudière, France</i>          | 47.0260 | -2.2990  | uncertain (noisy)  |
| <i>Les Sables d'Olonne, France</i>    | 46.4975 | -1.7937  | uncertain (noisy)  |
| <i>La Rochelle-Pallice, France</i>    | 46.1585 | -1.2207  | small, no analysis |
| <i>Ile d'Aix, France</i>              | 46.0074 | -1.1742  | uncertain (noisy)  |
| <i>Port Bloc, France</i>              | 45.5690 | -1.0620  | uncertain (noisy)  |
| <i>Arcachon Eyrac, France</i>         | 44.6650 | -1.1640  | uncertain (noisy)  |
| <i>Mimizan, France</i>                | 44.2107 | -1.2951  | instrument issues  |
| <i>Boucau-Bayonne, France</i>         | 43.5273 | -1.5148  | uncertain (noisy)  |
| <i>Socoa, France</i>                  | 43.3952 | -1.6816  | uncertain (noisy)  |
| <i>Bilbao, Spain</i>                  | 43.3600 | -3.0500  | no data            |
| <i>Satander, Spain</i>                | 43.4613 | -3.7908  | no data            |
| <i>Gijon, Spain</i>                   | 43.5580 | -5.6984  | no data            |
| <i>Ferrol, Spain</i>                  | 43.4600 | -8.3300  | no data            |
| <i>A Coruna, Spain</i>                | 43.3573 | -8.3894  | no data            |
| <i>Langosteira, Spain</i>             | 43.3465 | -8.5301  | no data            |
| <i>Vilagarcia, Spain</i>              | 42.6007 | -8.7700  | no data            |
| <i>Marin, Spain</i>                   | 42.4061 | -8.6911  | no data            |
| <i>Vigo, Spain</i>                    | 42.2431 | -8.7260  | no data            |
| <i>Cascais, Portugal</i>              | 38.6932 | -9.4154  | instrument issues  |
| <i>Lagos, Portugal</i>                | 37.0988 | -8.6668  | instrument issues  |
| <i>Arrafiana, Portugal (ISDL-08)</i>  | 37.2956 | -8.8694  | instrument issues  |
| <i>Algarve, Portugal (IPMA-IGLAG)</i> | 37.0988 | -8.6668  | uncertain (noisy)  |
| <i>Albufiera, Portugal (ISDL-05)</i>  | 37.0826 | -8.2604  | uncertain (noisy)  |
| <i>Huelva, Spain</i>                  | 37.1320 | -6.8337  | no data            |
| <i>Sevilla, Spain</i>                 | 37.3185 | -6.0077  | no data            |
| <i>Bonanza, Spain</i>                 | 36.8022 | -6.3381  | no data            |
| <i>Arrecife, Spain</i>                | 28.9719 | -13.5301 | no data            |
| <i>Fuerteventura, Spain</i>           | 28.4925 | -13.8582 | no data            |
| <i>Puerto de la Luz, Spain</i>        | 28.1300 | -15.4100 | no data            |
| <i>Tenerife, Spain</i>                | 28.4772 | -16.2411 | no data            |
| <i>Arona, Spain</i>                   | 28.0469 | -16.7181 | no data            |

|                                       |         |          |                    |
|---------------------------------------|---------|----------|--------------------|
| <i>La Gomera, Spain</i>               | 28.0878 | -17.1083 | no data            |
| <i>El Hierro, Spain</i>               | 27.7841 | -17.9016 | no data            |
| <i>Las Palmas, Spain</i>              | 28.6778 | -17.7680 | no data            |
| <i>Puerto de Tazacorte, Spain</i>     | 28.6409 | -17.9439 | uncertain (noisy)  |
| <i>Andaluica, Spain (ISDL-06)</i>     | 36.5421 | -6.2806  | uncertain (noisy)  |
| <i>Murcia, Spain (ISDL-07)</i>        | 37.5671 | -0.9790  | instrument issues  |
| <i>Islas Belears, Spain (ISDL-29)</i> | 39.8723 | 4.3084   | instrument issues  |
| <i>Ceuta, Spain (ISDL-31)</i>         | 35.8958 | -5.3115  | instrument issues  |
| <i>Tarifa, Spain</i>                  | 36.0065 | -5.6035  | no data            |
| <i>Berkane, Morocco (ISDL-02)</i>     | 35.1119 | -2.2929  | instrument issues  |
| <i>Gibraltar, UK</i>                  | 36.1300 | -5.3500  | instrument issues  |
| <i>Algeciras, Spain</i>               | 36.1770 | -5.3980  | no data            |
| <i>Alboran Island, Spain</i>          | 35.9389 | -3.0337  | instrument issues  |
| <i>Melilla, Spain</i>                 | 35.2906 | -2.9285  | no data            |
| <i>Malaga, Spain</i>                  | 36.7118 | -4.4171  | no data            |
| <i>Motril, Spain</i>                  | 36.7202 | -3.5236  | no data            |
| <i>Almeira, Spain</i>                 | 36.8300 | -2.4784  | no data            |
| <i>Caroboneras, Spain</i>             | 36.9743 | -1.8996  | no data            |
| <i>Alicante, Spain</i>                | 38.3383 | -0.4778  | no data            |
| <i>Gandia, Spain</i>                  | 38.9952 | -0.1514  | no data            |
| <i>Valencia, Spain</i>                | 39.4420 | -0.3113  | no data            |
| <i>Sagunto, Spain</i>                 | 39.6339 | -0.2062  | no data            |
| <i>Formentera, Spain</i>              | 38.7347 | 1.4190   | no data            |
| <i>Ibiza, Spain</i>                   | 38.9112 | 1.4498   | no data            |
| <i>Palmade Mallorca, Spain</i>        | 39.5602 | 2.6375   | no data            |
| <i>Alcudia, Spain</i>                 | 39.8346 | 3.1390   | no data            |
| <i>Tarragona, Spain</i>               | 41.0790 | 1.2133   | no data            |
| <i>Barcelona, Spain</i>               | 41.3418 | 2.1657   | no data            |
| <i>Port Vendres, France</i>           | 42.5201 | 3.1073   | no data            |
| <i>Port la Nouvelle, France</i>       | 43.0092 | 3.0372   | instrument issues  |
| <i>Port Ferreol, France</i>           | 43.3592 | 6.7175   | missing data       |
| <i>Nice, France</i>                   | 43.6950 | 7.2850   | missing data       |
| <i>Imperia, Italy</i>                 | 43.8769 | 8.0188   | small, no analysis |
| <i>Genoa, Italy</i>                   | 44.4100 | 8.9250   | instrument issues  |
| <i>Marina di Campo, Italy</i>         | 42.7426 | 10.2383  | small, no analysis |
| <i>Cevitavecchia, Italy</i>           | 42.0940 | 11.7897  | small, no analysis |

|                                     |         |         |                                 |
|-------------------------------------|---------|---------|---------------------------------|
| <i>Ginostra, Italy</i>              | 38.7840 | 15.1933 | small, no analysis              |
| <i>Porto Torres, Italy</i>          | 40.8422 | 8.4039  | small, no analysis              |
| <i>Ponza, Italy</i>                 | 40.8952 | 12.9656 | uncertain (noisy)               |
| <i>Bari, Italy</i>                  | 41.1402 | 16.8660 | uncertain (noisy)               |
| <i>Isole Tremiti, Italy</i>         | 42.1189 | 15.5016 | small, no analysis              |
| <i>Ancona, Italy</i>                | 43.6248 | 13.5065 | small, no analysis              |
| <i>Ravenna, Italy</i>               | 44.4921 | 12.2827 | uncertain (noisy)               |
| <i>Venice, Italy</i>                | 45.4182 | 12.4265 | uncertain (noisy)               |
| <i>Trieste, Italy</i>               | 45.6494 | 13.7579 | uncertain (noisy)               |
| <i>Sobra, Croatia</i>               | 42.7930 | 17.6200 | uncertain (noisy)               |
| <i>Preveza, Greece (ISDL-35)</i>    | 38.9495 | 20.7287 | missing data                    |
| <i>Katakolo, Greece</i>             | 37.6400 | 21.3190 | instrument issues               |
| <i>Kalamata, Greece</i>             | 37.0220 | 22.1100 | uncertain (undersampled, 5 min) |
| <i>Panormos, Greece (ISDL-24)</i>   | 38.3600 | 22.2539 | instrument issues               |
| <i>Kalathos, Greece (NOA-01)</i>    | 36.1139 | 28.0696 | no data                         |
| <i>Bozcaada, Turkey (ISDL-14)</i>   | 39.8357 | 26.0759 | missing data                    |
| <i>Samothraki, Greece (NOA-09)</i>  | 40.4746 | 25.4680 | small, no analysis              |
| <i>Gokcaeda, Turkey</i>             | 40.2314 | 25.8936 | small, no analysis              |
| <i>Thesaloniki, Greece (NOA-12)</i> | 40.6300 | 22.9100 | no data                         |
| <i>Corinth, Greece (ISDL-13)</i>    | 37.9452 | 22.9365 | small, no analysis              |
| <i>Kasos, Greece (NOA-03)</i>       | 35.4186 | 26.9218 | instrument issues               |
| <i>Hrakleio, Crete (NOA-10)</i>     | 35.3484 | 25.1525 | instrument issues               |
| <i>Mentes, Turkey</i>               | 38.4277 | 26.7166 | small, no analysis              |
| <i>Bozyazi, Turkey</i>              | 36.0974 | 32.9413 | instrument issues               |
| <i>Zygli, Cyprus</i>                | 34.7263 | 33.3402 | missing data                    |
| <i>Erdemli, Turkey</i>              | 36.6111 | 34.3279 | uncertain (noisy)               |
| <i>Iskendrun, Turkey</i>            | 36.5942 | 36.1768 | uncertain (noisy)               |
| <i>Batroun, Lebanon</i>             | 34.2516 | 35.6564 | missing data                    |
| <i>Alexandria, Egypt</i>            | 31.2124 | 29.8849 | missing data                    |
| <i>Erdek, Turkey</i>                | 40.3899 | 27.8452 | small, no analysis              |
| <i>Yalova, Turkey</i>               | 40.6620 | 29.2777 | small, no analysis              |
| <i>Sile, Turkey</i>                 | 41.1798 | 29.6039 | uncertain (noisy)               |
| <i>Amsara, Turkey</i>               | 41.7444 | 32.3918 | uncertain (noisy)               |
| <i>Sinop, Turkey</i>                | 42.0167 | 35.1500 | uncertain (noisy)               |
| <i>Samsun, Turkey</i>               | 41.2949 | 36.3375 | missing data                    |
| <i>Trabzon, Turkey</i>              | 41.0019 | 39.7445 | small, no analysis              |

|                                       |         |         |                                  |
|---------------------------------------|---------|---------|----------------------------------|
| <i>LT Kiel, Germany</i>               | 54.4997 | 10.2747 | uncertain (noisy and stormy)     |
| <i>Warnemunde, Germany</i>            | 54.1697 | 12.1033 | uncertain (noisy and stormy)     |
| <i>Sasnitz, Germany</i>               | 54.5108 | 13.6431 | uncertain (noisy and stormy)     |
| <i>Ystad, Sweden</i>                  | 55.4228 | 13.8256 | uncertain (noisy and stormy)     |
| <i>Simrishamn, Sweden</i>             | 55.5575 | 14.3578 | uncertain (noisy and stormy)     |
| <i>Kalshamn, Sweden</i>               | 56.1542 | 14.8214 | uncertain (noisy and stormy)     |
| <i>Kungsholmsfort, Sweden</i>         | 56.1053 | 15.5894 | uncertain (noisy and stormy)     |
| <i>Kalmar, Sweden</i>                 | 56.6589 | 16.3783 | uncertain (noisy and stormy)     |
| <i>Oskarshamn, Sweden</i>             | 57.2750 | 16.4781 | uncertain (noisy and stormy)     |
| <i>Simpevarp, Sweden</i>              | 57.4103 | 16.6758 | uncertain (noisy and stormy)     |
| <i>Olands norra udde, Sweden</i>      | 57.3661 | 17.0972 | uncertain (noisy and stormy)     |
| <i>Visby, Sweden</i>                  | 57.6392 | 18.2844 | uncertain (noisy and stormy)     |
| <i>Vastervik, Sweden</i>              | 57.7483 | 16.6753 | uncertain (noisy and stormy)     |
| <i>Arko, Sweden</i>                   | 58.4842 | 16.9606 | uncertain (noisy and stormy)     |
| <i>Oxelosund Vinterklasen, Sweden</i> | 58.6617 | 17.1247 | uncertain (noisy and stormy)     |
| <i>Landsort Norra, Sweden</i>         | 58.7689 | 17.8589 | uncertain (noisy and stormy)     |
| <i>E4 Bron Sodertalje, Sweden</i>     | 59.1847 | 17.6428 | uncertain (noisy and stormy)     |
| <i>Nynas Fiskehamn, Sweden</i>        | 58.9175 | 17.9722 | uncertain (noisy and stormy)     |
| <i>Stockholm, Sweden</i>              | 59.3242 | 18.0819 | uncertain (noisy and stormy)     |
| <i>Forsmark, Sweden</i>               | 60.4086 | 18.2108 | uncertain (noisy and stormy)     |
| <i>Bonan, Sweden</i>                  | 60.7386 | 17.3186 | uncertain (noisy and stormy)     |
| <i>Ljusne Orrskarskajen, Sweden</i>   | 61.2069 | 17.1456 | uncertain (noisy and stormy)     |
| <i>Spikarna, Sweden</i>               | 62.3633 | 17.5311 | uncertain (noisy and stormy)     |
| <i>Lunde, Sweden</i>                  | 62.8806 | 17.8764 | uncertain (noisy and stormy)     |
| <i>Skagsudde, Sweden</i>              | 63.1906 | 19.0125 | uncertain (noisy and stormy)     |
| <i>Holmsund, Sweden</i>               | 63.6958 | 20.3472 | uncertain (noisy and stormy)     |
| <i>Ratan, Sweden</i>                  | 63.9861 | 20.8950 | uncertain (noisy and stormy)     |
| <i>Furuoggrund, Sweden</i>            | 64.9158 | 21.2306 | uncertain (noisy and stormy)     |
| <i>Stromoren, Sweden</i>              | 65.5497 | 22.2383 | uncertain (noisy and stormy)     |
| <i>Kalix Storon, Sweden</i>           | 65.6969 | 23.0961 | uncertain (noisy and stormy)     |
| <i>Kalix Karlsborg, Sweden</i>        | 65.7889 | 23.3033 | uncertain (noisy and stormy)     |
| <i>Lerwick, UK</i>                    | 60.1553 | -1.1452 | uncertain (undersampled, 15 min) |
| <i>Wick, UK</i>                       | 58.4400 | -3.0900 | uncertain (undersampled, 15 min) |
| <i>Aberdeen, UK</i>                   | 57.1400 | -2.0800 | uncertain (undersampled, 15 min) |
| <i>Leith, UK</i>                      | 55.9900 | -3.1800 | uncertain (undersampled, 15 min) |
| <i>North Shields, UK</i>              | 55.0100 | -1.4400 | uncertain (undersampled, 15 min) |



|                                   |         |         |                                  |
|-----------------------------------|---------|---------|----------------------------------|
| <i>Whitby, UK</i>                 | 54.4900 | -0.6100 | uncertain (undersampled, 15 min) |
| <i>Immingham, UK</i>              | 53.6300 | -0.1900 | uncertain (undersampled, 15 min) |
| <i>Cromer, UK</i>                 | 52.9300 | 1.3000  | uncertain (undersampled, 15 min) |
| <i>Lowestoft, UK</i>              | 52.4700 | 1.7500  | uncertain (undersampled, 15 min) |
| <i>Harwich, UK</i>                | 51.9500 | 1.2900  | uncertain (undersampled, 15 min) |
| <i>Sheerness, UK</i>              | 51.4500 | 0.7400  | uncertain (undersampled, 15 min) |
| <i>Herne Bay, UK</i>              | 51.3821 | 1.1152  | uncertain (noisy)                |
| <i>Deal Pier, UK</i>              | 51.2238 | 1.4093  | missing data                     |
| <i>Dover, UK</i>                  | 51.1100 | 1.3200  | uncertain (undersampled, 15 min) |
| <i>Hastings Pier, UK</i>          | 50.8509 | 0.5729  | not detected                     |
| <i>Newhaven, UK</i>               | 50.7800 | 0.0600  | uncertain (undersampled, 15 min) |
| <i>Portsmouth, UK</i>             | 50.8000 | -1.1100 | uncertain (undersampled, 15 min) |
| <i>Sandown Pier, UK</i>           | 50.6511 | -1.1532 | not detected                     |
| <i>Lymington, UK</i>              | 50.7403 | -1.5071 | not detected                     |
| <i>Bournemouth, UK</i>            | 50.7100 | -1.8700 | uncertain (undersampled, 15 min) |
| <i>Swanage Pier, UK</i>           | 50.6093 | -1.9492 | instrument issues                |
| <i>Weymouth, UK</i>               | 50.6100 | -2.4500 | uncertain (undersampled, 15 min) |
| <i>West Bay Harbour, UK</i>       | 50.7102 | -2.7640 | instrument issues                |
| <i>Exmouth Marina, UK</i>         | 50.6174 | -3.4236 | not detected                     |
| <i>Plymouth, UK</i>               | 50.3700 | -4.1900 | uncertain (undersampled, 15 min) |
| <i>Newlyn, UK</i>                 | 50.1030 | -5.5428 | uncertain (undersampled, 15 min) |
| <i>St Marys, UK</i>               | 49.9179 | -6.3172 | uncertain (undersampled, 15 min) |
| <i>Port Isaac, UK</i>             | 50.5942 | -4.8344 | not detected                     |
| <i>Ilfacombe, UK</i>              | 51.2100 | -4.1100 | uncertain (undersampled, 15 min) |
| <i>Hinkley Point, UK</i>          | 51.2100 | -3.1300 | no data                          |
| <i>Avonmouth, UK</i>              | 51.5000 | -2.7300 | uncertain (undersampled, 15 min) |
| <i>Second Severn Crossing, UK</i> | 51.5701 | -2.7000 | not detected                     |
| <i>Newport, UK</i>                | 51.5500 | -2.9900 | uncertain (undersampled, 15 min) |
| <i>Mumbles, UK</i>                | 51.5700 | -3.9800 | uncertain (undersampled, 15 min) |
| <i>Milford Haven, UK</i>          | 51.7100 | -5.0500 | uncertain (undersampled, 15 min) |
| <i>Fishguard, UK</i>              | 52.0100 | -4.9800 | uncertain (undersampled, 15 min) |
| <i>Barmouth, UK</i>               | 52.7200 | -4.0500 | uncertain (undersampled, 15 min) |
| <i>Holyhead, UK</i>               | 53.3100 | -4.6200 | uncertain (undersampled, 15 min) |
| <i>Llandundo, UK</i>              | 53.3300 | -3.8300 | uncertain (undersampled, 15 min) |
| <i>Liverpool, UK</i>              | 53.4500 | -3.0200 | uncertain (undersampled, 15 min) |
| <i>Heysham, UK</i>                | 54.0300 | -2.9200 | uncertain (undersampled, 15 min) |

|                                    |          |         |                                  |
|------------------------------------|----------|---------|----------------------------------|
| <i>Workington, UK</i>              | 54.6500  | -3.5700 | uncertain (undersampled, 15 min) |
| <i>Portpatrick, UK</i>             | 54.8400  | -5.1200 | uncertain (undersampled, 15 min) |
| <i>Bangor, UK</i>                  | 54.6600  | -5.6700 | uncertain (undersampled, 15 min) |
| <i>Portrush, UK</i>                | 55.2100  | -6.6600 | uncertain (undersampled, 15 min) |
| <i>Malin Head, Ireland</i>         | 55.3717  | -7.3343 | uncertain (noisy)                |
| <i>Millport, UK</i>                | 55.7500  | -4.9100 | uncertain (undersampled, 15 min) |
| <i>Tobermory, UK</i>               | 56.6200  | -6.0600 | uncertain (undersampled, 15 min) |
| <i>Ullapool, UK</i>                | 57.9000  | -5.1600 | uncertain (undersampled, 15 min) |
| <i>Stornoway, UK</i>               | 58.2100  | -6.3900 | uncertain (undersampled, 15 min) |
| <i>Kinlochbervie, UK</i>           | 58.4600  | -5.0500 | uncertain (undersampled, 15 min) |
| <i>Marmagao, India</i>             | 15.4100  | 73.8000 | uncertain (undersampled, 15 min) |
| <i>Minicoy, India</i>              | 8.2800   | 73.0500 | missing data                     |
| <i>Hanimadhoo, Maldives</i>        | 6.7667   | 73.1667 | missing data                     |
| <i>Male, Maldives</i>              | 4.1900   | 73.5267 | small, no analysis               |
| <i>Gan, Maldives</i>               | -0.6867  | 73.1517 | small, no analysis               |
| <i>Diego Garcia, Maldives</i>      | -7.2903  | 72.3939 | uncertain (noisy)                |
| <i>Veereval, India</i>             | 20.9000  | 70.3600 | missing data                     |
| <i>Karachi, Pakistan</i>           | 24.8117  | 66.9750 | small, no analysis               |
| <i>Ormana, Pakistan</i>            | 25.2037  | 64.6764 | no data                          |
| <i>Gwadar, Pakistan</i>            | 25.1122  | 62.3394 | missing data                     |
| <i>Khawr Wudam, Oman</i>           | 23.8200  | 57.5200 | uncertain (noisy)                |
| <i>Muscat, Oman</i>                | 23.6333  | 58.5667 | instrument issues                |
| <i>Qurayat, Oman</i>               | 23.2600  | 58.9250 | instrument issues                |
| <i>Sur, Oman</i>                   | 22.5700  | 59.5200 | missing data                     |
| <i>Duqm, Oman</i>                  | 19.6600  | 57.7200 | uncertain (noisy)                |
| <i>Zanzibar, Tanzania</i>          | -6.1500  | 39.1833 | missing data                     |
| <i>Pt La Rue, Seychelles</i>       | -4.5000  | 55.5000 | small, no analysis               |
| <i>Sainte Marie, Reunion</i>       | -20.8928 | 55.5369 | instrument issues                |
| <i>Pt Louis, Mauritius</i>         | -20.1572 | 57.5043 | small, no analysis               |
| <i>Blue Bay, Mauritius</i>         | -20.4441 | 57.7110 | small, no analysis               |
| <i>St Paul Island</i>              | -38.7117 | 77.5383 | uncertain (undersampled, 20 min) |
| <i>Marion Island, South Africa</i> | -46.8667 | 37.8667 | small, no analysis               |

213 **Table S4** Maximum water level parameters. Maximum level reached after the tsunami is given  
 214 (mm), along with the day and time of maximum water level, time between eruption and  
 215 maximum level (hours), and time difference between VMT arrival and maximum water level  
 216 (hours). A mean offset is removed from all results. Values of \*\* in the final column indicate that  
 217 the VMT arrival times were not determined.  
 218

| <u>Station</u>                           | <u>Max WL<br/>(mm)</u> | <u>Max<br/>height<br/>day</u> | <u>Max<br/>height<br/>time<br/>(UTC)</u> | <u>Time after<br/>eruption<br/>(hours)</u> | <u>Time difference<br/>between max WL and<br/>VMT arrival<br/>(hours)</u> |
|------------------------------------------|------------------------|-------------------------------|------------------------------------------|--------------------------------------------|---------------------------------------------------------------------------|
| <i>Suva, Fiji</i>                        | 346                    | 1/15/2022                     | 6:02:00                                  | 1.79                                       | 1.02                                                                      |
| <i>Lautoka, Fiji</i>                     | 173                    | 1/15/2022                     | 9:56:00                                  | 5.69                                       | 4.82                                                                      |
| <i>Quinne, New Caledonia</i>             | 1165                   | 1/15/2022                     | 9:10:00                                  | 4.92                                       | 2.95                                                                      |
| <i>Hienghene, New Caledonia</i>          | 500                    | 1/15/2022                     | 9:14:00                                  | 4.99                                       | 2.85                                                                      |
| <i>Noumea, New Caledonia</i>             | 79                     | 1/15/2022                     | 9:20:00                                  | 5.09                                       | **                                                                        |
| <i>Ouvea, New Caledonia</i>              | 528                    | 1/15/2022                     | 8:36:00                                  | 4.35                                       | **                                                                        |
| <i>Thio, New Caledonia</i>               | 710                    | 1/15/2022                     | 9:32:00                                  | 5.29                                       | 3.49                                                                      |
| <i>Fongafele, Tuvalu</i>                 | 138                    | 1/15/2022                     | 7:30:00                                  | 3.25                                       | 1.82                                                                      |
| <i>Port Vila, Vanuatu</i>                | 1132                   | 1/15/2022                     | 9:14:00                                  | 4.99                                       | 3.29                                                                      |
| <i>Luganville, Vanuatu</i>               | 585                    | 1/15/2022                     | 9:05:00                                  | 4.84                                       | 3.03                                                                      |
| <i>Litzlitz, Vanuatu</i>                 | 411                    | 1/15/2022                     | 9:05:00                                  | 4.84                                       | 3.09                                                                      |
| <i>Honiara, Solomon Islands</i>          | 113                    | 1/15/2022                     | 11:28:00                                 | 7.22                                       | 4.38                                                                      |
| <i>Tarekukure Wharf, Solomon Islands</i> | 194                    | 1/15/2022                     | 14:44:00                                 | 10.49                                      | 7.45                                                                      |
| <i>Lombrum/Manus, Papua New Guinea</i>   | 218                    | 1/15/2022                     | 13:13:00                                 | 8.97                                       | 4.67                                                                      |
| <i>Pago Pago, American Samoa</i>         | 581                    | 1/15/2022                     | 5:39:00                                  | 1.40                                       | 0.55                                                                      |
| <i>Apia, American Samoa</i>              | 270                    | 1/15/2022                     | 7:03:00                                  | 2.80                                       | 1.93                                                                      |
| <i>Tarawa, Kiribati</i>                  | 64                     | 1/15/2022                     | 11:13:00                                 | 6.97                                       | **                                                                        |
| <i>Christmas, Kiribati</i>               | 204                    | 1/15/2022                     | 10:01:00                                 | 5.77                                       | 2.63                                                                      |
| <i>Palmyra Island, USA</i>               | 41                     | 1/15/2022                     | 9:07:00                                  | 4.87                                       | 1.85                                                                      |
| <i>Penrhyn, Cook Islands</i>             | 112                    | 1/15/2022                     | 8:41:00                                  | 4.44                                       | **                                                                        |
| <i>Hilo, HI, USA</i>                     | 350                    | 1/15/2022                     | 12:41:00                                 | 8.44                                       | 3.38                                                                      |
| <i>Kawaihae, HI, USA</i>                 | 400                    | 1/15/2022                     | 11:37:00                                 | 7.37                                       | 2.62                                                                      |
| <i>Kahului, HI, USA</i>                  | 921                    | 1/15/2022                     | 12:38:00                                 | 8.39                                       | 3.27                                                                      |
| <i>Honolulu, HI, USA</i>                 | 240                    | 1/15/2022                     | 11:59:00                                 | 7.74                                       | 2.97                                                                      |
| <i>Barbers Point, HI, USA</i>            | 180                    | 1/15/2022                     | 11:11:00                                 | 6.94                                       | 1.94                                                                      |
| <i>Mokuoloe, HI, USA</i>                 | 50                     | 1/15/2022                     | 11:35:00                                 | 7.34                                       | **                                                                        |
| <i>Nawiliwili, HI, USA</i>               | 490                    | 1/15/2022                     | 12:14:00                                 | 7.99                                       | 3.40                                                                      |
| <i>French Frigate Shoals, HI, USA</i>    | 180                    | 1/15/2022                     | 13:13:00                                 | 8.97                                       | 4.12                                                                      |
| <i>Johnston Island, USA</i>              | 120                    | 1/15/2022                     | 9:46:00                                  | 5.52                                       | 1.47                                                                      |
| <i>Midway, Island, USA</i>               | 270                    | 1/15/2022                     | 11:39:00                                 | 7.40                                       | 2.43                                                                      |
| <i>Rarotonga, Cook Islands</i>           | 623                    | 1/15/2022                     | 7:48:00                                  | 3.55                                       | 1.86                                                                      |
| <i>Tubuai, Austral Islands</i>           | 351                    | 1/15/2022                     | 8:06:00                                  | 3.85                                       | 1.20                                                                      |
| <i>Huahine Island, French Polynesia</i>  | 567                    | 1/15/2022                     | 8:07:00                                  | 3.87                                       | 1.32                                                                      |

|                                          |     |           |          |       |       |
|------------------------------------------|-----|-----------|----------|-------|-------|
| <i>Papeete, Tahiti, French Polynesia</i> | 314 | 1/15/2022 | 8:15:00  | 4.00  | 1.50  |
| <i>Vairao, Tahiti, French Polynesia</i>  | 565 | 1/15/2022 | 8:18:00  | 4.05  | 1.40  |
| <i>Makemo, Tuamotu, French Polynesia</i> | 30  | 1/15/2022 | 10:04:00 | 5.82  | **    |
| <i>Rikitea, French Polynesia</i>         | 284 | 1/15/2022 | 10:35:00 | 6.34  | 2.24  |
| <i>Nuku Hiva, French Polynesia</i>       | 651 | 1/15/2022 | 10:49:00 | 6.57  | 2.43  |
| <i>Hiva Oa, French Polynesia</i>         | 380 | 1/15/2022 | 10:19:00 | 6.07  | 1.95  |
| <i>Easter Island, Chile</i>              | 489 | 1/15/2022 | 17:12:17 | 12.96 | **    |
| <i>Juan Fernandez Island, Chile</i>      | 276 | 1/16/2022 | 21:38:00 | 17.39 | 8.17  |
| <i>San Felix Island, Chile</i>           | 415 | 1/15/2022 | 22:21:00 | 18.10 | **    |
| <i>Baltra, Galapagos Islands</i>         | 323 | 1/15/2022 | 20:55:00 | 16.67 | **    |
| <i>Santa Cruz, Galapagos Islands</i>     | 797 | 1/15/2022 | 20:27:00 | 16.20 | 6.50  |
| <i>Wake Island, USA</i>                  | 150 | 1/15/2022 | 10:46:00 | 6.52  | 1.62  |
| <i>Kwajalein Island, USA</i>             | 100 | 1/15/2022 | 9:44:00  | 5.49  | 1.22  |
| <i>Chuuk, Micronesia</i>                 | 66  | 1/15/2022 | 15:19:00 | 11.07 | 6.38  |
| <i>Nauru</i>                             | 150 | 1/15/2022 | 11:32:00 | 7.29  | 4.69  |
| <i>Pohnpei, Micronesia</i>               | 45  | 1/15/2022 | 11:31:00 | 7.27  | 7.27  |
| <i>Saipan Island, USA</i>                | 81  | 1/15/2022 | 13:07:00 | 8.87  | 3.38  |
| <i>Pago Bay, Guam, USA</i>               | 110 | 1/15/2022 | 18:53:00 | 14.64 | 9.67  |
| <i>Apra Harbor, Guam, USA</i>            | 100 | 1/15/2022 | 20:01:00 | 15.77 | 10.58 |
| <i>Chichijima Island, Japan</i>          | 857 | 1/15/2022 | 13:52:00 | 9.62  | 2.78  |
| <i>Naha, Japan</i>                       | 281 | 1/15/2022 | 14:33:00 | 10.30 | 2.31  |
| <i>Ishigaki, Japan</i>                   | 210 | 1/15/2022 | 15:02:00 | 10.79 | 3.37  |
| <i>Nikol'skoe, Russia</i>                | 85  | 1/15/2022 | 19:08:00 | 14.89 | 6.87  |
| <i>Vodopadnaya, Russia</i>               | 609 | 1/15/2022 | 16:46:00 | 12.52 | 4.45  |
| <i>Preobrazheniye, Russia</i>            | 187 | 1/15/2022 | 14:25:00 | 10.17 | 1.90  |
| <i>Rudnaya Pristan, Russia</i>           | 231 | 1/15/2022 | 18:58:00 | 14.72 | 6.55  |
| <i>Abashiri, Japan</i>                   | 184 | 1/15/2022 | 17:13:00 | 12.97 | 4.55  |
| <i>Hanasaki, Japan</i>                   | 496 | 1/15/2022 | 14:29:00 | 10.24 | 2.85  |
| <i>Kushiro, Japan</i>                    | 396 | 1/15/2022 | 14:34:00 | 10.32 | 2.70  |
| <i>Hakodate, Japan</i>                   | 274 | 1/15/2022 | 16:05:00 | 11.84 | 4.42  |
| <i>Ofunato, Japan</i>                    | 243 | 1/15/2022 | 14:32:00 | 10.29 | 2.73  |
| <i>Mera, Japan</i>                       | 304 | 1/15/2022 | 15:10:00 | 10.92 | 3.35  |
| <i>Omaezaki, Japan</i>                   | 678 | 1/15/2022 | 15:16:00 | 11.02 | 3.35  |
| <i>Kushimoto, Japan</i>                  | 917 | 1/15/2022 | 16:23:00 | 12.14 | 4.52  |
| <i>Tosashimizu, Japan</i>                | 972 | 1/15/2022 | 15:23:00 | 11.14 | 3.40  |
| <i>Aburatsu, Japan</i>                   | 617 | 1/15/2022 | 16:29:00 | 12.24 | 4.90  |
| <i>Nagasaki, Japan</i>                   | 240 | 1/15/2022 | 18:11:00 | 13.94 | 5.85  |
| <i>Shek Pik, Hong Kong SAR, China</i>    | 81  | 1/15/2022 | 16:00:00 | 11.75 | 2.91  |
| <i>Quarry Bay, Hong Kong SAR, China</i>  | 73  | 1/15/2022 | 20:00:00 | 15.75 | 7.15  |
| <i>Shenzhen, China</i>                   | 121 | 1/15/2022 | 18:31:00 | 14.27 | 5.30  |
| <i>Qinglan, China</i>                    | 34  | 1/15/2022 | 21:28:00 | 17.22 | 7.93  |

|                                            |      |           |          |       |       |
|--------------------------------------------|------|-----------|----------|-------|-------|
| <i>Davao, Philippines</i>                  | 189  | 1/15/2022 | 13:14:00 | 8.99  | 2.75  |
| <i>Esperance, Australia</i>                | 184  | 1/15/2022 | 12:16:00 | 8.02  | 1.95  |
| <i>Portland, Australia</i>                 | 113  | 1/15/2022 | 16:46:00 | 12.52 | 7.88  |
| <i>Burnie, Australia</i>                   | 207  | 1/15/2022 | 14:47:00 | 10.54 | **    |
| <i>Spring Bay, Australia</i>               | 311  | 1/15/2022 | 10:06:00 | 5.85  | 2.12  |
| <i>Port Kembla, Australia</i>              | 646  | 1/15/2022 | 15:49:00 | 11.57 | 7.97  |
| <i>Twofold Bay, Australia</i>              | 708  | 1/15/2022 | 12:29:00 | 8.24  | 4.53  |
| <i>Gold Coast, Australia</i>               | 793  | 1/15/2022 | 11:56:00 | 7.69  | 4.60  |
| <i>Rossllyn Bay, Australia</i>             | 230  | 1/15/2022 | 16:34:00 | 12.32 | **    |
| <i>Norfolk Island, Australia</i>           | 1167 | 1/15/2022 | 9:18:00  | 5.05  | 3.05  |
| <i>Lihou Reef, Australia</i>               | 92   | 1/15/2022 | 11:19:00 | 7.07  | **    |
| <i>Torres Strait, Australia</i>            | 54   | 1/15/2022 | 16:00:00 | 11.75 | 7.25  |
| <i>Cape Ferguson, Australia</i>            | 60   | 1/15/2022 | 14:44:00 | 10.49 | **    |
| <i>Chatham Island, New Zealand</i>         | 784  | 1/15/2022 | 15:47:00 | 11.54 | 8.67  |
| <i>North Cape, New Zealand</i>             | 640  | 1/15/2022 | 11:24:00 | 7.15  | 4.60  |
| <i>Great Barrier Island, New Zealand</i>   | 1480 | 1/15/2022 | 12:10:00 | 7.92  | 5.72  |
| <i>Auckland, New Zealand</i>               | 202  | 1/15/2022 | 11:52:00 | 7.62  | 5.78  |
| <i>Manakau, New Zealand</i>                | 310  | 1/15/2022 | 20:18:00 | 16.05 | 13.15 |
| <i>Tauranga, New Zealand</i>               | 251  | 1/15/2022 | 10:05:00 | 5.84  | 3.39  |
| <i>East Cape, New Zealand</i>              | 637  | 1/15/2022 | 8:51:00  | 4.60  | 2.70  |
| <i>Gisborne, New Zealand</i>               | 766  | 1/15/2022 | 12:03:00 | 7.80  | 5.65  |
| <i>Napier, New Zealand</i>                 | 351  | 1/15/2022 | 10:33:00 | 6.30  | 3.40  |
| <i>Castlepoint, New Zealand</i>            | 232  | 1/15/2022 | 14:39:00 | 10.40 | 7.90  |
| <i>Wellington, New Zealand</i>             | 262  | 1/15/2022 | 22:13:00 | 17.97 | 15.40 |
| <i>Kaikoura, New Zealand</i>               | 186  | 1/15/2022 | 13:33:00 | 9.30  | 6.23  |
| <i>Christchurch, New Zealand</i>           | 434  | 1/15/2022 | 15:21:00 | 11.10 | 8.48  |
| <i>Puysegur Welcome Bay, New Zealand</i>   | 159  | 1/15/2022 | 12:32:00 | 8.29  | 5.07  |
| <i>Jackson Bay, New Zealand</i>            | 1009 | 1/15/2022 | 12:50:00 | 8.59  | 5.82  |
| <i>Dog Island, New Zealand</i>             | 250  | 1/15/2022 | 15:35:00 | 11.34 | 8.54  |
| <i>Green Island, New Zealand</i>           | 251  | 1/15/2022 | 11:39:00 | 7.40  | 4.46  |
| <i>Westgate Port Taranaki, New Zealand</i> | 496  | 1/15/2022 | 14:47:00 | 10.54 | 8.25  |
| <i>Timaru, New Zealand</i>                 | 403  | 1/15/2022 | 17:24:00 | 13.15 | 10.20 |
| <i>Moturiki, New Zealand</i>               | 807  | 1/15/2022 | 11:39:00 | 7.40  | 5.20  |
| <i>Little Kaiteriteri, New Zealand</i>     | 282  | 1/15/2022 | 20:13:00 | 15.97 | 13.57 |
| <i>Scott Base, Antarctica</i>              | 60   | 1/16/2022 | 2:36:00  | 22.35 | **    |
| <i>Base Prat, Antarctica</i>               | 266  | 1/15/2022 | 18:37:00 | 14.37 | 5.67  |
| <i>Vernadsky-Faraday, Antarctica</i>       | 283  | 1/15/2022 | 17:45:00 | 13.50 | **    |
| <i>Base O'Higgins, Antarctica</i>          | 107  | 1/15/2022 | 20:09:00 | 15.90 | 7.23  |
| <i>King Edward Point, Sandwich Islands</i> | 226  | 1/15/2022 | 21:27:00 | 17.20 | 6.91  |
| <i>Puerto Williams, Chile</i>              | 117  | 1/15/2022 | 18:46:00 | 14.52 | **    |
| <i>Ushuaia, Chile</i>                      | 78   | 1/15/2022 | 20:03:00 | 15.80 | **    |

|                                 |      |           |          |       |       |
|---------------------------------|------|-----------|----------|-------|-------|
| <i>Puerto Eden, Chile</i>       | 81   | 1/15/2022 | 18:40:00 | 14.42 | **    |
| <i>Puerto Melinka, Chile</i>    | 129  | 1/15/2022 | 19:57:00 | 15.70 | **    |
| <i>Castro, Chile</i>            | 248  | 1/15/2022 | 21:40:00 | 17.42 | 8.42  |
| <i>Ancud, Chile</i>             | 287  | 1/15/2022 | 20:06:00 | 15.85 | 7.20  |
| <i>Bahia Mansa, Chile</i>       | 581  | 1/15/2022 | 18:16:00 | 14.02 | 4.85  |
| <i>Corral, Chile</i>            | 598  | 1/15/2022 | 18:56:00 | 14.69 | 4.77  |
| <i>Lebu, Chile</i>              | 436  | 1/15/2022 | 17:39:00 | 13.40 | 4.53  |
| <i>Coronel, Chile</i>           | 309  | 1/15/2022 | 18:10:00 | 13.92 | 4.52  |
| <i>Talcahuano, Chile</i>        | 962  | 1/16/2022 | 1:08:00  | 20.89 | 11.05 |
| <i>Quiriquina, Chile</i>        | 508  | 1/15/2022 | 23:31:00 | 19.27 | 9.45  |
| <i>Constitucion, Chile</i>      | 362  | 1/15/2022 | 21:11:00 | 16.94 | 7.84  |
| <i>San Antonio, Chile</i>       | 594  | 1/15/2022 | 19:33:00 | 15.30 | 5.85  |
| <i>Valparaiso, Chile</i>        | 440  | 1/15/2022 | 19:17:00 | 15.04 | 5.60  |
| <i>Qunitero, Chile</i>          | 529  | 1/15/2022 | 18:40:00 | 14.42 | 5.13  |
| <i>Pichidangui, Chile</i>       | 723  | 1/15/2022 | 20:06:17 | 15.86 | 6.27  |
| <i>Coquimbo, Chile</i>          | 1351 | 1/15/2022 | 19:49:00 | 15.57 | 6.37  |
| <i>Huasco, Chile</i>            | 483  | 1/15/2022 | 19:51:12 | 15.61 | 6.24  |
| <i>Caldera, Chile</i>           | 584  | 1/15/2022 | 20:00:00 | 15.75 | 6.03  |
| <i>Chañaral, Chile</i>          | 1757 | 1/15/2022 | 21:25:00 | 17.17 | 7.92  |
| <i>Taltal, Chile</i>            | 481  | 1/15/2022 | 20:00:00 | 15.75 | 6.03  |
| <i>Paposo, Chile</i>            | 555  | 1/15/2022 | 19:56:00 | 15.69 | 6.20  |
| <i>Antofagasta, Chile</i>       | 385  | 1/15/2022 | 20:05:00 | 15.84 | 6.09  |
| <i>Mejillones, Chile</i>        | 740  | 1/15/2022 | 22:13:00 | 17.97 | 7.72  |
| <i>Tocopilla, Chile</i>         | 455  | 1/15/2022 | 20:23:00 | 16.14 | 6.27  |
| <i>Patache, Chile</i>           | 519  | 1/15/2022 | 21:23:00 | 17.14 | 7.38  |
| <i>Iquique, Chile</i>           | 1079 | 1/15/2022 | 22:08:00 | 17.89 | 8.17  |
| <i>Pisagua, Chile</i>           | 493  | 1/15/2022 | 23:59:00 | 19.74 | 9.92  |
| <i>Arica, Chile</i>             | 1382 | 1/15/2022 | 22:30:00 | 18.25 | 8.05  |
| <i>Matarani, Peru</i>           | 506  | 1/15/2022 | 20:48:00 | 16.55 | 6.53  |
| <i>Callao, Peru</i>             | 508  | 1/15/2022 | 21:10:00 | 16.92 | 6.13  |
| <i>La Libertad, Ecuador</i>     | 232  | 1/15/2022 | 20:48:00 | 16.55 | 7.23  |
| <i>Cocos Island, Costa Rica</i> | 299  | 1/15/2022 | 20:26:00 | 16.19 | 6.04  |
| <i>Quepos, Costa Rica</i>       | 334  | 1/15/2022 | 20:35:00 | 16.34 | 5.54  |
| <i>La Libertad, El Salvador</i> | 204  | 1/15/2022 | 22:12:00 | 17.95 | 8.26  |
| <i>Acajutla, El Salvador</i>    | 169  | 1/15/2022 | 19:43:00 | 15.47 | 5.77  |
| <i>Puerto Madero, Mexico</i>    | 389  | 1/15/2022 | 19:34:00 | 15.32 | 5.78  |
| <i>Puerto Angel, Mexico</i>     | 404  | 1/15/2022 | 20:54:00 | 16.65 | **    |
| <i>Huatulco, Mexico</i>         | 376  | 1/15/2022 | 21:11:00 | 16.94 | 8.55  |
| <i>Acapulco, Mexico</i>         | 453  | 1/15/2022 | 21:03:00 | 16.80 | 8.47  |
| <i>Lazaro Cardenas, Mexico</i>  | 188  | 1/15/2022 | 18:08:00 | 13.89 | 5.72  |
| <i>Zihuatanejo, Mexico</i>      | 512  | 1/15/2022 | 18:22:00 | 14.12 | 5.58  |

|                                      |      |           |          |       |       |
|--------------------------------------|------|-----------|----------|-------|-------|
| <i>Puerto Vallarta, Mexico</i>       | 322  | 1/15/2022 | 17:02:00 | 12.79 | 4.90  |
| <i>Mazatlan, Mexico</i>              | 289  | 1/15/2022 | 17:06:00 | 12.85 | 5.05  |
| <i>La Paz, Mexico</i>                | 142  | 1/15/2022 | 20:15:00 | 16.00 | 6.31  |
| <i>San Diego, CA, USA</i>            | 401  | 1/15/2022 | 17:40:00 | 13.42 | 5.78  |
| <i>La Jolla, CA, USA</i>             | 300  | 1/15/2022 | 18:32:00 | 14.29 | **    |
| <i>Los Angeles, CA, USA</i>          | 600  | 1/15/2022 | 18:44:00 | 14.49 | 5.32  |
| <i>Santa Monica, CA, USA</i>         | 580  | 1/15/2022 | 16:25:00 | 12.17 | 4.07  |
| <i>Santa Barbara, CA, USA</i>        | 609  | 1/15/2022 | 20:02:00 | 15.79 | 7.60  |
| <i>Oil Platform Harvest, CA, USA</i> | 110  | 1/15/2022 | 15:46:00 | 11.52 | **    |
| <i>Port San Luis, CA, USA</i>        | 1340 | 1/15/2022 | 17:14:00 | 12.99 | 5.42  |
| <i>Monterey, CA, USA</i>             | 761  | 1/15/2022 | 16:57:00 | 12.70 | 5.21  |
| <i>San Francisco, CA, USA</i>        | 310  | 1/15/2022 | 17:47:00 | 13.54 | 5.47  |
| <i>Alameda, CA, USA</i>              | 220  | 1/15/2022 | 17:24:00 | 13.15 | 4.82  |
| <i>Richmond, CA, USA</i>             | 220  | 1/15/2022 | 17:21:00 | 13.10 | 4.80  |
| <i>Redwood City, CA, USA</i>         | 70   | 1/15/2022 | 18:22:00 | 14.12 | **    |
| <i>Point Reyes, CA, USA</i>          | 811  | 1/15/2022 | 18:06:00 | 13.85 | 5.25  |
| <i>Arena Cove, CA, USA</i>           | 1320 | 1/15/2022 | 18:35:00 | 14.34 | 6.07  |
| <i>North Spit, CA, USA</i>           | 260  | 1/15/2022 | 17:11:00 | 12.94 | 4.20  |
| <i>Crescent City, CA, USA</i>        | 1149 | 1/15/2022 | 18:48:00 | 14.55 | 5.35  |
| <i>Port Orford, OR, USA</i>          | 310  | 1/15/2022 | 17:12:00 | 12.95 | 4.68  |
| <i>Charleston, OR, USA</i>           | 220  | 1/15/2022 | 21:19:00 | 17.07 | 8.83  |
| <i>South Beach, OR, USA</i>          | 190  | 1/15/2022 | 18:39:00 | 14.40 | 5.51  |
| <i>Garibaldi, OR, USA</i>            | 120  | 1/15/2022 | 20:21:00 | 16.10 | 7.96  |
| <i>Astoria, OR, USA</i>              | 100  | 1/15/2022 | 20:09:00 | 15.90 | **    |
| <i>Toke Point, WA, USA</i>           | 80   | 1/15/2022 | 18:32:00 | 14.29 | 5.10  |
| <i>Westport, WA, USA</i>             | 140  | 1/15/2022 | 17:31:00 | 13.27 | 4.10  |
| <i>La Push, WA USA</i>               | 250  | 1/15/2022 | 17:25:00 | 13.17 | 3.67  |
| <i>Neah Bay, WA, USA</i>             | 149  | 1/15/2022 | 19:35:00 | 15.34 | 6.75  |
| <i>Port Angeles, WA, USA</i>         | 140  | 1/15/2022 | 18:38:00 | 14.39 | 5.17  |
| <i>Port Townsend, WA, USA</i>        | 140  | 1/15/2022 | 21:04:00 | 16.82 | **    |
| <i>Friday Harbor, WA, USA</i>        | 50   | 1/15/2022 | 19:10:00 | 14.92 | **    |
| <i>Bamfield, BC, Canada</i>          | 158  | 1/15/2022 | 18:19:00 | 14.07 | **    |
| <i>Victoria Harbour, BC, Canada</i>  | 116  | 1/15/2022 | 19:32:00 | 15.29 | 6.94  |
| <i>Tofino, BC, Canada</i>            | 205  | 1/15/2022 | 20:32:00 | 16.29 | 7.33  |
| <i>Port Alberni, BC, Canada</i>      | 273  | 1/15/2022 | 18:16:00 | 14.02 | 5.23  |
| <i>Port Hardy, BC, Canada</i>        | 76   | 1/15/2022 | 19:07:00 | 14.87 | 14.87 |
| <i>Winter Harbour, BC, Canada</i>    | 268  | 1/15/2022 | 18:17:00 | 14.04 | 5.54  |
| <i>Henslung Cove, BC, Canada</i>     | 197  | 1/15/2022 | 17:22:00 | 13.12 | 2.87  |
| <i>Port Alexander, AK, USA</i>       | 280  | 1/15/2022 | 18:50:00 | 14.59 | 3.97  |
| <i>Sitka, AK, USA</i>                | 230  | 1/15/2022 | 17:38:00 | 13.39 | 2.75  |
| <i>Elfin Cove, AK, USA</i>           | 120  | 1/15/2022 | 17:18:00 | 13.05 | 2.67  |

|                                          |     |           |          |       |       |
|------------------------------------------|-----|-----------|----------|-------|-------|
| <i>Juneau, AK, USA</i>                   | 90  | 1/15/2022 | 19:03:00 | 14.80 | 4.73  |
| <i>Skagway, AK, USA</i>                  | 100 | 1/15/2022 | 19:15:00 | 15.00 | 4.65  |
| <i>Yakutat, AK, USA</i>                  | 390 | 1/15/2022 | 20:57:00 | 16.70 | 5.96  |
| <i>Kodiak Island, AK, USA</i>            | 282 | 1/15/2022 | 22:30:00 | 18.25 | **    |
| <i>Seward, AK, USA</i>                   | 176 | 1/15/2022 | 20:02:00 | 15.79 | 6.52  |
| <i>Altiak, AK, USA</i>                   | 100 | 1/15/2022 | 18:31:00 | 14.27 | 5.22  |
| <i>Sand Point, AK, USA</i>               | 310 | 1/15/2022 | 17:32:00 | 13.29 | 4.17  |
| <i>King Cove, AK, USA</i>                | 960 | 1/15/2022 | 16:38:00 | 12.39 | 3.25  |
| <i>Unalaska, AK, USA</i>                 | 190 | 1/15/2022 | 17:28:00 | 13.22 | 5.30  |
| <i>Nikolski, AK, USA</i>                 | 340 | 1/15/2022 | 15:22:00 | 11.12 | 3.40  |
| <i>Atka, AK, USA</i>                     | 290 | 1/15/2022 | 16:51:00 | 12.60 | 5.25  |
| <i>Adak, AK, USA</i>                     | 408 | 1/15/2022 | 15:53:00 | 11.64 | 3.25  |
| <i>St. Paul Island, AK, USA</i>          | 250 | 1/15/2022 | 17:13:00 | 12.97 | 4.33  |
| <i>Kerguelen Island, France</i>          | 60  | 1/15/2022 | 17:57:00 | 13.70 | 4.83  |
| <i>Rodrigues, Mauritius</i>              | 166 | 1/15/2022 | 18:28:00 | 14.22 | 2.72  |
| <i>Pointe Des Galets, Reunion Island</i> | 77  | 1/15/2022 | 3:47:00  | 23.54 | 12.12 |
| <i>Toamasina, Madagascar</i>             | 128 | 1/15/2022 | 23:52:00 | 19.62 | 7.58  |
| <i>Lamu, Kenya</i>                       | 43  | 1/16/2022 | 5:50:00  | 25.59 | 11.60 |
| <i>Mombasa, Kenya</i>                    | 23  | 1/15/2022 | 19:45:00 | 15.50 | 1.55  |
| <i>Dzaoudzi (Mayotte)</i>                | 34  | 1/15/2022 | 23:29:00 | 19.24 | 6.52  |
| <i>Cochin, India</i>                     | 82  | 1/16/2022 | 1:33:00  | 21.30 | 10.70 |
| <i>Majis, Oman</i>                       | 170 | 1/16/2022 | 4:14:00  | 23.99 | 10.50 |
| <i>Salalah, Oman</i>                     | 187 | 1/16/2022 | 0:11:00  | 19.94 | 5.17  |
| <i>Colombo, Sri Lanka</i>                | 105 | 1/15/2022 | 17:50:00 | 13.59 | 2.55  |
| <i>Trincomalee, Sri Lanka</i>            | 48  | 1/16/2022 | 3:50:00  | 23.59 | 13.39 |
| <i>Visakhapatnam, India</i>              | 110 | 1/16/2022 | 2:40:00  | 22.42 | 11.62 |
| <i>Dakar, Senegal</i>                    | 112 | 1/15/2022 | 20:57:00 | 16.70 | 0.86  |
| <i>Tema, Ghana</i>                       | 158 | 1/16/2022 | 1:01:00  | 20.77 | 4.58  |
| <i>Takoradi, Ghana</i>                   | 434 | 1/16/2022 | 1:07:00  | 20.87 | 3.60  |
| <i>Garachico, Spain</i>                  | 158 | 1/16/2022 | 1:42:00  | 21.45 | 5.21  |
| <i>Palmeira, Cabo Verde Islands</i>      | 188 | 1/16/2022 | 3:32:00  | 23.29 | 7.90  |
| <i>Ponta Delgada, Azores Islands</i>     | 547 | 1/16/2022 | 7:41:00  | 27.44 | 9.62  |
| <i>Concarneau, France</i>                | 167 | 1/16/2022 | 3:02:00  | 22.79 | 6.45  |
| <i>Cascais, Portugal (IPMA-IGCAS)</i>    | 120 | 1/16/2022 | 1:40:00  | 21.42 | 4.80  |
| <i>Cadiz, Spain</i>                      | 95  | 1/16/2022 | 2:49:00  | 22.57 | 6.85  |
| <i>Saidia Marina, Morocco</i>            | 112 | 1/16/2022 | 1:16:00  | 21.02 | 4.63  |
| <i>Sete, France</i>                      | 54  | 1/15/2022 | 23:11:00 | 18.94 | 1.02  |
| <i>Fos-Sur-Mer, France</i>               | 66  | 1/15/2022 | 22:23:00 | 18.14 | 1.74  |
| <i>Toulon, France</i>                    | 72  | 1/15/2022 | 23:35:00 | 19.34 | 4.09  |
| <i>La Figueirette, France</i>            | 27  | 1/15/2022 | 23:31:00 | 19.27 | 2.58  |
| <i>Fontvieille Harbour, Monaco</i>       | 82  | 1/16/2022 | 1:09:00  | 20.90 | 5.05  |



|                                      |     |           |          |       |       |
|--------------------------------------|-----|-----------|----------|-------|-------|
| <i>Centuri, Corsica</i>              | 52  | 1/16/2022 | 0:27:00  | 20.20 | 3.91  |
| <i>Ajaccio, Corsica</i>              | 40  | 1/16/2022 | 9:19:00  | 29.07 | 12.78 |
| <i>Solenzara, Corsica</i>            | 55  | 1/16/2022 | 2:18:00  | 22.05 | 4.70  |
| <i>Ile Rousse, Corsica</i>           | 45  | 1/16/2022 | 1:59:00  | 21.74 | 5.54  |
| <i>Carloforte, Sardinia</i>          | 60  | 1/16/2022 | 1:54:00  | 21.65 | 4.50  |
| <i>Cagliari, Sardinia</i>            | 152 | 1/16/2022 | 1:36:00  | 21.35 | 5.10  |
| <i>La Spezia, Italy</i>              | 37  | 1/16/2022 | 2:49:00  | 22.57 | 7.25  |
| <i>Livorno, Italy</i>                | 89  | 1/16/2022 | 0:26:00  | 20.19 | 3.44  |
| <i>Gaeta, Italy</i>                  | 51  | 1/16/2022 | 5:30:00  | 25.25 | 8.78  |
| <i>Napoli, Italy</i>                 | 66  | 1/16/2022 | 1:25:00  | 21.17 | 3.52  |
| <i>Salerno, Italy</i>                | 104 | 1/16/2022 | 1:18:00  | 21.05 | 3.68  |
| <i>Palinuro, Italy</i>               | 42  | 1/16/2022 | 0:57:00  | 20.70 | 3.63  |
| <i>Messina, Sicily</i>               | 51  | 1/16/2022 | 4:22:00  | 24.12 | 6.65  |
| <i>Palermo, Sicily</i>               | 94  | 1/15/2022 | 21:17:00 | 17.04 | 0.42  |
| <i>Sciacca, Sicily</i>               | 65  | 1/15/2022 | 23:41:00 | 19.44 | 1.40  |
| <i>Porto Empedocle, Sicily</i>       | 123 | 1/16/2022 | 0:49:00  | 20.57 | 2.80  |
| <i>Catania, Sicily</i>               | 150 | 1/15/2022 | 6:19:00  | 20.07 | 2.65  |
| <i>Lampedusa, Italy</i>              | 75  | 1/16/2022 | 5:34:00  | 25.32 | 7.07  |
| <i>Crotone, Italy</i>                | 257 | 1/16/2022 | 6:29:00  | 26.24 | 9.59  |
| <i>Taranto, Italy</i>                | 53  | 1/16/2022 | 5:10:00  | 24.92 | 7.87  |
| <i>Otranto, Italy</i>                | 106 | 1/16/2022 | 2:02:00  | 21.79 | 4.94  |
| <i>Vieste, Italy</i>                 | 96  | 1/17/2022 | 10:07:00 | 53.87 | **    |
| <i>Ortona, Italy</i>                 | 112 | 1/17/2022 | 14:23:00 | 58.14 | **    |
| <i>S.Benedetto Del Tronto, Italy</i> | 107 | 1/17/2022 | 11:38:00 | 55.39 | **    |
| <i>Stari Grad, Croatia</i>           | 99  | 1/17/2022 | 12:51:00 | 56.60 | **    |
| <i>Peiraias, Greece</i>              | 31  | 1/16/2022 | 1:10:00  | 20.92 | 3.15  |
| <i>Syros, Greece</i>                 | 17  | 1/16/2022 | 1:48:00  | 21.55 | 3.51  |
| <i>Plimiri, Greece (NOA-02)</i>      | 110 | 1/16/2022 | 1:16:00  | 21.02 | 4.93  |
| <i>Ierapetra, Crete (NOA-04)</i>     | 69  | 1/16/2022 | 0:57:00  | 20.70 | 3.90  |
| <i>Itea, Greece (NOA-05)</i>         | 68  | 1/16/2022 | 2:26:00  | 22.19 | 5.29  |
| <i>Aigio, Greece (NOA-06)</i>        | 40  | 1/16/2022 | 2:17:00  | 22.04 | 4.84  |
| <i>Zakynthos, Greece (NOA-07)</i>    | 92  | 1/16/2022 | 0:57:00  | 20.70 | 3.15  |
| <i>Kerykya, Greece (NOA-11)</i>      | 99  | 1/16/2022 | 0:24:00  | 20.15 | 1.53  |
| <i>Bodrum, Turkey</i>                | 118 | 1/16/2022 | 2:35:00  | 22.34 | 5.84  |
| <i>Marmaris, Turkey</i>              | 121 | 1/15/2022 | 23:32:00 | 19.29 | 3.00  |
| <i>Antalya, Turkey</i>               | 36  | 1/16/2022 | 1:57:00  | 21.70 | 5.96  |
| <i>Tasucu, Turkey</i>                | 50  | 1/15/2022 | 23:47:00 | 19.54 | 4.14  |
| <i>Marmara Ereğlisi, Turkey</i>      | 39  | 1/16/2022 | 1:52:00  | 21.62 | **    |
| <i>Istanbul, Turkey</i>              | 74  | 1/16/2022 | 3:42:00  | 23.45 | 6.83  |
| <i>Igneada, Turkey</i>               | 95  | 1/16/2022 | 4:10:00  | 23.92 | 6.57  |
| <i>Imbituba, Brazil</i>              | 188 | 1/16/2022 | 6:43:00  | 26.47 | 16.03 |

|                                             |     |           |          |       |       |
|---------------------------------------------|-----|-----------|----------|-------|-------|
| <i>Vieux Fort, St Lucia</i>                 | 81  | 1/15/2022 | 17:09:00 | 12.90 | 0.98  |
| <i>Dennery, St Lucia</i>                    | 84  | 1/16/2022 | 6:50:00  | 26.59 | 14.32 |
| <i>Calliaqua, St Vincent and Grenadines</i> | 48  | 1/15/2022 | 17:12:00 | 12.95 | 1.20  |
| <i>Fort-de-France, Martinique</i>           | 112 | 1/15/2022 | 17:36:00 | 13.35 | 1.53  |
| <i>Deshaies, Guadeloupe</i>                 | 69  | 1/15/2022 | 17:51:00 | 13.60 | 1.50  |
| <i>Portsmouth, Dominica</i>                 | 67  | 1/15/2022 | 16:23:00 | 12.14 | 0.54  |
| <i>Blowing Point, Anguilla</i>              | 164 | 1/16/2022 | 5:52:00  | 25.62 | 13.47 |
| <i>Baharona, Dominican Republic</i>         | 44  | 1/15/2022 | 17:04:00 | 12.82 | 1.78  |
| <i>Puerto Plata, Dominican Republic</i>     | 17  | 1/16/2022 | 5:36:00  | 25.35 | 14.03 |
| <i>Punta Cana, Dominican Republic</i>       | 186 | 1/16/2022 | 6:13:00  | 25.97 | 14.50 |
| <i>Charlotte Amelie, US Virgin Islands</i>  | 85  | 1/15/2022 | 17:09:00 | 12.90 | 1.06  |
| <i>Lime Tree Bay, US Virgin Islands</i>     | 43  | 1/15/2022 | 16:41:00 | 12.44 | 0.79  |
| <i>Mayaguez, Puerto Rico</i>                | 91  | 1/16/2022 | 8:01:00  | 27.77 | 16.37 |
| <i>Vieques, Puerto Rico</i>                 | 57  | 1/15/2022 | 16:00:00 | 11.75 | 0.06  |
| <i>Salinas, Puerto Rico</i>                 | 35  | 1/15/2022 | 18:42:00 | 14.45 | 2.70  |
| <i>Mona Island, Puerto Rico</i>             | 177 | 1/16/2022 | 6:15:00  | 26.00 | 14.78 |
| <i>Tuxpan, Mexico</i>                       | 69  | 1/15/2022 | 20:44:00 | 16.49 | 7.79  |
| <i>Bermuda Biological Station</i>           | 91  | 1/16/2022 | 6:41:00  | 26.44 | **    |
| <i>St Johns, Canada</i>                     | 285 | 1/16/2022 | 11:58:00 | 31.72 | 17.68 |
| <i>Port Fourchon, LA, USA</i>               | 30  | 1/15/2022 | 21:27:00 | 17.20 | 6.73  |
| <i>Grand Isle, LA, USA</i>                  | 40  | 1/15/2022 | 23:58:00 | 19.72 | 8.95  |
| <i>Wrightsville Beach, NC, USA</i>          | 110 | 1/16/2022 | 10:03:00 | 29.80 | **    |
| <i>Beaufort, NC, USA</i>                    | 70  | 1/16/2022 | 7:01:00  | 26.77 | **    |
| <i>Ocean City Inlet, MD, USA</i>            | 50  | 1/16/2022 | 6:40:00  | 26.42 | **    |
| <i>Lewes, DE, USA</i>                       | 80  | 1/16/2022 | 12:58:00 | 32.72 | **    |
| <i>Cape May, NJ, USA</i>                    | 51  | 1/16/2022 | 13:14:00 | 32.99 | **    |
| <i>Atlantic City, NJ, USA</i>               | 140 | 1/16/2022 | 15:43:00 | 35.47 | **    |
| <i>Woods Hole, MA, USA</i>                  | 70  | 1/16/2022 | 14:48:00 | 34.55 | **    |
| <i>Nantucket, MA, USA</i>                   | 50  | 1/16/2022 | 13:04:00 | 32.82 | **    |
| <i>Buoy #21420</i>                          | 32  | 1/15/2022 | 14:49:00 | 10.57 | 3.60  |
| <i>Buoy #51407</i>                          | 52  | 1/15/2022 | 11:11:00 | 6.94  | 2.39  |

219  
220

221 **Table S5** First arrival of the volcanic meteotsunami wave estimated from water level records.  
 222 Arrival day and times, duration since eruption (hours), and residual water level of the VMT  
 223 (mm) are given. Entries of “\*\*” indicate that the first VMT wave could not be determined from  
 224 water level records. A mean offset is removed from all results.  
 225

| <u>Station</u>                           | <u>Arrival Day</u> | <u>Arrival Time (UTC)</u> | <u>Duration (hours)</u> | <u>VMT magnitude (mm)</u> |
|------------------------------------------|--------------------|---------------------------|-------------------------|---------------------------|
| <i>Suva, Fiji</i>                        | 1/15/2022          | 5:01:00                   | 0.77                    | 31                        |
| <i>Lautoka, Fiji</i>                     | 1/15/2022          | 5:07:00                   | 0.87                    | 13                        |
| <i>Ouinne, New Caledonia</i>             | 1/15/2022          | 6:13:00                   | 1.97                    | 42                        |
| <i>Hienghene, New Caledonia</i>          | 1/15/2022          | 6:23:00                   | 2.14                    | 45                        |
| <i>Noumea, New Caledonia</i>             | **                 | **                        | **                      | **                        |
| <i>Ouvea, New Caledonia</i>              | **                 | **                        | **                      | **                        |
| <i>Thio, New Caledonia</i>               | 1/15/2022          | 6:03:00                   | 1.80                    | 29                        |
| <i>Fongafele, Tuvalu</i>                 | 1/15/2022          | 5:41:00                   | 1.44                    | 48                        |
| <i>Port Vila, Vanuatu</i>                | 1/15/2022          | 5:57:00                   | 1.70                    | 50                        |
| <i>Luganville, Vanuatu</i>               | 1/15/2022          | 6:03:00                   | 1.80                    | 34                        |
| <i>Litzlitz, Vanuatu</i>                 | 1/15/2022          | 6:00:00                   | 1.75                    | 53                        |
| <i>Honiara, Solomon Islands</i>          | 1/15/2022          | 7:05:00                   | 2.84                    | 29                        |
| <i>Tarekukure Wharf, Solomon Islands</i> | 1/15/2022          | 7:17:00                   | 3.04                    | 27                        |
| <i>Lombrum/Manus, Papua New Guinea</i>   | 1/15/2022          | 8:33:00                   | 4.30                    | 23                        |
| <i>Pago Pago, American Samoa</i>         | 1/15/2022          | 5:06:00                   | 0.85                    | 84                        |
| <i>Apia, American Samoa</i>              | 1/15/2022          | 5:07:00                   | 0.87                    | 129                       |
| <i>Tarawa, Kiribati</i>                  | **                 | **                        | **                      | **                        |
| <i>Christmas, Kiribati</i>               | 1/15/2022          | 7:23:00                   | 3.14                    | 54                        |
| <i>Palmyra Island, USA</i>               | 1/15/2022          | 7:16:00                   | 3.02                    | 27                        |
| <i>Penrhyn, Cook Islands</i>             | **                 | **                        | **                      | **                        |
| <i>Hilo, HI, USA</i>                     | 1/15/2022          | 9:18:00                   | 5.05                    | 110                       |
| <i>Kawaihae, HI, USA</i>                 | 1/15/2022          | 9:00:00                   | 4.75                    | 80                        |
| <i>Kahului, HI, USA</i>                  | 1/15/2022          | 9:22:00                   | 5.12                    | 100                       |
| <i>Honolulu, HI, USA</i>                 | 1/15/2022          | 9:01:00                   | 4.77                    | 60                        |
| <i>Barbers Point, HI, USA</i>            | 1/15/2022          | 9:15:00                   | 5.00                    | 130                       |
| <i>Mokuoloe, HI, USA</i>                 | **                 | **                        | **                      | **                        |
| <i>Nawiliwili, HI, USA</i>               | 1/15/2022          | 8:50:00                   | 4.59                    | 30                        |
| <i>French Frigate Shoals, HI, USA</i>    | 1/15/2022          | 9:06:00                   | 4.85                    | 40                        |
| <i>Johnston Island, USA</i>              | 1/15/2022          | 8:18:00                   | 4.05                    | 40                        |
| <i>Midway, Island, USA</i>               | 1/15/2022          | 9:13:00                   | 4.97                    | 50                        |
| <i>Rarotonga, Cook Islands</i>           | 1/15/2022          | 5:56:00                   | 1.69                    | 100                       |
| <i>Tubuai, Austral Islands</i>           | 1/15/2022          | 6:54:00                   | 2.65                    | 60                        |
| <i>Huahine Island, French Polynesia</i>  | 1/15/2022          | 6:48:00                   | 2.55                    | 55                        |
| <i>Papeete, Tahiti, French Polynesia</i> | 1/15/2022          | 6:45:00                   | 2.50                    | 216                       |

|                                          |           |          |      |     |
|------------------------------------------|-----------|----------|------|-----|
| <i>Vairao, Tahiti, French Polynesia</i>  | 1/15/2022 | 6:54:00  | 2.65 | 35  |
| <i>Makemo, Tuamotu, French Polynesia</i> | **        | **       | **   | **  |
| <i>Rikitea, French Polynesia</i>         | 1/15/2022 | 8:21:00  | 4.10 | 38  |
| <i>Nuku Hiva, French Polynesia</i>       | 1/15/2022 | 8:23:00  | 4.14 | 129 |
| <i>Hiva Oa, French Polynesia</i>         | 1/15/2022 | 8:22:00  | 4.12 | 91  |
| <i>Easter Island, Chile</i>              | **        | **       | **   | **  |
| <i>Juan Fernandez Island, Chile</i>      | 1/15/2022 | 13:28:00 | 9.22 | 40  |
| <i>San Felix Island, Chile</i>           | **        | **       | **   | **  |
| <i>Baltra, Galapagos Islands</i>         | **        | **       | **   | **  |
| <i>Santa Cruz, Galapagos Islands</i>     | 1/15/2022 | 13:57:00 | 9.70 | 53  |
| <i>Wake Island, USA</i>                  | 1/15/2022 | 9:09:00  | 4.90 | 50  |
| <i>Kwajalein Island, USA</i>             | 1/15/2022 | 8:31:00  | 4.27 | 50  |
| <i>Chuuk, Micronesia</i>                 | 1/15/2022 | 8:56:00  | 4.69 | 23  |
| <i>Nauru</i>                             | 1/15/2022 | 6:51:00  | 2.60 | 27  |
| <i>Pohnpei, Micronesia</i>               | **        | **       | **   | **  |
| <i>Saipan Island, USA</i>                | 1/15/2022 | 9:44:00  | 5.49 | 32  |
| <i>Pago Bay, Guam, USA</i>               | 1/15/2022 | 9:13:00  | 4.97 | 80  |
| <i>Apra Harbor, Guam, USA</i>            | 1/15/2022 | 9:26:00  | 5.19 | 30  |
| <i>Chichijima Island, Japan</i>          | 1/15/2022 | 11:05:00 | 6.84 | 108 |
| <i>Naha, Japan</i>                       | 1/15/2022 | 12:14:00 | 7.99 | 78  |
| <i>Ishigaki, Japan</i>                   | 1/15/2022 | 11:40:00 | 7.42 | 35  |
| <i>Nikol'skoe, Russia</i>                | 1/15/2022 | 12:16:00 | 8.02 | 19  |
| <i>Vodopadnaya, Russia</i>               | 1/15/2022 | 12:19:00 | 8.07 | 144 |
| <i>Preobrazheniye, Russia</i>            | 1/15/2022 | 12:31:00 | 8.27 | 79  |
| <i>Rudnaya Pristan, Russia</i>           | 1/15/2022 | 12:25:00 | 8.17 | 133 |
| <i>Abashiri, Japan</i>                   | 1/15/2022 | 12:40:00 | 8.42 | 73  |
| <i>Hanasaki, Japan</i>                   | 1/15/2022 | 11:38:00 | 7.39 | 205 |
| <i>Kushiro, Japan</i>                    | 1/15/2022 | 11:52:00 | 7.62 | 143 |
| <i>Hakodate, Japan</i>                   | 1/15/2022 | 11:40:00 | 7.42 | 51  |
| <i>Ofunato, Japan</i>                    | 1/15/2022 | 11:48:00 | 7.55 | 165 |
| <i>Mera, Japan</i>                       | 1/15/2022 | 11:49:00 | 7.57 | 124 |
| <i>Omaezaki, Japan</i>                   | 1/15/2022 | 11:55:00 | 7.67 | 130 |
| <i>Kushimoto, Japan</i>                  | 1/15/2022 | 11:52:00 | 7.62 | 209 |
| <i>Tosashimizu, Japan</i>                | 1/15/2022 | 11:59:00 | 7.74 | 111 |
| <i>Aburatsu, Japan</i>                   | 1/15/2022 | 11:35:00 | 7.34 | 127 |
| <i>Nagasaki, Japan</i>                   | 1/15/2022 | 12:20:00 | 8.09 | 92  |
| <i>Shek Pik, Hong Kong SAR, China</i>    | 1/15/2022 | 13:05:00 | 8.84 | 24  |
| <i>Quarry Bay, Hong Kong SAR, China</i>  | 1/15/2022 | 12:51:00 | 8.60 | 12  |
| <i>Shenzhen, China</i>                   | 1/15/2022 | 13:13:00 | 8.97 | 23  |
| <i>Qinglan, China</i>                    | 1/15/2022 | 13:32:00 | 9.29 | 21  |
| <i>Davao, Philippines</i>                | 1/15/2022 | 10:29:00 | 6.24 | 69  |

|                                            |           |          |       |     |
|--------------------------------------------|-----------|----------|-------|-----|
| <i>Esperance, Australia</i>                | 1/15/2022 | 10:53:00 | 6.07  | 89  |
| <i>Portland, Australia</i>                 | 1/15/2022 | 8:53:00  | 4.64  | 21  |
| <i>Burnie, Australia</i>                   | **        | **       | **    | **  |
| <i>Spring Bay, Australia</i>               | 1/15/2022 | 8:26:00  | 3.74  | 48  |
| <i>Port Kembla, Australia</i>              | 1/15/2022 | 7:51:00  | 3.60  | 91  |
| <i>Twofold Bay, Australia</i>              | 1/15/2022 | 7:57:00  | 3.70  | 181 |
| <i>Gold Coast, Australia</i>               | 1/15/2022 | 7:40:00  | 3.09  | 189 |
| <i>Rosslyn Bay, Australia</i>              | **        | **       | **    | **  |
| <i>Norfolk Island, Australia</i>           | 1/15/2022 | 6:15:00  | 2.00  | 102 |
| <i>Lihou Reef, Australia</i>               | **        | **       | **    | **  |
| <i>Torres Strait, Australia</i>            | 1/15/2022 | 8:45:00  | 4.50  | 6   |
| <i>Cape Ferguson, Australia</i>            | **        | **       | **    | **  |
| <i>Chatham Island, New Zealand</i>         | 1/15/2022 | 7:07:00  | 2.87  | 103 |
| <i>North Cape, New Zealand</i>             | 1/15/2022 | 6:48:00  | 2.55  | 207 |
| <i>Great Barrier Island, New Zealand</i>   | 1/15/2022 | 6:27:00  | 2.20  | 93  |
| <i>Auckland, New Zealand</i>               | 1/15/2022 | 6:05:00  | 1.84  | 19  |
| <i>Manakau, New Zealand</i>                | 1/15/2022 | 7:09:00  | 2.90  | 72  |
| <i>Tauranga, New Zealand</i>               | 1/15/2022 | 6:42:00  | 2.45  | 51  |
| <i>East Cape, New Zealand</i>              | 1/15/2022 | 6:09:00  | 1.90  | 80  |
| <i>Gisborne, New Zealand</i>               | 1/15/2022 | 6:24:00  | 2.15  | 45  |
| <i>Napier, New Zealand</i>                 | 1/15/2022 | 6:57:00  | 2.90  | 90  |
| <i>Castlepoint, New Zealand</i>            | 1/15/2022 | 6:45:00  | 2.50  | 36  |
| <i>Wellington, New Zealand</i>             | 1/15/2022 | 6:49:00  | 2.57  | 41  |
| <i>Kaikoura, New Zealand</i>               | 1/15/2022 | 7:19:00  | 3.07  | 47  |
| <i>Christchurch, New Zealand</i>           | 1/15/2022 | 6:52:00  | 2.62  | 65  |
| <i>Puysegur Welcome Bay, New Zealand</i>   | 1/15/2022 | 7:28:00  | 3.22  | 53  |
| <i>Jackson Bay, New Zealand</i>            | 1/15/2022 | 7:01:00  | 2.77  | 61  |
| <i>Dog Island, New Zealand</i>             | 1/15/2022 | 7:03:00  | 2.80  | 30  |
| <i>Green Island, New Zealand</i>           | 1/15/2022 | 7:11:00  | 2.94  | 40  |
| <i>Westgate Port Taranaki, New Zealand</i> | 1/15/2022 | 7:12:00  | 2.29  | 67  |
| <i>Timaru, New Zealand</i>                 | 1/15/2022 | 7:12:00  | 2.95  | 35  |
| <i>Moturiki, New Zealand</i>               | 1/15/2022 | 6:27:00  | 2.20  | 187 |
| <i>Little Kaiteriteri, New Zealand</i>     | 1/15/2022 | 6:39:00  | 2.40  | 16  |
| <i>Scott Base, Antarctica</i>              | **        | **       | **    | **  |
| <i>Base Prat, Antarctica</i>               | 1/15/2022 | 12:57:00 | 8.70  | 12  |
| <i>Vernadsky-Faraday, Antarctica</i>       | **        | **       | **    | **  |
| <i>Base O'Higgins, Antarctica</i>          | 1/15/2022 | 12:55:00 | 8.67  | 13  |
| <i>King Edward Point, Sandwich Islands</i> | 1/15/2022 | 14:32:00 | 10.29 | 27  |
| <i>Puerto Williams, Chile</i>              | **        | **       | **    | **  |
| <i>Ushuaia, Chile</i>                      | **        | **       | **    | **  |
| <i>Puerto Eden, Chile</i>                  | **        | **       | **    | **  |

|                                 |           |          |       |     |
|---------------------------------|-----------|----------|-------|-----|
| <i>Puerto Melinka, Chile</i>    | **        | **       | **    | **  |
| <i>Castro, Chile</i>            | 1/15/2022 | 13:15:00 | 9.00  | 25  |
| <i>Ancud, Chile</i>             | 1/15/2022 | 12:54:00 | 8.65  | 53  |
| <i>Bahia Mansa, Chile</i>       | 1/15/2022 | 13:25:00 | 9.17  | 76  |
| <i>Corral, Chile</i>            | 1/15/2022 | 14:10:00 | 9.92  | 51  |
| <i>Lebu, Chile</i>              | 1/15/2022 | 13:07:00 | 8.87  | 44  |
| <i>Coronel, Chile</i>           | 1/15/2022 | 13:39:00 | 9.40  | 102 |
| <i>Talcahuano, Chile</i>        | 1/15/2022 | 14:05:00 | 9.84  | 59  |
| <i>Quiriquina, Chile</i>        | 1/15/2022 | 14:04:00 | 9.82  | 88  |
| <i>Constitucion, Chile</i>      | 1/15/2022 | 13:21:00 | 9.10  | 66  |
| <i>San Antonio, Chile</i>       | 1/15/2022 | 13:42:00 | 9.45  | 49  |
| <i>Valparaiso, Chile</i>        | 1/15/2022 | 13:41:00 | 9.44  | 70  |
| <i>Qunitero, Chile</i>          | 1/15/2022 | 13:32:00 | 9.29  | 80  |
| <i>Pichidangui, Chile</i>       | 1/15/2022 | 13:50:00 | 9.59  | 62  |
| <i>Coquimbo, Chile</i>          | 1/15/2022 | 13:27:00 | 9.20  | 84  |
| <i>Huasco, Chile</i>            | 1/15/2022 | 13:37:00 | 9.37  | 54  |
| <i>Caldera, Chile</i>           | 1/15/2022 | 13:58:00 | 9.72  | 111 |
| <i>Chañaral, Chile</i>          | 1/15/2022 | 13:30:00 | 9.25  | 74  |
| <i>Taltal, Chile</i>            | 1/15/2022 | 13:58:00 | 9.72  | 72  |
| <i>Paposo, Chile</i>            | 1/15/2022 | 13:44:00 | 9.49  | 78  |
| <i>Antofagasta, Chile</i>       | 1/15/2022 | 14:00:00 | 9.75  | 68  |
| <i>Mejillones, Chile</i>        | 1/15/2022 | 14:30:00 | 10.25 | 153 |
| <i>Tocopilla, Chile</i>         | 1/15/2022 | 14:07:00 | 9.87  | 77  |
| <i>Patache, Chile</i>           | 1/15/2022 | 14:00:00 | 9.75  | 116 |
| <i>Iquique, Chile</i>           | 1/15/2022 | 13:58:00 | 9.72  | 93  |
| <i>Pisagua, Chile</i>           | 1/15/2022 | 14:04:00 | 9.82  | 84  |
| <i>Arica, Chile</i>             | 1/15/2022 | 14:27:00 | 10.20 | 162 |
| <i>Matarani, Peru</i>           | 1/15/2022 | 14:16:00 | 10.02 | 91  |
| <i>Callao, Peru</i>             | 1/15/2022 | 15:02:00 | 10.79 | 127 |
| <i>La Libertad, Ecuador</i>     | 1/15/2022 | 13:34:00 | 9.32  | 27  |
| <i>Cocos Island, Costa Rica</i> | 1/15/2022 | 14:24:00 | 10.15 | 59  |
| <i>Quepos, Costa Rica</i>       | 1/15/2022 | 15:03:00 | 10.80 | 68  |
| <i>La Libertad, El Salvador</i> | 1/15/2022 | 13:56:00 | 9.69  | 76  |
| <i>Acajutla, El Salvador</i>    | 1/15/2022 | 13:57:00 | 9.70  | 77  |
| <i>Puerto Madero, Mexico</i>    | 1/15/2022 | 13:47:00 | 9.54  | 121 |
| <i>Puerto Angel, Mexico</i>     | **        | **       | **    | **  |
| <i>Huatulco, Mexico</i>         | 1/15/2022 | 12:38:00 | 8.39  | 52  |
| <i>Acapulco, Mexico</i>         | 1/15/2022 | 12:35:00 | 8.34  | 61  |
| <i>Lazaro Cardenas, Mexico</i>  | 1/15/2022 | 12:25:00 | 8.17  | 47  |
| <i>Zihuatanejo, Mexico</i>      | 1/15/2022 | 12:47:00 | 8.54  | 86  |
| <i>Puerto Vallarta, Mexico</i>  | 1/15/2022 | 12:08:00 | 7.89  | 36  |

|                                      |           |          |       |     |
|--------------------------------------|-----------|----------|-------|-----|
| <i>Mazatlan, Mexico</i>              | 1/15/2022 | 12:03:00 | 7.80  | 27  |
| <i>La Paz, Mexico</i>                | 1/15/2022 | 13:56:00 | 9.69  | 38  |
| <i>San Diego, CA, USA</i>            | 1/15/2022 | 11:53:00 | 7.64  | 20  |
| <i>La Jolla, CA, USA</i>             | **        | **       | **    | **  |
| <i>Los Angeles, CA, USA</i>          | 1/15/2022 | 13:25:00 | 9.17  | 90  |
| <i>Santa Monica, CA, USA</i>         | 1/15/2022 | 12:21:00 | 8.10  | 100 |
| <i>Santa Barbara, CA, USA</i>        | 1/15/2022 | 12:26:00 | 8.19  | 50  |
| <i>Oil Platform Harvest, CA, USA</i> | **        | **       | **    | **  |
| <i>Port San Luis, CA, USA</i>        | 1/15/2022 | 11:49:00 | 7.57  | 90  |
| <i>Monterey, CA, USA</i>             | 1/15/2022 | 11:44:00 | 7.49  | 90  |
| <i>San Francisco, CA, USA</i>        | 1/15/2022 | 12:19:00 | 8.07  | 40  |
| <i>Alameda, CA, USA</i>              | 1/15/2022 | 12:35:00 | 8.34  | 20  |
| <i>Richmond, CA, USA</i>             | 1/15/2022 | 12:33:00 | 8.30  | 30  |
| <i>Redwood City, CA, USA</i>         | **        | **       | **    | **  |
| <i>Point Reyes, CA, USA</i>          | 1/15/2022 | 12:51:00 | 8.60  | 80  |
| <i>Arena Cove, CA, USA</i>           | 1/15/2022 | 12:31:00 | 8.27  | 100 |
| <i>North Spit, CA, USA</i>           | 1/15/2022 | 12:59:00 | 8.74  | 110 |
| <i>Crescent City, CA, USA</i>        | 1/15/2022 | 13:27:00 | 9.20  | 130 |
| <i>Port Orford, OR, USA</i>          | 1/15/2022 | 12:31:00 | 8.27  | 70  |
| <i>Charleston, OR, USA</i>           | 1/15/2022 | 12:29:00 | 8.24  | 60  |
| <i>South Beach, OR, USA</i>          | 1/15/2022 | 13:08:00 | 8.89  | 60  |
| <i>Garibaldi, OR, USA</i>            | 1/15/2022 | 12:23:00 | 8.14  | 90  |
| <i>Astoria, OR, USA</i>              | **        | **       | **    | **  |
| <i>Toke Point, WA, USA</i>           | 1/15/2022 | 13:26:00 | 9.19  | 30  |
| <i>Westport, WA, USA</i>             | 1/15/2022 | 13:25:00 | 9.17  | 50  |
| <i>La Push, WA USA</i>               | 1/15/2022 | 13:45:00 | 9.50  | 130 |
| <i>Neah Bay, WA, USA</i>             | 1/15/2022 | 12:50:00 | 8.59  | 40  |
| <i>Port Angeles, WA, USA</i>         | 1/15/2022 | 13:28:00 | 9.22  | 40  |
| <i>Port Townsend, WA, USA</i>        | **        | **       | **    | **  |
| <i>Friday Harbor, WA, USA</i>        | **        | **       | **    | **  |
| <i>Bamfield, BC, Canada</i>          | **        | **       | **    | **  |
| <i>Victoria Harbour, BC, Canada</i>  | 1/15/2022 | 12:36:00 | 8.35  | 33  |
| <i>Tofino, BC, Canada</i>            | 1/15/2022 | 12:50:00 | 8.95  | 52  |
| <i>Port Alberni, BC, Canada</i>      | 1/15/2022 | 13:02:00 | 8.79  | 30  |
| <i>Port Hardy, BC, Canada</i>        | **        | **       | **    | **  |
| <i>Winter Harbour, BC, Canada</i>    | 1/15/2022 | 12:45:00 | 8.50  | 27  |
| <i>Henslung Cove, BC, Canada</i>     | 1/15/2022 | 14:30:00 | 10.25 | 66  |
| <i>Port Alexander, AK, USA</i>       | 1/15/2022 | 14:52:00 | 10.62 | 70  |
| <i>Sitka, AK, USA</i>                | 1/15/2022 | 14:53:00 | 10.64 | 40  |
| <i>Elfin Cove, AK, USA</i>           | 1/15/2022 | 14:38:00 | 10.39 | 70  |
| <i>Juneau, AK, USA</i>               | 1/15/2022 | 14:19:00 | 10.07 | 20  |

|                                          |           |          |       |     |
|------------------------------------------|-----------|----------|-------|-----|
| <i>Skagway, AK, USA</i>                  | 1/15/2022 | 14:36:00 | 10.35 | 40  |
| <i>Yakutat, AK, USA</i>                  | 1/15/2022 | 14:59:00 | 10.74 | 120 |
| <i>Kodiak Island, AK, USA</i>            | **        | **       | **    | **  |
| <i>Seward, AK, USA</i>                   | 1/15/2022 | 13:31:00 | 9.27  | 30  |
| <i>Altiak, AK, USA</i>                   | 1/15/2022 | 13:18:00 | 9.05  | 30  |
| <i>Sand Point, AK, USA</i>               | 1/15/2022 | 13:22:00 | 9.12  | 30  |
| <i>King Cove, AK, USA</i>                | 1/15/2022 | 13:23:00 | 9.14  | 100 |
| <i>Unalaska, AK, USA</i>                 | 1/15/2022 | 12:10:00 | 7.92  | 30  |
| <i>Nikolski, AK, USA</i>                 | 1/15/2022 | 11:58:00 | 7.72  | 40  |
| <i>Atka, AK, USA</i>                     | 1/15/2022 | 11:36:00 | 7.35  | 20  |
| <i>Adak, AK, USA</i>                     | 1/15/2022 | 12:38:00 | 8.39  | 100 |
| <i>St. Paul Island, AK, USA</i>          | 1/15/2022 | 12:53:00 | 8.64  | 60  |
| <i>Kerguelen Island, France</i>          | 1/15/2022 | 13:07:00 | 8.87  | 15  |
| <i>Rodrigues, Mauritius</i>              | 1/15/2022 | 15:45:00 | 11.50 | 43  |
| <i>Pointe Des Galets, Reunion Island</i> | 1/15/2022 | 15:40:00 | 11.42 | 24  |
| <i>Toamasina, Madagascar</i>             | 1/15/2022 | 16:17:00 | 12.04 | 70  |
| <i>Lamu, Kenya</i>                       | 1/15/2022 | 18:14:00 | 13.99 | 22  |
| <i>Mombasa, Kenya</i>                    | 1/15/2022 | 18:12:00 | 13.95 | 10  |
| <i>Dzaoudzi (Mayotte)</i>                | 1/15/2022 | 16:58:00 | 12.72 | 10  |
| <i>Cochin, India</i>                     | 1/15/2022 | 14:51:00 | 10.60 | 26  |
| <i>Majis, Oman</i>                       | 1/15/2022 | 17:44:00 | 13.49 | 67  |
| <i>Salalah, Oman</i>                     | 1/15/2022 | 19:01:00 | 14.77 | 84  |
| <i>Colombo, Sri Lanka</i>                | 1/15/2022 | 15:17:00 | 11.04 | 52  |
| <i>Trincomalee, Sri Lanka</i>            | 1/15/2022 | 14:27:00 | 10.20 | 48  |
| <i>Visakhapatnam, India</i>              | 1/15/2022 | 15:03:00 | 10.80 | 52  |
| <i>Dakar, Senegal</i>                    | 1/15/2022 | 20:05:00 | 15.84 | 48  |
| <i>Tema, Ghana</i>                       | 1/15/2022 | 20:26:00 | 16.19 | 29  |
| <i>Takoradi, Ghana</i>                   | 1/15/2022 | 21:31:00 | 17.27 | 107 |
| <i>Garachico, Spain</i>                  | 1/15/2022 | 20:29:00 | 16.24 | 67  |
| <i>Palmeira, Cabo Verde Islands</i>      | 1/15/2022 | 19:38:00 | 15.39 | 194 |
| <i>Ponta Delgada, Azores Islands</i>     | 1/15/2022 | 22:04:00 | 17.82 | 58  |
| <i>Concarneau, France</i>                | 1/15/2022 | 20:35:00 | 16.34 | 35  |
| <i>Cascais, Portugal (IPMA-IGCAS)</i>    | 1/15/2022 | 20:52:00 | 16.62 | 82  |
| <i>Cadiz, Spain</i>                      | 1/15/2022 | 19:58:00 | 15.72 | 53  |
| <i>Saidia Marina, Morocco</i>            | 1/15/2022 | 20:38:00 | 16.39 | 42  |
| <i>Sete, France</i>                      | 1/15/2022 | 22:10:00 | 17.92 | 41  |
| <i>Fos-Sur-Mer, France</i>               | 1/15/2022 | 20:39:00 | 16.40 | 52  |
| <i>Toulon, France</i>                    | 1/15/2022 | 19:30:00 | 15.25 | 26  |
| <i>La Figueirette, France</i>            | 1/15/2022 | 20:56:00 | 16.69 | 29  |
| <i>Fontvieille Harbour, Monaco</i>       | 1/15/2022 | 20:06:00 | 15.85 | 8   |
| <i>Centuri, Corsica</i>                  | 1/15/2022 | 20:32:00 | 16.29 | 47  |



|                                      |           |          |       |     |
|--------------------------------------|-----------|----------|-------|-----|
| <i>Ajaccio, Corsica</i>              | 1/15/2022 | 20:32:00 | 16.29 | 25  |
| <i>Solenzara, Corsica</i>            | 1/15/2022 | 21:36:00 | 17.35 | 12  |
| <i>Ile Rousse, Corsica</i>           | 1/15/2022 | 20:27:00 | 16.20 | 29  |
| <i>Carloforte, Sardinia</i>          | 1/15/2022 | 21:24:00 | 17.15 | 57  |
| <i>Cagliari, Sardinia</i>            | 1/15/2022 | 20:30:00 | 16.25 | 48  |
| <i>La Spezia, Italy</i>              | 1/15/2022 | 21:30:00 | 15.32 | 10  |
| <i>Livorno, Italy</i>                | 1/15/2022 | 21:00:00 | 16.75 | 52  |
| <i>Gaeta, Italy</i>                  | 1/15/2022 | 20:43:00 | 16.47 | 14  |
| <i>Napoli, Italy</i>                 | 1/15/2022 | 21:54:00 | 17.65 | 35  |
| <i>Salerno, Italy</i>                | 1/15/2022 | 21:37:00 | 17.37 | 59  |
| <i>Palinuro, Italy</i>               | 1/15/2022 | 21:19:00 | 17.07 | 30  |
| <i>Messina, Sicily</i>               | 1/15/2022 | 21:43:00 | 17.47 | 98  |
| <i>Palermo, Sicily</i>               | 1/15/2022 | 20:52:00 | 16.62 | 60  |
| <i>Sciacca, Sicily</i>               | 1/15/2022 | 22:17:00 | 18.04 | 64  |
| <i>Porto Empedocle, Sicily</i>       | 1/15/2022 | 22:01:00 | 17.77 | 81  |
| <i>Catania, Sicily</i>               | 1/15/2022 | 21:40:00 | 17.42 | 106 |
| <i>Lampedusa, Italy</i>              | 1/15/2022 | 22:30:00 | 18.25 | 44  |
| <i>Crotone, Italy</i>                | 1/15/2022 | 20:54:00 | 16.65 | 52  |
| <i>Taranto, Italy</i>                | 1/15/2022 | 21:18:00 | 17.05 | 29  |
| <i>Otranto, Italy</i>                | 1/15/2022 | 21:06:00 | 16.85 | 27  |
| <i>Vieste, Italy</i>                 | **        | **       | **    | **  |
| <i>Ortona, Italy</i>                 | **        | **       | **    | **  |
| <i>S.Benedetto Del Tronto, Italy</i> | **        | **       | **    | **  |
| <i>Stari Grad, Croatia</i>           | **        | **       | **    | **  |
| <i>Peiraias, Greece</i>              | 1/15/2022 | 22:01:00 | 17.77 | 24  |
| <i>Syros, Greece</i>                 | 1/15/2022 | 22:17:00 | 18.04 | 10  |
| <i>Plimiri, Greece (NOA-02)</i>      | 1/15/2022 | 20:20:00 | 16.09 | 54  |
| <i>Ierapetra, Crete (NOA-04)</i>     | 1/15/2022 | 21:03:00 | 16.80 | 53  |
| <i>Itea, Greece (NOA-05)</i>         | 1/15/2022 | 21:09:00 | 16.90 | 34  |
| <i>Aigio, Greece (NOA-06)</i>        | 1/15/2022 | 21:27:00 | 17.20 | 18  |
| <i>Zakynthos, Greece (NOA-07)</i>    | 1/15/2022 | 21:48:00 | 17.55 | 33  |
| <i>Kerykya, Greece (NOA-11)</i>      | 1/15/2022 | 22:52:00 | 18.62 | 60  |
| <i>Bodrum, Turkey</i>                | 1/15/2022 | 20:45:00 | 16.50 | 32  |
| <i>Marmaris, Turkey</i>              | 1/15/2022 | 20:32:00 | 16.29 | 27  |
| <i>Antalya, Turkey</i>               | 1/15/2022 | 19:59:00 | 15.74 | 10  |
| <i>Tasucu, Turkey</i>                | 1/15/2022 | 19:39:00 | 15.40 | 20  |
| <i>Marmara Ereglisi, Turkey</i>      | **        | **       | **    | **  |
| <i>Istanbul, Turkey</i>              | 1/15/2022 | 20:52:00 | 16.62 | 39  |
| <i>Igneada, Turkey</i>               | 1/15/2022 | 21:36:00 | 17.35 | 42  |
| <i>Imbituba, Brazil</i>              | 1/15/2022 | 14:41:00 | 10.44 | 60  |
| <i>Vieux Fort, St Lucia</i>          | 1/15/2022 | 16:10:00 | 11.92 | 133 |

|                                             |           |          |       |     |
|---------------------------------------------|-----------|----------|-------|-----|
| <i>Dennery, St Lucia</i>                    | 1/15/2022 | 16:31:00 | 12.27 | 52  |
| <i>Calliaqua, St Vincent and Grenadines</i> | 1/15/2022 | 16:00:00 | 11.75 | 25  |
| <i>Fort-de-France, Martinique</i>           | 1/15/2022 | 16:04:00 | 11.82 | 33  |
| <i>Deshaiies, Guadeloupe</i>                | 1/15/2022 | 16:21:00 | 12.10 | 47  |
| <i>Portsmouth, Dominica</i>                 | 1/15/2022 | 15:51:00 | 11.60 | 25  |
| <i>Blowing Point, Anguilla</i>              | 1/15/2022 | 16:24:00 | 12.15 | 79  |
| <i>Baharona, Dominican Republic</i>         | 1/15/2022 | 15:17:00 | 11.04 | 35  |
| <i>Puerto Plata, Dominican Republic</i>     | 1/15/2022 | 15:34:00 | 11.32 | 45  |
| <i>Punta Cana, Dominican Republic</i>       | 1/15/2022 | 15:43:00 | 11.47 | 79  |
| <i>Charlotte Amelie, US Virgin Islands</i>  | 1/15/2022 | 16:05:00 | 11.84 | 91  |
| <i>Lime Tree Bay, US Virgin Islands</i>     | 1/15/2022 | 15:54:00 | 11.65 | 36  |
| <i>Mayaguez, Puerto Rico</i>                | 1/15/2022 | 15:39:00 | 11.40 | 72  |
| <i>Vieques, Puerto Rico</i>                 | 1/15/2022 | 15:56:00 | 11.69 | 54  |
| <i>Salinas, Puerto Rico</i>                 | 1/15/2022 | 16:00:00 | 11.75 | 29  |
| <i>Mona Island, Puerto Rico</i>             | 1/15/2022 | 15:28:00 | 11.22 | 36  |
| <i>Tuxpan, Mexico</i>                       | 1/15/2022 | 13:45:00 | 8.70  | 12  |
| <i>Bermuda Biological Station</i>           | **        | **       | **    | **  |
| <i>St Johns, Canada</i>                     | 1/15/2022 | 18:17:00 | 14.04 | 191 |
| <i>Port Fourchon, LA, USA</i>               | 1/15/2022 | 14:43:00 | 10.47 | 50  |
| <i>Grand Isle, LA, USA</i>                  | 1/15/2022 | 15:08:00 | 10.77 | 30  |
| <i>Wrightsville Beach, NC, USA</i>          | **        | **       | **    | **  |
| <i>Beaufort, NC, USA</i>                    | **        | **       | **    | **  |
| <i>Ocean City Inlet, MD, USA</i>            | **        | **       | **    | **  |
| <i>Lewes, DE, USA</i>                       | **        | **       | **    | **  |
| <i>Cape May, NJ, USA</i>                    | **        | **       | **    | **  |
| <i>Atlantic City, NJ, USA</i>               | **        | **       | **    | **  |
| <i>Woods Hole, MA, USA</i>                  | **        | **       | **    | **  |
| <i>Nantucket, MA, USA</i>                   | **        | **       | **    | **  |
| <i>Buoy #21420</i>                          | 1/15/2022 | 11:13:00 | 6.97  | 30  |
| <i>Buoy #51407</i>                          | 1/15/2022 | 8:48:00  | 4.55  | 30  |

226  
227

228 **Table S6** Minimum water level parameters. The minimum level reached after the tsunami is  
 229 given (mm), along with the day and time of minimum water level, time between eruption and  
 230 minimum level (hours), and time difference between VMT arrival and minimum water level  
 231 (hours). A mean offset is removed from all results. Values of \*\* in the final column indicate that  
 232 the VMT arrival times were not determined.

233  
 234

| <u>Station</u>                           | <u>Min WL<br/>(mm)</u> | <u>Min<br/>height<br/>day</u> | <u>Min<br/>height<br/>time<br/>(UTC)</u> | <u>Time<br/>after<br/>eruption<br/>(hours)</u> | <u>Time difference<br/>between min WL and<br/>VMT arrival<br/>(hours)</u> |
|------------------------------------------|------------------------|-------------------------------|------------------------------------------|------------------------------------------------|---------------------------------------------------------------------------|
| <i>Suva, Fiji</i>                        | -221                   | 1/15/2022                     | 6:33:00                                  | 2.30                                           | 1.53                                                                      |
| <i>Lautoka, Fiji</i>                     | -197                   | 1/15/2022                     | 10:13:00                                 | 5.97                                           | 5.10                                                                      |
| <i>Ouinne, New Caledonia</i>             | -1449                  | 1/15/2022                     | 8:26:00                                  | 4.19                                           | 2.22                                                                      |
| <i>Hienghene, New Caledonia</i>          | -415                   | 1/15/2022                     | 10:11:00                                 | 5.94                                           | 3.80                                                                      |
| <i>Noumea, New Caledonia</i>             | -61                    | 1/15/2022                     | 9:03:00                                  | 4.80                                           | **                                                                        |
| <i>Ouvea, New Caledonia</i>              | -358                   | 1/15/2022                     | 8:59:00                                  | 4.74                                           | **                                                                        |
| <i>Thio, New Caledonia</i>               | -628                   | 1/15/2022                     | 9:22:00                                  | 5.12                                           | 3.32                                                                      |
| <i>Fongafele, Tuvalu</i>                 | -96                    | 1/15/2022                     | 7:35:00                                  | 3.34                                           | 1.90                                                                      |
| <i>Port Vila, Vanuatu</i>                | -732                   | 1/15/2022                     | 9:02:00                                  | 4.79                                           | 3.09                                                                      |
| <i>Luganville, Vanuatu</i>               | -498                   | 1/15/2022                     | 9:15:00                                  | 5.00                                           | 3.20                                                                      |
| <i>Litzlitz, Vanuatu</i>                 | -444                   | 1/15/2022                     | 9:00:00                                  | 4.75                                           | 3.00                                                                      |
| <i>Honiara, Solomon Islands</i>          | -121                   | 1/15/2022                     | 12:24:00                                 | 8.15                                           | 5.32                                                                      |
| <i>Tarekukure Wharf, Solomon Islands</i> | -193                   | 1/15/2022                     | 14:30:00                                 | 10.25                                          | 7.22                                                                      |
| <i>Lombrum/Manus, Papua New Guinea</i>   | -189                   | 1/15/2022                     | 13:44:00                                 | 9.49                                           | 5.18                                                                      |
| <i>Pago Pago, American Samoa</i>         | -662                   | 1/15/2022                     | 5:31:00                                  | 1.27                                           | 0.42                                                                      |
| <i>Apia, American Samoa</i>              | -302                   | 1/15/2022                     | 7:39:00                                  | 3.40                                           | 2.53                                                                      |
| <i>Tarawa, Kiribati</i>                  | -64                    | 1/15/2022                     | 9:53:00                                  | 5.64                                           | **                                                                        |
| <i>Christmas, Kiribati</i>               | -99                    | 1/15/2022                     | 9:44:00                                  | 5.49                                           | 2.35                                                                      |
| <i>Palmyra Island, USA</i>               | -41                    | 1/15/2022                     | 9:54:00                                  | 5.65                                           | 2.63                                                                      |
| <i>Penrhyn, Cook Islands</i>             | -74                    | 1/15/2022                     | 8:42:00                                  | 4.45                                           | **                                                                        |
| <i>Hilo, HI, USA</i>                     | -400                   | 1/15/2022                     | 13:12:00                                 | 8.95                                           | 3.90                                                                      |
| <i>Kawaihae, HI, USA</i>                 | -410                   | 1/15/2022                     | 11:57:00                                 | 7.70                                           | 2.95                                                                      |
| <i>Kahului, HI, USA</i>                  | -739                   | 1/15/2022                     | 12:28:00                                 | 8.22                                           | 3.10                                                                      |
| <i>Honolulu, HI, USA</i>                 | -310                   | 1/15/2022                     | 12:27:00                                 | 8.20                                           | 3.43                                                                      |
| <i>Barbers Point, HI, USA</i>            | -220                   | 1/15/2022                     | 11:41:00                                 | 7.44                                           | 2.44                                                                      |
| <i>Mokuoloe, HI, USA</i>                 | -60                    | 1/15/2022                     | 12:20:00                                 | 8.09                                           | **                                                                        |
| <i>Nawiliwili, HI, USA</i>               | -410                   | 1/15/2022                     | 12:09:00                                 | 7.90                                           | 3.32                                                                      |
| <i>French Frigate Shoals, HI, USA</i>    | -150                   | 1/15/2022                     | 13:17:00                                 | 9.04                                           | 4.19                                                                      |
| <i>Johnston Island, USA</i>              | -90                    | 1/15/2022                     | 9:24:00                                  | 5.15                                           | 1.10                                                                      |
| <i>Midway, Island, USA</i>               | -180                   | 1/15/2022                     | 11:33:00                                 | 7.30                                           | 2.33                                                                      |
| <i>Rarotonga, Cook Islands</i>           | -701                   | 1/15/2022                     | 7:38:00                                  | 3.39                                           | 1.70                                                                      |
| <i>Tubuai, Austral Islands</i>           | -187                   | 1/15/2022                     | 7:58:00                                  | 3.72                                           | 1.07                                                                      |

|                                          |      |           |          |       |       |
|------------------------------------------|------|-----------|----------|-------|-------|
| <i>Huahine Island, French Polynesia</i>  | -428 | 1/15/2022 | 8:13:00  | 3.97  | 1.42  |
| <i>Papeete, Tahiti, French Polynesia</i> | 216  | 1/15/2022 | 8:09:00  | 3.90  | 1.40  |
| <i>Vairao, Tahiti, French Polynesia</i>  | -289 | 1/15/2022 | 8:12:00  | 3.95  | 1.30  |
| <i>Makemo, Tuamotu, French Polynesia</i> | -22  | 1/15/2022 | 10:34:00 | 6.32  | **    |
| <i>Rikitea, French Polynesia</i>         | -132 | 1/15/2022 | 10:42:00 | 6.45  | 2.35  |
| <i>Nuku Hiva, French Polynesia</i>       | -683 | 1/15/2022 | 10:55:00 | 6.67  | 2.53  |
| <i>Hiva Oa, French Polynesia</i>         | -380 | 1/15/2022 | 10:10:00 | 5.92  | 1.80  |
| <i>Easter Island, Chile</i>              | -562 | 1/15/2022 | 17:14:17 | 12.99 | **    |
| <i>Juan Fernandez Island, Chile</i>      | -365 | 1/15/2022 | 21:52:00 | 17.62 | 8.40  |
| <i>San Felix Island, Chile</i>           | -295 | 1/15/2022 | 21:27:00 | 17.20 | **    |
| <i>Baltra, Galapagos Islands</i>         | -471 | 1/15/2022 | 20:48:00 | 16.55 | **    |
| <i>Santa Cruz, Galapagos Islands</i>     | -896 | 1/15/2022 | 20:19:00 | 16.07 | 6.37  |
| <i>Wake Island, USA</i>                  | -110 | 1/15/2022 | 10:41:00 | 6.44  | 1.54  |
| <i>Kwajalein Island, USA</i>             | -110 | 1/15/2022 | 9:57:00  | 5.70  | 1.43  |
| <i>Chuuk, Micronesia</i>                 | -69  | 1/15/2022 | 14:32:00 | 10.29 | 5.60  |
| <i>Nauru</i>                             | -182 | 1/15/2022 | 11:18:00 | 7.05  | 4.45  |
| <i>Pohnpei, Micronesia</i>               | -45  | 1/15/2022 | 12:05:00 | 7.84  | **    |
| <i>Saipan Island, USA</i>                | -119 | 1/15/2022 | 13:02:00 | 8.79  | 3.30  |
| <i>Pago Bay, Guam, USA</i>               | -60  | 1/15/2022 | 18:09:00 | 13.90 | 8.93  |
| <i>Apra Harbor, Guam, USA</i>            | -90  | 1/15/2022 | 19:29:00 | 15.24 | 10.05 |
| <i>Chichijima Island, Japan</i>          | -630 | 1/15/2022 | 13:45:00 | 9.50  | 2.66  |
| <i>Naha, Japan</i>                       | -191 | 1/15/2022 | 14:44:00 | 10.49 | 2.50  |
| <i>Ishigaki, Japan</i>                   | -133 | 1/15/2022 | 15:38:00 | 11.39 | 3.97  |
| <i>Nicol'skoe, Russia</i>                | -94  | 1/15/2022 | 18:44:00 | 14.49 | 6.47  |
| <i>Vodopadnaya, Russia</i>               | -649 | 1/15/2022 | 16:51:00 | 12.60 | 4.53  |
| <i>Preobrazheniye, Russia</i>            | -145 | 1/15/2022 | 13:52:00 | 9.62  | 1.35  |
| <i>Rudnaya Pristan, Russia</i>           | -205 | 1/15/2022 | 19:02:00 | 14.79 | 6.62  |
| <i>Abashiri, Japan</i>                   | -136 | 1/15/2022 | 17:03:00 | 12.80 | 4.38  |
| <i>Hanasaki, Japan</i>                   | -429 | 1/15/2022 | 15:08:00 | 10.89 | 3.50  |
| <i>Kushiro, Japan</i>                    | -441 | 1/15/2022 | 15:46:00 | 11.52 | 3.90  |
| <i>Hakodate, Japan</i>                   | -220 | 1/15/2022 | 16:21:00 | 12.10 | 4.68  |
| <i>Ofunato, Japan</i>                    | -310 | 1/15/2022 | 15:07:00 | 10.87 | 3.32  |
| <i>Mera, Japan</i>                       | -362 | 1/15/2022 | 15:20:00 | 11.09 | 3.52  |
| <i>Omaezaki, Japan</i>                   | -743 | 1/15/2022 | 15:27:00 | 11.20 | 3.53  |
| <i>Kushimoto, Japan</i>                  | -996 | 1/15/2022 | 16:30:00 | 12.25 | 4.63  |
| <i>Tosashimizu, Japan</i>                | -875 | 1/15/2022 | 15:38:00 | 11.39 | 3.65  |
| <i>Aburatsu, Japan</i>                   | -680 | 1/15/2022 | 16:43:00 | 12.47 | 5.13  |
| <i>Nagasaki, Japan</i>                   | -277 | 1/15/2022 | 19:03:00 | 14.80 | 6.71  |
| <i>Shek Pik, Hong Kong SAR, China</i>    | -109 | 1/15/2022 | 15:27:00 | 11.20 | 2.36  |
| <i>Quarry Bay, Hong Kong SAR, China</i>  | -54  | 1/15/2022 | 19:37:00 | 15.37 | 6.77  |
| <i>Shenzhen, China</i>                   | -91  | 1/15/2022 | 18:56:00 | 14.69 | 5.72  |

|                                            |       |           |          |       |       |
|--------------------------------------------|-------|-----------|----------|-------|-------|
| <i>Qinglan, China</i>                      | -35   | 1/15/2022 | 21:57:00 | 17.70 | 8.41  |
| <i>Davao, Philippines</i>                  | -247  | 1/15/2022 | 13:28:00 | 9.22  | 2.98  |
| <i>Esperance, Australia</i>                | -100  | 1/15/2022 | 12:27:00 | 8.20  | 2.13  |
| <i>Portland, Australia</i>                 | -86   | 1/15/2022 | 16:24:00 | 12.15 | 7.51  |
| <i>Burnie, Australia</i>                   | -189  | 1/15/2022 | 15:37:00 | 11.37 | **    |
| <i>Spring Bay, Australia</i>               | -371  | 1/15/2022 | 10:41:00 | 6.44  | 2.70  |
| <i>Port Kembla, Australia</i>              | -435  | 1/15/2022 | 15:33:00 | 11.30 | 7.70  |
| <i>Two Fold Bay, Australia</i>             | -613  | 1/15/2022 | 12:05:00 | 7.84  | 4.13  |
| <i>Gold Coast, Australia</i>               | -555  | 1/15/2022 | 11:30:00 | 7.25  | 4.17  |
| <i>Rossllyn Bay, Australia</i>             | -258  | 1/15/2022 | 16:19:00 | 12.07 | **    |
| <i>Norfolk Island, Australia</i>           | -1264 | 1/15/2022 | 9:01:00  | 4.77  | 2.77  |
| <i>Lihou Reef, Australia</i>               | -82   | 1/15/2022 | 11:09:00 | 6.90  | **    |
| <i>Torres Strait, Australia</i>            | -52   | 1/15/2022 | 16:36:00 | 12.35 | 7.85  |
| <i>Cape Ferguson, Australia</i>            | -56   | 1/15/2022 | 14:24:00 | 10.15 | **    |
| <i>Chatham Island, New Zealand</i>         | -534  | 1/15/2022 | 10:55:00 | 6.67  | 3.80  |
| <i>North Cape, New Zealand</i>             | -737  | 1/15/2022 | 9:18:00  | 5.05  | 2.50  |
| <i>Great Barrier Island, New Zealand</i>   | -1112 | 1/15/2022 | 9:30:00  | 5.25  | 3.05  |
| <i>Auckland, New Zealand</i>               | -199  | 1/15/2022 | 12:28:00 | 8.22  | 6.38  |
| <i>Manakau, New Zealand</i>                | -190  | 1/15/2022 | 19:22:00 | 15.12 | 12.22 |
| <i>Tauranga, New Zealand</i>               | -355  | 1/15/2022 | 9:51:00  | 5.60  | 3.15  |
| <i>East Cape, New Zealand</i>              | -650  | 1/15/2022 | 9:25:00  | 5.17  | 3.27  |
| <i>Gisborne, New Zealand</i>               | -691  | 1/15/2022 | 12:27:00 | 8.20  | 6.05  |
| <i>Napier, New Zealand</i>                 | -360  | 1/15/2022 | 10:57:00 | 6.70  | 3.80  |
| <i>Castlepoint, New Zealand</i>            | -221  | 1/15/2022 | 13:41:00 | 9.44  | 6.94  |
| <i>Wellington, New Zealand</i>             | -319  | 1/15/2022 | 22:27:00 | 18.20 | 15.63 |
| <i>Kaikoura, New Zealand</i>               | -251  | 1/15/2022 | 14:13:00 | 9.97  | 6.90  |
| <i>Christchurch, New Zealand</i>           | -432  | 1/15/2022 | 14:18:00 | 10.05 | 7.43  |
| <i>Puysegur Welcome Bay, New Zealand</i>   | -186  | 1/15/2022 | 12:48:00 | 8.55  | 5.33  |
| <i>Jackson Bay, New Zealand</i>            | -786  | 1/15/2022 | 12:34:00 | 8.32  | 5.55  |
| <i>Dog Island, New Zealand</i>             | -195  | 1/15/2022 | 16:01:00 | 11.77 | 8.97  |
| <i>Green Island, New Zealand</i>           | -281  | 1/15/2022 | 14:03:00 | 9.80  | 6.86  |
| <i>Westgate Port Taranaki, New Zealand</i> | -515  | 1/15/2022 | 14:41:00 | 10.44 | 8.15  |
| <i>Timaru, New Zealand</i>                 | -460  | 1/15/2022 | 16:56:00 | 12.69 | 9.74  |
| <i>Moturiki, New Zealand</i>               | -733  | 1/15/2022 | 11:31:00 | 7.27  | 5.07  |
| <i>Little Kaiteriteri, New Zealand</i>     | -282  | 1/15/2022 | 19:53:00 | 15.64 | 13.24 |
| <i>Scott Base, Antarctica</i>              | -70   | 1/16/2022 | 3:45:00  | 23.50 | **    |
| <i>Base Prat, Antarctica</i>               | -261  | 1/15/2022 | 18:53:00 | 14.64 | 5.94  |
| <i>Vernadsky-Faraday, Antarctica</i>       | -357  | 1/15/2022 | 17:40:00 | 13.42 | **    |
| <i>Base O'Higgins, Antarctica</i>          | -83   | 1/15/2022 | 20:25:00 | 16.17 | 7.50  |
| <i>King Edward Point, Sandwich Islands</i> | -179  | 1/15/2022 | 21:00:00 | 16.75 | 6.46  |
| <i>Puerto Williams, Chile</i>              | -86   | 1/15/2022 | 19:15:00 | 15.00 | **    |

|                                 |       |           |          |       |       |
|---------------------------------|-------|-----------|----------|-------|-------|
| <i>Ushuaia, Chile</i>           | -128  | 1/15/2022 | 21:17:00 | 17.04 | **    |
| <i>Puerto Eden, Chile</i>       | -101  | 1/15/2022 | 20:08:00 | 15.89 | **    |
| <i>Puerto Melinka, Chile</i>    | -123  | 1/15/2022 | 18:47:00 | 14.54 | **    |
| <i>Castro, Chile</i>            | -214  | 1/15/2022 | 20:41:00 | 16.44 | 7.44  |
| <i>Ancud, Chile</i>             | -269  | 1/15/2022 | 19:09:00 | 14.90 | 6.25  |
| <i>Bahia Mansa, Chile</i>       | -684  | 1/15/2022 | 18:33:00 | 14.30 | 5.13  |
| <i>Corral, Chile</i>            | -1002 | 1/15/2022 | 19:08:00 | 14.89 | 4.97  |
| <i>Lebu, Chile</i>              | -647  | 1/15/2022 | 19:39:00 | 15.40 | 6.53  |
| <i>Coronel, Chile</i>           | -268  | 1/15/2022 | 18:40:00 | 14.42 | 5.02  |
| <i>Talcahuano, Chile</i>        | -974  | 1/16/2022 | 2:05:00  | 21.84 | 12.00 |
| <i>Quiriquina, Chile</i>        | -608  | 1/16/2022 | 23:25:00 | 43.17 | 33.35 |
| <i>Constitucion, Chile</i>      | -400  | 1/15/2022 | 21:29:00 | 17.24 | 8.14  |
| <i>San Antonio, Chile</i>       | -459  | 1/15/2022 | 19:27:00 | 15.20 | 5.75  |
| <i>Valparaiso, Chile</i>        | -712  | 1/15/2022 | 19:31:00 | 15.27 | 5.83  |
| <i>Qunitero, Chile</i>          | -456  | 1/15/2022 | 18:46:00 | 14.52 | 5.23  |
| <i>Pichidangui, Chile</i>       | -682  | 1/15/2022 | 20:12:17 | 15.96 | 6.37  |
| <i>Coquimbo, Chile</i>          | -910  | 1/15/2022 | 20:18:00 | 16.05 | 6.85  |
| <i>Huasco, Chile</i>            | -334  | 1/15/2022 | 20:08:00 | 15.89 | 6.52  |
| <i>Caldera, Chile</i>           | -729  | 1/15/2022 | 20:10:00 | 15.92 | 6.20  |
| <i>Chañaral, Chile</i>          | -1908 | 1/15/2022 | 22:15:00 | 18.00 | 8.75  |
| <i>Tatal, Chile</i>             | -494  | 1/15/2022 | 20:11:00 | 15.94 | 6.22  |
| <i>Paposo, Chile</i>            | -544  | 1/15/2022 | 20:09:00 | 15.90 | 6.42  |
| <i>Antofagasta, Chile</i>       | -605  | 1/15/2022 | 20:37:00 | 16.37 | 6.62  |
| <i>Mejillones, Chile</i>        | -775  | 1/15/2022 | 22:28:00 | 18.22 | 7.97  |
| <i>Tocopilla, Chile</i>         | -538  | 1/15/2022 | 10:15:00 | 16.00 | 6.13  |
| <i>Patache, Chile</i>           | -741  | 1/15/2022 | 21:30:00 | 17.25 | 7.50  |
| <i>Iquique, Chile</i>           | -780  | 1/15/2022 | 22:01:00 | 17.77 | 8.05  |
| <i>Pisagua, Chile</i>           | -457  | 1/16/2022 | 0:37:00  | 20.37 | 10.55 |
| <i>Arica, Chile</i>             | -1058 | 1/15/2022 | 22:35:00 | 18.34 | 8.13  |
| <i>Matarani, Peru</i>           | -476  | 1/15/2022 | 20:36:00 | 16.35 | 6.33  |
| <i>Callao, Peru</i>             | -867  | 1/15/2022 | 20:52:00 | 16.62 | 5.83  |
| <i>La Libertad, Ecuador</i>     | -242  | 1/15/2022 | 21:02:00 | 16.79 | 7.47  |
| <i>Cocos Island, Costa Rica</i> | -188  | 1/15/2022 | 20:41:00 | 16.44 | 6.29  |
| <i>Quepos, Costa Rica</i>       | -303  | 1/15/2022 | 20:47:00 | 16.54 | 5.74  |
| <i>La Libertad, El Salvador</i> | -234  | 1/15/2022 | 22:48:00 | 18.55 | 8.86  |
| <i>Acajutla, El Salvador</i>    | -102  | 1/15/2022 | 19:20:00 | 15.09 | 5.39  |
| <i>Puerto Madero, Mexico</i>    | -365  | 1/15/2022 | 19:53:00 | 15.64 | 6.10  |
| <i>Puerto Angel, Mexico</i>     | -359  | 1/15/2022 | 20:52:00 | 16.62 | **    |
| <i>Huatulco, Mexico</i>         | -573  | 1/15/2022 | 21:14:00 | 16.99 | 8.60  |
| <i>Acapulco, Mexico</i>         | -496  | 1/15/2022 | 21:17:00 | 17.04 | 8.70  |
| <i>Lazaro Cardenas, Mexico</i>  | -248  | 1/15/2022 | 17:58:00 | 13.72 | 5.55  |

|                                      |       |           |          |       |      |
|--------------------------------------|-------|-----------|----------|-------|------|
| <i>Zihuatanejo, Mexico</i>           | -680  | 1/15/2022 | 18:30:00 | 14.25 | 5.71 |
| <i>Puerto Vallarta, Mexico</i>       | -347  | 1/15/2022 | 17:22:00 | 13.12 | 5.23 |
| <i>Mazatlan, Mexico</i>              | -189  | 1/15/2022 | 16:50:00 | 12.59 | 4.79 |
| <i>La Paz, Mexico</i>                | -120  | 1/15/2022 | 20:53:00 | 16.64 | 6.95 |
| <i>San Diego, CA, USA</i>            | -379  | 1/15/2022 | 17:59:00 | 13.74 | 6.10 |
| <i>La Jolla, CA, USA</i>             | -280  | 1/15/2022 | 18:07:00 | 13.87 | **   |
| <i>Los Angeles, CA, USA</i>          | -520  | 1/15/2022 | 18:14:00 | 13.99 | 4.82 |
| <i>Santa Monica, CA, USA</i>         | -610  | 1/15/2022 | 20:07:00 | 15.87 | 7.77 |
| <i>Santa Barbara, CA, USA</i>        | -771  | 1/15/2022 | 20:26:00 | 16.19 | 8.00 |
| <i>Oil Platform Harvest, CA, USA</i> | -110  | 1/15/2022 | 16:42:00 | 12.45 | **   |
| <i>Port San Luis, CA, USA</i>        | -1280 | 1/15/2022 | 17:29:00 | 13.24 | 5.67 |
| <i>Monterey, CA, USA</i>             | -709  | 1/15/2022 | 17:16:00 | 13.02 | 5.53 |
| <i>San Francisco, CA, USA</i>        | -330  | 1/15/2022 | 17:20:00 | 13.09 | 5.02 |
| <i>Alameda, CA, USA</i>              | -290  | 1/15/2022 | 17:39:00 | 13.40 | 5.07 |
| <i>Richmond, CA, USA</i>             | -220  | 1/15/2022 | 17:35:00 | 13.34 | 5.04 |
| <i>Redwood City, CA, USA</i>         | -90   | 1/15/2022 | 19:12:00 | 14.95 | **   |
| <i>Point Reyes, CA, USA</i>          | -1019 | 1/15/2022 | 17:57:00 | 13.70 | 5.10 |
| <i>Arena Cove, CA, USA</i>           | -1020 | 1/15/2022 | 17:39:00 | 13.40 | 5.13 |
| <i>North Spit, CA, USA</i>           | -250  | 1/15/2022 | 16:49:00 | 12.57 | 3.83 |
| <i>Crescent City, CA, USA</i>        | -891  | 1/15/2022 | 18:18:00 | 14.05 | 4.85 |
| <i>Port Orford, OR, USA</i>          | -380  | 1/15/2022 | 16:59:00 | 12.74 | 4.47 |
| <i>Charleston, OR, USA</i>           | -210  | 1/15/2022 | 21:35:00 | 17.34 | 9.10 |
| <i>South Beach, OR, USA</i>          | -160  | 1/15/2022 | 18:04:00 | 13.82 | 4.93 |
| <i>Garibaldi, OR, USA</i>            | -90   | 1/15/2022 | 19:51:00 | 15.60 | 7.46 |
| <i>Astoria, OR, USA</i>              | -80   | 1/15/2022 | 19:58:00 | 15.72 | **   |
| <i>Toke Point, WA, USA</i>           | -100  | 1/15/2022 | 19:01:00 | 14.77 | 5.58 |
| <i>Westport, WA, USA</i>             | -120  | 1/15/2022 | 18:16:00 | 14.02 | 4.85 |
| <i>La Push, WA USA</i>               | -200  | 1/15/2022 | 17:52:00 | 13.62 | 4.12 |
| <i>Neah Bay, WA, USA</i>             | -130  | 1/15/2022 | 19:16:00 | 15.02 | 6.43 |
| <i>Port Angeles, WA, USA</i>         | -100  | 1/15/2022 | 18:50:00 | 14.59 | 5.37 |
| <i>Port Townsend, WA, USA</i>        | -110  | 1/15/2022 | 20:27:00 | 16.20 | **   |
| <i>Friday Harbor, WA, USA</i>        | -70   | 1/15/2022 | 20:28:00 | 16.22 | **   |
| <i>Bamfield, BC, Canada</i>          | -258  | 1/15/2022 | 18:40:00 | 14.42 | **   |
| <i>Victoria Harbour, BC, Canada</i>  | -141  | 1/15/2022 | 19:58:00 | 15.72 | 7.37 |
| <i>Tofino, BC, Canada</i>            | -260  | 1/15/2022 | 20:20:00 | 16.09 | 7.13 |
| <i>Port Alberni, BC, Canada</i>      | -245  | 1/15/2022 | 19:16:00 | 15.02 | 6.23 |
| <i>Port Hardy, BC, Canada</i>        | -75   | 1/15/2022 | 19:01:00 | 14.77 | **   |
| <i>Winter Harbour, BC, Canada</i>    | -300  | 1/15/2022 | 17:44:00 | 13.49 | 4.99 |
| <i>Henslung Cove, BC, Canada</i>     | -153  | 1/15/2022 | 17:32:00 | 13.29 | 3.04 |
| <i>Port Alexander, AK, USA</i>       | -270  | 1/15/2022 | 18:39:00 | 14.40 | 3.78 |
| <i>Sitka, AK, USA</i>                | -220  | 1/15/2022 | 18:20:00 | 14.09 | 3.45 |

|                                          |      |           |          |       |       |
|------------------------------------------|------|-----------|----------|-------|-------|
| <i>Elfin Cove, AK, USA</i>               | -130 | 1/15/2022 | 18:15:00 | 14.00 | 3.62  |
| <i>Juneau, AK, USA</i>                   | -80  | 1/15/2022 | 20:08:00 | 15.89 | 5.82  |
| <i>Skagway, AK, USA</i>                  | -110 | 1/15/2022 | 20:06:00 | 15.85 | 5.50  |
| <i>Yakutat, AK, USA</i>                  | -290 | 1/15/2022 | 20:42:00 | 16.45 | 5.71  |
| <i>Kodiak Island, AK, USA</i>            | -248 | 1/15/2022 | 23:01:00 | 18.77 | **    |
| <i>Seward, AK, USA</i>                   | -94  | 1/15/2022 | 20:30:00 | 16.25 | 6.98  |
| <i>Altiak, AK, USA</i>                   | -140 | 1/15/2022 | 18:39:00 | 14.40 | 5.35  |
| <i>Sand Point, AK, USA</i>               | -340 | 1/15/2022 | 17:42:00 | 13.45 | 4.33  |
| <i>King Cove, AK, USA</i>                | -950 | 1/15/2022 | 16:32:00 | 12.29 | 3.15  |
| <i>Unalaska, AK, USA</i>                 | -180 | 1/15/2022 | 16:50:00 | 12.59 | 4.67  |
| <i>Nikolski, AK, USA</i>                 | -390 | 1/15/2022 | 15:28:00 | 11.22 | 3.50  |
| <i>Atka, AK, USA</i>                     | -300 | 1/15/2022 | 17:22:00 | 13.12 | 5.77  |
| <i>Adak, AK, USA</i>                     | -492 | 1/15/2022 | 16:12:00 | 11.95 | 3.57  |
| <i>St. Paul Island, AK, USA</i>          | -160 | 1/15/2022 | 17:06:00 | 12.85 | 4.22  |
| <i>Kerguelen Island, France</i>          | -65  | 1/15/2022 | 18:20:00 | 14.09 | 5.22  |
| <i>Rodrigues, Mauritius</i>              | -201 | 1/15/2022 | 18:18:00 | 14.05 | 2.55  |
| <i>Pointe Des Galets, Reunion Island</i> | -68  | 1/15/2022 | 19:56:00 | 15.69 | 4.27  |
| <i>Toamasina, Madagascar</i>             | -117 | 1/15/2022 | 23:21:00 | 19.10 | 7.06  |
| <i>Lamu, Kenya</i>                       | -44  | 1/16/2022 | 6:32:00  | 26.29 | 12.30 |
| <i>Mombasa, Kenya</i>                    | -23  | 1/16/2022 | 0:44:00  | 20.49 | 6.54  |
| <i>Dzaoudzi (Mayotte)</i>                | -28  | 1/15/2022 | 23:50:00 | 19.59 | 6.87  |
| <i>Cochin, India</i>                     | -70  | 1/16/2022 | 0:14:00  | 19.99 | 9.39  |
| <i>Majis, Oman</i>                       | -163 | 1/16/2022 | 4:48:00  | 24.55 | 11.06 |
| <i>Salalah, Oman</i>                     | -186 | 1/15/2022 | 23:36:00 | 19.35 | 4.58  |
| <i>Colombo, Sri Lanka</i>                | -114 | 1/15/2022 | 17:27:00 | 13.20 | 2.16  |
| <i>Trincomalee, Sri Lanka</i>            | -37  | 1/16/2022 | 3:05:00  | 22.84 | 12.64 |
| <i>Visakhapatnam, India</i>              | -100 | 1/16/2022 | 2:47:00  | 22.54 | 11.74 |
| <i>Dakar, Senegal</i>                    | -121 | 1/15/2022 | 21:09:00 | 16.90 | 1.06  |
| <i>Tema, Ghana</i>                       | -161 | 1/16/2022 | 1:32:00  | 21.29 | 5.10  |
| <i>Takoradi, Ghana</i>                   | -499 | 1/16/2022 | 1:19:00  | 21.07 | 3.80  |
| <i>Garachico, Spain</i>                  | -153 | 1/16/2022 | 1:39:00  | 21.40 | 5.16  |
| <i>Palmeira, Cabo Verde Islands</i>      | -168 | 1/16/2022 | 3:36:00  | 23.35 | 7.96  |
| <i>Ponta Delgada, Azores Islands</i>     | -619 | 1/16/2022 | 7:47:00  | 27.54 | 9.72  |
| <i>Concarneau, France</i>                | -116 | 1/16/2022 | 2:54:00  | 22.65 | 6.31  |
| <i>Cascais, Portugal (IPMA-IGCAS)</i>    | -173 | 1/16/2022 | 1:32:00  | 21.29 | 4.67  |
| <i>Cadiz, Spain</i>                      | -114 | 1/16/2022 | 3:13:00  | 22.97 | 7.25  |
| <i>Saidia Marina, Morocco</i>            | -138 | 1/16/2022 | 1:28:00  | 21.22 | 4.83  |
| <i>Sete, France</i>                      | -60  | 1/15/2022 | 22:48:00 | 18.55 | 0.63  |
| <i>Fos-Sur-Mer, France</i>               | -64  | 1/15/2022 | 23:06:00 | 18.85 | 2.45  |
| <i>Toulon, France</i>                    | -47  | 1/15/2022 | 23:51:00 | 19.60 | 4.35  |
| <i>La Figuiette, France</i>              | -28  | 1/15/2022 | 23:58:00 | 19.72 | 3.03  |



|                                      |      |           |          |       |       |
|--------------------------------------|------|-----------|----------|-------|-------|
| <i>Fontvieille Harbour, Monaco</i>   | -16  | 1/15/2022 | 23:58:00 | 19.72 | 3.87  |
| <i>Centuri, Corsica</i>              | -43  | 1/16/2022 | 0:33:00  | 20.30 | 4.01  |
| <i>Ajaccio, Corsica</i>              | -25  | 1/16/2022 | 9:38:00  | 29.39 | 13.10 |
| <i>Solenzara, Corsica</i>            | -45  | 1/16/2022 | 2:48:00  | 22.55 | 5.20  |
| <i>Ile Rousse, Corsica</i>           | -36  | 1/16/2022 | 1:45:00  | 21.50 | 5.30  |
| <i>Carloforte, Sardinia</i>          | -82  | 1/16/2022 | 2:12:00  | 21.95 | 4.80  |
| <i>Cagliari, Sardinia</i>            | -131 | 1/16/2022 | 1:20:00  | 21.09 | 4.84  |
| <i>La Spezia, Italy</i>              | -43  | 1/16/2022 | 2:17:00  | 22.04 | 6.72  |
| <i>Livorno, Italy</i>                | -72  | 1/16/2022 | 1:35:00  | 21.34 | 4.59  |
| <i>Gaeta, Italy</i>                  | -48  | 1/16/2022 | 3:32:00  | 23.29 | 6.82  |
| <i>Napoli, Italy</i>                 | -80  | 1/16/2022 | 1:00:00  | 20.75 | 3.10  |
| <i>Salerno, Italy</i>                | -117 | 1/16/2022 | 1:28:00  | 21.22 | 3.85  |
| <i>Palinuro, Italy</i>               | -46  | 1/16/2022 | 0:49:00  | 20.57 | 3.50  |
| <i>Messina, Sicily</i>               | -74  | 1/16/2022 | 4:15:00  | 24.00 | 6.53  |
| <i>Palermo, Sicily</i>               | -76  | 1/15/2022 | 21:09:00 | 16.90 | 0.28  |
| <i>Sciaccia, Sicily</i>              | -67  | 1/15/2022 | 23:19:00 | 19.07 | 1.03  |
| <i>Porto Empedocle, Sicily</i>       | -114 | 1/16/2022 | 1:18:00  | 21.05 | 3.28  |
| <i>Catania, Sicily</i>               | -163 | 1/16/2022 | 6:10:00  | 25.92 | 8.50  |
| <i>Lampedusa, Italy</i>              | -80  | 1/16/2022 | 5:49:00  | 25.57 | 7.32  |
| <i>Crotone, Italy</i>                | -235 | 1/16/2022 | 6:25:00  | 26.17 | 9.52  |
| <i>Taranto, Italy</i>                | -56  | 1/16/2022 | 6:10:00  | 25.92 | 8.87  |
| <i>Otranto, Italy</i>                | -133 | 1/16/2022 | 1:41:00  | 21.44 | 4.59  |
| <i>Vieste, Italy</i>                 | -94  | 1/17/2022 | 10:14:00 | 53.99 | **    |
| <i>Ortona, Italy</i>                 | -116 | 1/17/2022 | 14:11:00 | 57.94 | **    |
| <i>S.Benedetto Del Tronto, Italy</i> | -90  | 1/17/2022 | 10:39:00 | 54.40 | **    |
| <i>Stari Grad, Croatia</i>           | -93  | 1/17/2022 | 13:04:00 | 56.82 | **    |
| <i>Peiraias, Greece</i>              | -36  | 1/16/2022 | 1:31:00  | 21.27 | 3.50  |
| <i>Syros, Greece</i>                 | -17  | 1/16/2022 | 1:34:00  | 21.32 | 3.28  |
| <i>Plimiri, Greece (NOA-02)</i>      | -114 | 1/16/2022 | 0:54:00  | 20.65 | 4.56  |
| <i>Ierapetra, Crete (NOA-04)</i>     | -70  | 1/16/2022 | 0:17:00  | 20.04 | 3.24  |
| <i>Itea, Greece (NOA-05)</i>         | -80  | 1/16/2022 | 2:47:00  | 22.54 | 5.64  |
| <i>Aigio, Greece (NOA-06)</i>        | -41  | 1/16/2022 | 2:34:00  | 22.32 | 5.12  |
| <i>Zakynthos, Greece (NOA-07)</i>    | -75  | 1/16/2022 | 0:35:00  | 20.34 | 2.79  |
| <i>Kerykya, Greece (NOA-11)</i>      | -58  | 1/16/2022 | 0:40:00  | 20.42 | 1.80  |
| <i>Bodrum, Turkey</i>                | -89  | 1/16/2022 | 2:17:00  | 22.04 | 5.54  |
| <i>Marmaris, Turkey</i>              | -127 | 1/15/2022 | 23:51:00 | 19.60 | 3.31  |
| <i>Antalya, Turkey</i>               | -29  | 1/16/2022 | 1:35:00  | 21.34 | 5.60  |
| <i>Tasucu, Turkey</i>                | -60  | 1/15/2022 | 23:13:00 | 18.97 | 3.57  |
| <i>Marmara Ereglisi, Turkey</i>      | -46  | 1/16/2022 | 1:58:00  | 21.72 | **    |
| <i>Istanbul, Turkey</i>              | -70  | 1/16/2022 | 3:12:00  | 22.95 | 6.33  |
| <i>Igneada, Turkey</i>               | -66  | 1/16/2022 | 3:47:00  | 23.54 | 6.19  |

|                                             |      |           |          |       |       |
|---------------------------------------------|------|-----------|----------|-------|-------|
| <i>Imbituba, Brazil</i>                     | -207 | 1/16/2022 | 7:26:00  | 27.19 | 16.75 |
| <i>Vieux Fort, St Lucia</i>                 | -69  | 1/15/2022 | 17:19:00 | 13.07 | 1.15  |
| <i>Demery, St Lucia</i>                     | -52  | 1/16/2022 | 7:22:00  | 27.12 | 14.85 |
| <i>Calliaqua, St Vincent and Grenadines</i> | -58  | 1/15/2022 | 17:08:00 | 12.89 | 1.14  |
| <i>Fort-de-France, Martinique</i>           | -96  | 1/15/2022 | 17:32:00 | 13.29 | 1.47  |
| <i>Deshaies, Guadeloupe</i>                 | -75  | 1/15/2022 | 17:41:00 | 13.44 | 1.34  |
| <i>Portsmouth, Dominica</i>                 | -57  | 1/15/2022 | 16:13:00 | 11.97 | 0.37  |
| <i>Blowing Point, Anguilla</i>              | -129 | 1/16/2022 | 6:15:00  | 26.00 | 13.85 |
| <i>Baharona, Dominican Republic</i>         | -32  | 1/15/2022 | 16:48:00 | 12.55 | 1.51  |
| <i>Puerto Plata, Dominican Republic</i>     | -109 | 1/16/2022 | 5:43:00  | 25.47 | 14.15 |
| <i>Punta Cana, Dominican Republic</i>       | -148 | 1/16/2022 | 6:16:00  | 26.02 | 14.55 |
| <i>Charlotte Amelie, US Virgin Islands</i>  | -82  | 1/15/2022 | 16:53:00 | 12.64 | 0.80  |
| <i>Lime Tree Bay, US Virgin Islands</i>     | -39  | 1/15/2022 | 16:21:00 | 12.10 | 0.45  |
| <i>Mayaguez, Puerto Rico</i>                | -87  | 1/16/2022 | 8:26:00  | 28.19 | 16.79 |
| <i>Vieques, Puerto Rico</i>                 | -40  | 1/15/2022 | 23:31:00 | 19.27 | 7.58  |
| <i>Salinas, Puerto Rico</i>                 | -45  | 1/15/2022 | 18:26:00 | 14.19 | 2.44  |
| <i>Mona Island, Puerto Rico</i>             | -167 | 1/16/2022 | 6:18:00  | 26.05 | 14.83 |
| <i>Tuxpan, Mexico</i>                       | -46  | 1/15/2022 | 21:11:00 | 16.94 | 8.24  |
| <i>Bermuda Biological Station</i>           | -81  | 1/16/2022 | 6:53:00  | 26.64 | **    |
| <i>St Johns, Canada</i>                     | -366 | 1/16/2022 | 12:08:00 | 31.89 | 17.85 |
| <i>Port Fourchon, LA, USA</i>               | -40  | 1/15/2022 | 21:54:00 | 17.65 | 7.18  |
| <i>Grand Isle, LA, USA</i>                  | -30  | 1/16/2022 | 0:46:00  | 20.52 | 9.75  |
| <i>Wrightsville Beach, NC, USA</i>          | -80  | 1/16/2022 | 9:45:00  | 29.50 | **    |
| <i>Beaufort, NC, USA</i>                    | -110 | 1/16/2022 | 7:18:00  | 27.05 | **    |
| <i>Ocean City Inlet, MD, USA</i>            | -80  | 1/16/2022 | 7:05:00  | 26.84 | **    |
| <i>Lewes, DE, USA</i>                       | -100 | 1/16/2022 | 12:40:00 | 32.42 | **    |
| <i>Cape May, NJ, USA</i>                    | -80  | 1/16/2022 | 12:23:00 | 32.14 | **    |
| <i>Atlantic City, NJ, USA</i>               | -110 | 1/16/2022 | 13:20:00 | 33.09 | **    |
| <i>Woods Hole, MA, USA</i>                  | -80  | 1/16/2022 | 13:57:00 | 33.70 | **    |
| <i>Nantucket, MA, USA</i>                   | -60  | 1/16/2022 | 13:50:00 | 33.59 | **    |
| <i>Buoy #21420</i>                          | -30  | 1/15/2022 | 14:16:00 | 10.02 | 3.05  |
| <i>Buoy #51407</i>                          | -53  | 1/15/2022 | 11:15:00 | 7.00  | 2.45  |

236 **Table S7** Maximum VMT-induced WL observed at the 30 deep-water buoys considered here  
 237 (cm) and “persistence” of each buoy (time at 1-minute resolution recording; hrs). Locations  
 238 where the VMT was not registered are indicated by “\*\*”.  
 239

| <i>Deep-water Buoy #</i> | <i>Maximum VMT WL (cm)</i> | <i>“Persistence” Time (hrs)</i> |
|--------------------------|----------------------------|---------------------------------|
| <i>Buoy #55015</i>       | 5.8                        | 5                               |
| <i>Buoy #55023</i>       | **                         | 9                               |
| <i>Buoy #51425</i>       | 7.0                        | 30                              |
| <i>Buoy #52406</i>       | 3.8                        | 16                              |
| <i>Buoy #51407</i>       | 2.9                        | 18.5                            |
| <i>Buoy #52403</i>       | 3.2                        | 8                               |
| <i>Buoy #52402</i>       | 3.9                        | 5                               |
| <i>Buoy #52401</i>       | 4                          | 10                              |
| <i>Buoy #52404</i>       | **                         | 5                               |
| <i>Buoy #21420</i>       | 3                          | 8                               |
| <i>Buoy #21418</i>       | 3.8                        | 10                              |
| <i>Buoy #21419</i>       | **                         | 5                               |
| <i>Buoy #21416</i>       | 3.3                        | 10                              |
| <i>Buoy #21415</i>       | **                         | 13                              |
| <i>Buoy #46408</i>       | 2.4                        | 10                              |
| <i>Buoy #46402</i>       | **                         | 9                               |
| <i>Buoy #46403</i>       | **                         | 9                               |
| <i>Buoy #46414</i>       | **                         | 7                               |
| <i>Buoy #46409</i>       | **                         | 13                              |
| <i>Buoy #46415</i>       | **                         | 9                               |
| <i>Buoy #46416</i>       | **                         | 10                              |
| <i>Buoy #46404</i>       | **                         | 10                              |
| <i>Buoy #46407</i>       | **                         | 10                              |
| <i>Buoy #46411</i>       | **                         | 9                               |
| <i>Buoy #43412</i>       | **                         | 12                              |
| <i>Buoy #32411</i>       | **                         | 15                              |
| <i>Buoy #32413</i>       | **                         | 13                              |
| <i>Buoy #32401</i>       | **                         | 9                               |
| <i>Buoy #32403</i>       | **                         | 17                              |
| <i>Buoy #32402</i>       | **                         | 10                              |

240  
 241

242 **Table S8**  $\beta$ -factor calculations. Station names are given, along with volcanic meteotsunami-  
 243 induced maximum residual water level (mm), air pressure gauge used, maximum air pressure at  
 244 VMT arrival (mb) and arrival time, and calculated  $\beta$ . Calculations are determined by the ratio of  
 245 residual VMT water level maximum to maximum air pressure.  
 246

| <u>Station</u>                           | <u>VMT<br/>WL<br/>(mm)</u> | <u><math>P_A</math> Station used</u> | <u><math>P_A</math><br/>max<br/>(mb)</u> | <u>Day</u> | <u>Time<br/>(UTC)</u> | <u><math>\beta</math></u> | <u>Relative<br/>error<br/>(%)</u> | <u>Abs<br/>error</u> |
|------------------------------------------|----------------------------|--------------------------------------|------------------------------------------|------------|-----------------------|---------------------------|-----------------------------------|----------------------|
| <i>Suva, Fiji</i>                        | 31                         | Fiji                                 | 4.7                                      | 1/15/2022  | 5:20:00               | 0.7                       | 32.6                              | 0.2                  |
| <i>Lautoka, Fiji</i>                     | 13                         | Fiji                                 | 4.7                                      | 1/15/2022  | 5:20:00               | 0.3                       | 77.4                              | 0.2                  |
| <i>Quinne, New Caledonia</i>             | 42                         | Kerikeri                             | 4.7                                      | 1/15/2022  | 6:10:00               | 0.9                       | 24.3                              | 0.2                  |
| <i>Hienghene, New Caledonia</i>          | 45                         | Kerikeri                             | 3.2                                      | 1/15/2022  | 6:10:00               | 1.4                       | 23.2                              | 0.3                  |
| <i>Thio, New Caledonia</i>               | 29                         | Kerikeri                             | 3.2                                      | 1/15/2022  | 6:10:00               | 0.9                       | 35.0                              | 0.3                  |
| <i>Fongafele, Tuvalu</i>                 | 48                         | Kerikeri                             | 3.2                                      | 1/15/2022  | 6:10:00               | 1.5                       | 21.9                              | 0.3                  |
| <i>Port Vila, Vanuatu</i>                | 50                         | Kerikeri                             | 3.2                                      | 1/15/2022  | 6:10:00               | 1.6                       | 20.9                              | 0.3                  |
| <i>Luganville, Vanuatu</i>               | 34                         | Kerikeri                             | 3.2                                      | 1/15/2022  | 6:10:00               | 1.1                       | 30.0                              | 0.3                  |
| <i>Litzlitz, Vanuatu</i>                 | 53                         | Kerikeri                             | 3.2                                      | 1/15/2022  | 6:10:00               | 1.7                       | 19.9                              | 0.3                  |
| <i>Pago Pago, American Samoa</i>         | 84                         | Fiji                                 | 4.7                                      | 1/15/2022  | 5:20:00               | 1.8                       | 12.7                              | 0.2                  |
| <i>Apia, American Samoa</i>              | 129                        | Fiji                                 | 4.7                                      | 1/15/2022  | 5:20:00               | 2.7                       | 8.8                               | 0.2                  |
| <i>Christmas, Kiribati</i>               | 54                         | Kwajalein                            | 1.1                                      | 1/15/2022  | 7:42:00               | 4.9                       | 26.1                              | 1.3                  |
| <i>Hilo, HI, USA</i>                     | 110                        | Hilo                                 | 1.1                                      | 1/15/2022  | 8:54:00               | 10.0                      | 20.3                              | 2.0                  |
| <i>Kawaihae, HI, USA</i>                 | 80                         | Kawaihae                             | 0.8                                      | 1/15/2022  | 8:54:00               | 10.0                      | 28.0                              | 2.8                  |
| <i>Kahului, HI, USA</i>                  | 100                        | Kahului                              | 1.2                                      | 1/15/2022  | 9:00:00               | 8.3                       | 19.4                              | 1.6                  |
| <i>Honolulu, HI, USA</i>                 | 60                         | Honolulu                             | 1.0                                      | 1/15/2022  | 9:00:00               | 6.0                       | 26.0                              | 1.6                  |
| <i>Barbers Point, HI, USA</i>            | 130                        | Honolulu                             | 1.0                                      | 1/15/2022  | 9:00:00               | 13.0                      | 21.4                              | 2.8                  |
| <i>Nawiliwili, HI, USA</i>               | 30                         | Nawiliwili                           | 1.1                                      | 1/15/2022  | 9:00:00               | 2.7                       | 38.2                              | 1.0                  |
| <i>French Frigate Shoals, HI, USA</i>    | 40                         | Nawiliwili                           | 1.1                                      | 1/15/2022  | 9:00:00               | 3.6                       | 30.9                              | 1.1                  |
| <i>Johnston Island, USA</i>              | 40                         | Kawaihae                             | 0.8                                      | 1/15/2022  | 8:54:00               | 5.0                       | 35.3                              | 1.8                  |
| <i>Midway, Island, USA</i>               | 50                         | Midway                               | 1.2                                      | 1/15/2022  | 9:18:00               | 3.3                       | 26.0                              | 1.1                  |
| <i>Rarotonga, Cook Islands</i>           | 99                         | Easter                               | 1.8                                      | 1/15/2022  | 10:28:00              | 5.6                       | 15.0                              | 0.8                  |
| <i>Tubuai, Austral Islands</i>           | 60                         | Easter                               | 1.8                                      | 1/15/2022  | 10:28:00              | 3.3                       | 19.9                              | 0.7                  |
| <i>Huahine Island, French Polynesia</i>  | 55                         | Easter                               | 1.8                                      | 1/15/2022  | 10:28:00              | 3.1                       | 21.3                              | 0.7                  |
| <i>Papeete, Tahiti, French Polynesia</i> | 216                        | Easter                               | 1.8                                      | 1/15/2022  | 10:28:00              | 12.0                      | 12.0                              | 1.4                  |
| <i>Vairao, Tahiti, French Polynesia</i>  | 35                         | Easter                               | 1.8                                      | 1/15/2022  | 10:28:00              | 1.9                       | 30.6                              | 0.6                  |
| <i>Rikitea, French Polynesia</i>         | 38                         | Easter                               | 1.8                                      | 1/15/2022  | 10:28:00              | 2.1                       | 28.6                              | 0.6                  |
| <i>Nuku Hiva, French Polynesia</i>       | 129                        | Easter                               | 1.8                                      | 1/15/2022  | 10:28:00              | 7.2                       | 13.6                              | 1.0                  |
| <i>Hiva Oa, French Polynesia</i>         | 91                         | Easter                               | 1.8                                      | 1/15/2022  | 10:28:00              | 5.1                       | 15.6                              | 0.8                  |
| <i>Juan Fernandez Island, Chile</i>      | 39                         | Easter                               | 1.8                                      | 1/15/2022  | 10:28:00              | 2.2                       | 27.7                              | 0.6                  |
| <i>Wake Island, USA</i>                  | 50                         | Wake                                 | 1.3                                      | 1/15/2022  | 8:42:00               | 3.8                       | 25.2                              | 1.0                  |
| <i>Kwajalein Island, USA</i>             | 50                         | Kwajalein                            | 1.1                                      | 1/15/2022  | 7:42:00               | 4.5                       | 27.1                              | 1.2                  |
| <i>Chuuk, Micronesia</i>                 | 23                         | Kwajalein                            | 1.1                                      | 1/15/2022  | 7:42:00               | 2.1                       | 47.6                              | 1.0                  |
| <i>Nauru</i>                             | 27                         | Kwajalein                            | 1.1                                      | 1/15/2022  | 7:42:00               | 2.5                       | 41.4                              | 1.0                  |

|                                          |     |               |     |           |          |      |       |      |
|------------------------------------------|-----|---------------|-----|-----------|----------|------|-------|------|
| <i>Saipan Island, USA</i>                | 32  | Guam          | 1.1 | 1/15/2022 | 9:30:00  | 2.9  | 36.5  | 1.0  |
| <i>Pago Bay, Guam, USA</i>               | 80  | Guam          | 1.1 | 1/15/2022 | 9:30:00  | 7.3  | 22.1  | 1.6  |
| <i>Apra Harbor, Guam, USA</i>            | 30  | Guam          | 1.1 | 1/15/2022 | 9:30:00  | 2.7  | 38.1  | 1.0  |
| <i>Chichijima Island, Japan</i>          | 108 | Chichijima    | 1.1 | 1/15/2022 | 10:40:00 | 9.9  | 20.4  | 2.0  |
| <i>Naha, Japan</i>                       | 78  | Naha          | 0.4 | 1/15/2022 | 11:30:00 | 19.5 | 51.6  | 10.0 |
| <i>Ishigaki, Japan</i>                   | 35  | Ishigaki      | 0.8 | 1/15/2022 | 11:40:00 | 4.4  | 38.1  | 1.7  |
| <i>Nikol'skoe, Russia</i>                | 19  | Atka          | 1.0 | 1/15/2022 | 11:36:00 | 1.9  | 57.0  | 1.1  |
| <i>Vodopadnaya, Russia</i>               | 144 | Atka          | 1.0 | 1/15/2022 | 11:36:00 | 14.4 | 21.2  | 3.1  |
| <i>Preobrazheniye, Russia</i>            | 79  | Hakodate      | 0.9 | 1/15/2022 | 11:50:00 | 8.8  | 25.6  | 2.2  |
| <i>Rudnaya Pristan, Russia</i>           | 133 | Hakodate      | 0.9 | 1/15/2022 | 11:50:00 | 14.8 | 23.5  | 3.5  |
| <i>Abashiri, Japan</i>                   | 73  | Abashiri      | 0.7 | 1/15/2022 | 11:50:00 | 10.4 | 31.7  | 3.3  |
| <i>Hanasaki, Japan</i>                   | 205 | Hanasaki      | 1.3 | 1/15/2022 | 11:50:00 | 15.7 | 16.1  | 2.5  |
| <i>Kushiro, Japan</i>                    | 143 | Kushiro       | 1.0 | 1/15/2022 | 11:50:00 | 14.3 | 21.2  | 3.0  |
| <i>Hakodate, Japan</i>                   | 51  | Hakodate      | 0.9 | 1/15/2022 | 11:50:00 | 5.6  | 29.6  | 1.7  |
| <i>Ofunato, Japan</i>                    | 165 | Ofunato       | 0.8 | 1/15/2022 | 11:40:00 | 20.6 | 25.7  | 5.3  |
| <i>Mera, Japan</i>                       | 124 | Mera          | 0.6 | 1/15/2022 | 11:20:00 | 20.7 | 34.3  | 7.1  |
| <i>Omaezaki, Japan</i>                   | 130 | Omaezaki      | 1.0 | 1/15/2022 | 11:30:00 | 13.1 | 21.4  | 2.8  |
| <i>Kushimoto, Japan</i>                  | 209 | Kushimoto     | 0.6 | 1/15/2022 | 11:30:00 | 34.8 | 33.7  | 11.7 |
| <i>Tosashimizu, Japan</i>                | 111 | Tosashimizu   | 1.0 | 1/15/2022 | 11:40:00 | 11.1 | 21.9  | 2.4  |
| <i>Aburatsu, Japan</i>                   | 127 | Aburatsu      | 1.0 | 1/15/2022 | 11:40:00 | 12.8 | 21.5  | 2.7  |
| <i>Nagasaki, Japan</i>                   | 92  | Nagasaki      | 0.6 | 1/15/2022 | 11:50:00 | 15.3 | 35.1  | 5.4  |
| <i>Davao, Philippines</i>                | 69  | Guam          | 1.2 | 1/15/2022 | 9:30:00  | 5.8  | 22.0  | 1.3  |
| <i>Spring Bay, Australia</i>             | 48  | SpringBay     | 2.0 | 1/15/2022 | 8:08:00  | 2.4  | 23.2  | 0.6  |
| <i>Port Kembla, Australia</i>            | 91  | GreenCape     | 1.8 | 1/15/2022 | 7:47:00  | 5.1  | 15.6  | 0.8  |
| <i>Twofold Bay, Australia</i>            | 181 | GreenCape     | 1.8 | 1/15/2022 | 7:47:00  | 10.1 | 12.4  | 1.3  |
| <i>Gold Coast, Australia</i>             | 189 | GoldCoast     | 2.0 | 1/15/2022 | 7:18:00  | 9.5  | 11.3  | 1.1  |
| <i>Norfolk Island, Australia</i>         | 102 | NorfolkIsland | 3.4 | 1/15/2022 | 6:09:00  | 3.0  | 11.4  | 0.3  |
| <i>Torres Strait, Australia</i>          | 6   | HornIsland    | 1.7 | 1/15/2022 | 8:31:00  | 0.4  | 167.1 | 0.6  |
| <i>Esperance, Australia</i>              | 89  | Esperance     | 1.0 | 1/15/2022 | 9:55:00  | 8.9  | 23.0  | 2.0  |
| <i>Portland, Australia</i>               | 21  | PortlandAU    | 1.2 | 1/15/2022 | 8:25:00  | 1.8  | 50.8  | 0.9  |
| <i>North Cape, New Zealand</i>           | 207 | Kerikeri      | 3.2 | 1/15/2022 | 6:10:00  | 6.5  | 7.9   | 0.5  |
| <i>Great Barrier Island, New Zealand</i> | 93  | Kerikeri      | 3.2 | 1/15/2022 | 6:10:00  | 2.9  | 12.5  | 0.4  |
| <i>Auckland, New Zealand</i>             | 19  | Auckland      | 1.2 | 1/15/2022 | 6:20:00  | 1.6  | 54.9  | 0.9  |
| <i>Manakau, New Zealand</i>              | 72  | Auckland      | 1.2 | 1/15/2022 | 6:20:00  | 6.0  | 21.7  | 1.3  |
| <i>Tauranga, New Zealand</i>             | 51  | Whakatane     | 1.3 | 1/15/2022 | 6:20:00  | 3.9  | 24.8  | 1.0  |
| <i>East Cape, New Zealand</i>            | 80  | Whakatane     | 1.3 | 1/15/2022 | 6:20:00  | 6.2  | 19.8  | 1.2  |
| <i>Gisborne, New Zealand</i>             | 46  | Gisborne      | 2.5 | 1/15/2022 | 6:20:00  | 1.8  | 23.2  | 0.4  |
| <i>Napier, New Zealand</i>               | 90  | Napier        | 1.2 | 1/15/2022 | 6:30:00  | 7.5  | 20.1  | 1.5  |
| <i>Castlepoint, New Zealand</i>          | 36  | Wellington    | 0.9 | 1/15/2022 | 6:40:00  | 3.9  | 35.9  | 1.4  |
| <i>Wellington, New Zealand</i>           | 41  | Wellington    | 0.9 | 1/15/2022 | 6:40:00  | 4.6  | 33.0  | 1.5  |
| <i>Kaikoura, New Zealand</i>             | 47  | Wellington    | 0.9 | 1/15/2022 | 6:40:00  | 5.2  | 30.9  | 1.6  |

|                                            |     |                |     |           |          |      |      |     |
|--------------------------------------------|-----|----------------|-----|-----------|----------|------|------|-----|
| <i>Christchurch, New Zealand</i>           | 65  | Christchurch   | 1.4 | 1/15/2022 | 7:00:00  | 4.6  | 20.9 | 1.0 |
| <i>Puysegur Welcome Bay, New Zealand</i>   | 53  | MilfordSound   | 2.2 | 1/15/2022 | 7:10:00  | 2.4  | 21.1 | 0.5 |
| <i>Jackson Bay, New Zealand</i>            | 61  | MilfordSound   | 2.2 | 1/15/2022 | 7:10:00  | 2.8  | 18.8 | 0.5 |
| <i>Dog Island, New Zealand</i>             | 30  | Dunedin        | 1.3 | 1/15/2022 | 7:10:00  | 2.3  | 36.2 | 0.8 |
| <i>Green Island, New Zealand</i>           | 40  | Dunedin        | 1.3 | 1/15/2022 | 7:10:00  | 3.2  | 29.2 | 0.9 |
| <i>Westgate Port Taranaki, New Zealand</i> | 67  | Wanganui       | 2.4 | 1/15/2022 | 6:30:00  | 2.8  | 17.0 | 0.5 |
| <i>Timaru, New Zealand</i>                 | 35  | Dunedin        | 1.3 | 1/15/2022 | 7:10:00  | 2.8  | 32.2 | 0.9 |
| <i>Moturiki, New Zealand</i>               | 187 | Whakatane      | 1.3 | 1/15/2022 | 6:20:00  | 14.4 | 16.3 | 2.3 |
| <i>Little Kaiteriteri, New Zealand</i>     | 16  | Richmond       | 0.9 | 1/15/2022 | 6:40:00  | 1.8  | 67.6 | 1.2 |
| <i>Base Prat, Antarctica</i>               | 12  | PuertoWilliams | 0.9 | 1/15/2022 | 12:34:00 | 1.3  | 86.4 | 1.1 |
| <i>Base O'Higgins, Antarctica</i>          | 13  | PuertoWilliams | 0.9 | 1/15/2022 | 12:34:00 | 1.4  | 79.1 | 1.2 |
| <i>King Edward Point, Sandwich Islands</i> | 27  | PuertoWilliams | 0.9 | 1/15/2022 | 12:34:00 | 3.2  | 43.5 | 1.3 |
| <i>Castro, Chile</i>                       | 25  | PuertoMelinka  | 0.9 | 1/15/2022 | 12:33:00 | 2.9  | 45.3 | 1.3 |
| <i>Ancud, Chile</i>                        | 53  | PuertoMelinka  | 0.9 | 1/15/2022 | 12:33:00 | 5.9  | 29.1 | 1.7 |
| <i>Bahia Mansa, Chile</i>                  | 76  | Corral         | 1.1 | 1/15/2022 | 12:48:00 | 6.9  | 22.4 | 1.6 |
| <i>Corral, Chile</i>                       | 51  | Corral         | 1.1 | 1/15/2022 | 12:48:00 | 4.6  | 26.8 | 1.2 |
| <i>Lebu, Chile</i>                         | 44  | Corral         | 1.1 | 1/15/2022 | 12:48:00 | 4.0  | 29.1 | 1.2 |
| <i>Coronel, Chile</i>                      | 102 | Corral         | 1.1 | 1/15/2022 | 12:48:00 | 9.3  | 20.7 | 1.9 |
| <i>Talcahuano, Chile</i>                   | 59  | Concepcion     | 1.5 | 1/15/2022 | 12:58:00 | 3.9  | 21.5 | 0.9 |
| <i>Quiriquina, Chile</i>                   | 88  | Concepcion     | 1.5 | 1/15/2022 | 12:58:00 | 5.9  | 17.5 | 1.0 |
| <i>Constitucion, Chile</i>                 | 66  | Concepcion     | 1.5 | 1/15/2022 | 12:58:00 | 4.4  | 20.2 | 0.9 |
| <i>San Antonio, Chile</i>                  | 49  | SanAntonio     | 1.4 | 1/15/2022 | 13:15:00 | 3.6  | 24.8 | 0.9 |
| <i>Valparaiso, Chile</i>                   | 70  | Valparaiso     | 1.5 | 1/15/2022 | 13:16:00 | 4.7  | 19.5 | 0.9 |
| <i>Quintero, Chile</i>                     | 80  | Valparaiso     | 1.5 | 1/15/2022 | 13:16:00 | 5.3  | 18.3 | 1.0 |
| <i>Pichidangui, Chile</i>                  | 62  | Valparaiso     | 1.5 | 1/15/2022 | 13:16:00 | 4.1  | 21.0 | 0.9 |
| <i>Coquimbo, Chile</i>                     | 84  | Coquimbo       | 1.5 | 1/15/2022 | 13:28:00 | 5.5  | 17.8 | 1.0 |
| <i>Huasco, Chile</i>                       | 54  | Coquimbo       | 1.5 | 1/15/2022 | 13:28:00 | 3.6  | 22.8 | 0.8 |
| <i>Caldera, Chile</i>                      | 111 | Coquimbo       | 1.5 | 1/15/2022 | 13:28:00 | 7.4  | 16.1 | 1.2 |
| <i>Chañaral, Chile</i>                     | 74  | Coquimbo       | 1.5 | 1/15/2022 | 13:28:00 | 4.9  | 19.0 | 0.9 |
| <i>Taltal, Chile</i>                       | 72  | Coquimbo       | 1.5 | 1/15/2022 | 13:28:00 | 4.9  | 19.2 | 0.9 |
| <i>Paposo, Chile</i>                       | 78  | Coquimbo       | 1.5 | 1/15/2022 | 13:28:00 | 5.3  | 18.5 | 1.0 |
| <i>Antofagasta, Chile</i>                  | 68  | Iquique        | 1.8 | 1/15/2022 | 14:02:00 | 3.8  | 18.4 | 0.7 |
| <i>Mejillones, Chile</i>                   | 153 | Iquique        | 1.8 | 1/15/2022 | 14:02:00 | 8.6  | 12.9 | 1.1 |
| <i>Tocopilla, Chile</i>                    | 77  | Iquique        | 1.8 | 1/15/2022 | 14:02:00 | 4.3  | 17.1 | 0.7 |
| <i>Patache, Chile</i>                      | 116 | Iquique        | 1.8 | 1/15/2022 | 14:02:00 | 6.4  | 14.1 | 0.9 |
| <i>Iquique, Chile</i>                      | 93  | Iquique        | 1.8 | 1/15/2022 | 14:02:00 | 5.2  | 15.5 | 0.8 |
| <i>Pisagua, Chile</i>                      | 84  | Arica          | 1.7 | 1/15/2022 | 14:08:00 | 4.9  | 16.8 | 0.8 |
| <i>Arica, Chile</i>                        | 162 | Arica          | 1.7 | 1/15/2022 | 14:08:00 | 9.5  | 13.3 | 1.3 |
| <i>Matarami, Peru</i>                      | 91  | Arica          | 1.7 | 1/15/2022 | 14:08:00 | 5.4  | 16.1 | 0.9 |
| <i>Callao, Peru</i>                        | 127 | Arica          | 1.7 | 1/15/2022 | 14:08:00 | 7.4  | 14.2 | 1.1 |
| <i>San Diego, CA, USA</i>                  | 20  | SanDiego       | 0.5 | 1/15/2022 | 11:54:00 | 4.0  | 63.4 | 2.6 |

|                                     |     |               |     |           |          |      |      |      |
|-------------------------------------|-----|---------------|-----|-----------|----------|------|------|------|
| <i>Los Angeles, CA, USA</i>         | 90  | LosAngeles    | 0.5 | 1/15/2022 | 11:54:00 | 18.0 | 41.5 | 7.5  |
| <i>Santa Monica, CA, USA</i>        | 100 | SantaMonica   | 0.4 | 1/15/2022 | 11:54:00 | 25.0 | 51.0 | 12.8 |
| <i>Santa Barbara, CA, USA</i>       | 50  | SantaBarbara  | 0.5 | 1/15/2022 | 11:54:00 | 10.0 | 44.7 | 4.5  |
| <i>Port San Luis, CA, USA</i>       | 90  | PortSanLuis   | 0.6 | 1/15/2022 | 11:54:00 | 15.0 | 35.1 | 5.3  |
| <i>Monterey, CA, USA</i>            | 90  | Monterrey     | 0.8 | 1/15/2022 | 12:00:00 | 11.3 | 27.4 | 3.1  |
| <i>San Francisco, CA, USA</i>       | 40  | SanFrancisco  | 0.6 | 1/15/2022 | 12:06:00 | 6.7  | 41.6 | 2.8  |
| <i>Alameda, CA, USA</i>             | 20  | SanFrancisco  | 0.6 | 1/15/2022 | 12:06:00 | 3.3  | 59.6 | 2.0  |
| <i>Richmond, CA, USA</i>            | 30  | SanFrancisco  | 0.6 | 1/15/2022 | 12:06:00 | 5.0  | 47.1 | 2.4  |
| <i>Point Reyes, CA, USA</i>         | 80  | Point Reyes   | 0.5 | 1/15/2022 | 12:06:00 | 16.0 | 41.9 | 6.7  |
| <i>Arena Cove, CA, USA</i>          | 100 | ArenaCove     | 0.6 | 1/15/2022 | 12:02:00 | 16.7 | 34.8 | 5.8  |
| <i>North Spit, CA, USA</i>          | 110 | North Spit    | 0.5 | 1/15/2022 | 12:06:00 | 22.0 | 41.0 | 9.0  |
| <i>Crescent City, CA, USA</i>       | 130 | CrescentCity  | 1.0 | 1/15/2022 | 12:11:00 | 13.0 | 21.4 | 2.8  |
| <i>Port Orford, OR, USA</i>         | 70  | PortOrford    | 0.4 | 1/15/2022 | 12:12:00 | 17.5 | 52.0 | 9.1  |
| <i>Charleston, OR, USA</i>          | 60  | CharlestonOR  | 0.6 | 1/15/2022 | 12:12:00 | 10.0 | 37.3 | 3.7  |
| <i>South Beach, OR, USA</i>         | 60  | SouthBeachOR  | 0.6 | 1/15/2022 | 12:18:00 | 10.0 | 37.3 | 3.7  |
| <i>Garibaldi, OR, USA</i>           | 90  | Garibaldi     | 0.6 | 1/15/2022 | 12:24:00 | 15.0 | 35.1 | 5.3  |
| <i>Toke Point, WA, USA</i>          | 30  | TokePoint     | 0.7 | 1/15/2022 | 12:24:00 | 4.3  | 44.0 | 1.9  |
| <i>Westport, WA, USA</i>            | 50  | Westport      | 0.5 | 1/15/2022 | 12:24:00 | 10.0 | 44.7 | 4.5  |
| <i>La Push, WA USA</i>              | 130 | LaPush        | 0.4 | 1/15/2022 | 12:24:00 | 32.5 | 50.6 | 16.5 |
| <i>Neah Bay, WA, USA</i>            | 40  | NeahBay       | 0.4 | 1/15/2022 | 12:30:00 | 10.0 | 55.9 | 5.6  |
| <i>Port Angeles, WA, USA</i>        | 40  | PortAngeles   | 0.7 | 1/15/2022 | 12:30:00 | 5.7  | 37.9 | 2.2  |
| <i>Victoria Harbour, BC, Canada</i> | 33  | NeahBay       | 0.4 | 1/15/2022 | 12:30:00 | 8.3  | 58.3 | 4.9  |
| <i>Tofino, BC, Canada</i>           | 52  | NeahBay       | 0.4 | 1/15/2022 | 12:30:00 | 13.3 | 53.5 | 7.0  |
| <i>Port Alberni, BC, Canada</i>     | 30  | NeahBay       | 0.4 | 1/15/2022 | 12:30:00 | 7.5  | 60.2 | 4.5  |
| <i>Winter Harbour, BC, Canada</i>   | 27  | NeahBay       | 0.4 | 1/15/2022 | 12:30:00 | 6.8  | 62.6 | 4.2  |
| <i>Henslung Cove, BC, Canada</i>    | 66  | Sitka         | 0.4 | 1/15/2022 | 12:42:00 | 16.5 | 52.3 | 8.6  |
| <i>Port Alexander, AK, USA</i>      | 70  | PortAlexander | 0.4 | 1/15/2022 | 12:41:00 | 17.5 | 52.0 | 9.1  |
| <i>Sitka, AK, USA</i>               | 40  | Sitka         | 0.4 | 1/15/2022 | 12:42:00 | 10.0 | 55.8 | 5.6  |
| <i>Elfin Cove, AK, USA</i>          | 70  | ElfinCove     | 0.4 | 1/15/2022 | 12:48:00 | 17.5 | 52.0 | 9.1  |
| <i>Juneau, AK, USA</i>              | 20  | Juneau        | 0.4 | 1/15/2022 | 12:48:00 | 5.0  | 70.8 | 3.5  |
| <i>Skagway, AK, USA</i>             | 40  | Skagway       | 0.4 | 1/15/2022 | 12:54:00 | 10.0 | 55.8 | 5.6  |
| <i>Yakutat, AK, USA</i>             | 120 | Yakutat       | 0.5 | 1/15/2022 | 12:54:00 | 24.0 | 40.9 | 9.8  |
| <i>Seward, AK, USA</i>              | 30  | Seward        | 0.7 | 1/15/2022 | 12:54:00 | 4.3  | 43.9 | 1.9  |
| <i>Altiak, AK, USA</i>              | 30  | Altiak        | 1.0 | 1/15/2022 | 12:24:00 | 3.0  | 38.8 | 1.2  |
| <i>Sand Point, AK, USA</i>          | 30  | SandPoint     | 0.9 | 1/15/2022 | 12:06:00 | 3.3  | 40.3 | 1.3  |
| <i>King Cove, AK, USA</i>           | 100 | KingCove      | 0.7 | 1/15/2022 | 12:00:00 | 14.3 | 30.3 | 4.3  |
| <i>Unalaska, AK, USA</i>            | 30  | Unalaska      | 0.5 | 1/15/2022 | 11:48:00 | 6.0  | 52.1 | 3.1  |
| <i>Nikolski, AK, USA</i>            | 40  | Nikolski      | 0.8 | 1/15/2022 | 11:42:00 | 5.0  | 35.4 | 1.8  |
| <i>Atka, AK, USA</i>                | 20  | Atka          | 0.9 | 1/15/2022 | 11:36:00 | 2.2  | 54.3 | 1.2  |
| <i>Adak, AK, USA</i>                | 100 | Adak          | 0.5 | 1/15/2022 | 11:30:00 | 20.0 | 41.2 | 8.2  |
| <i>St. Paul Island, AK, USA</i>     | 60  | StPaul        | 0.9 | 1/15/2022 | 12:06:00 | 6.7  | 27.8 | 1.9  |

|                                      |     |         |     |           |          |      |       |     |
|--------------------------------------|-----|---------|-----|-----------|----------|------|-------|-----|
| <i>Cadiz, Spain</i>                  | 53  | ISPRA17 | 1.3 | 1/15/2022 | 20:35:00 | 4.1  | 24.3  | 1.0 |
| <i>Saidia Marina, Morocco</i>        | 42  | ISPRA17 | 1.3 | 1/15/2022 | 20:35:00 | 3.2  | 28.1  | 0.9 |
| <i>Sete, France</i>                  | 41  | ISPRA13 | 1.0 | 1/15/2022 | 20:09:00 | 4.1  | 31.8  | 1.3 |
| <i>Fos-Sur-Mer, France</i>           | 52  | ISPRA13 | 1.0 | 1/15/2022 | 20:09:00 | 5.2  | 27.8  | 1.4 |
| <i>Toulon, France</i>                | 26  | ISPRA13 | 1.0 | 1/17/2022 | 20:09:00 | 2.8  | 43.8  | 1.1 |
| <i>La Figueirette, France</i>        | 29  | ISPRA13 | 1.0 | 1/15/2022 | 20:09:00 | 2.9  | 40.1  | 1.2 |
| <i>Fontvieille Harbour, Monaco</i>   | 8   | ISPRA13 | 1.0 | 1/15/2022 | 20:09:00 | 0.8  | 130.3 | 1.0 |
| <i>Centuri, Corsica</i>              | 47  | ISPRA14 | 1.3 | 1/15/2022 | 20:09:00 | 3.6  | 26.4  | 0.9 |
| <i>Ajaccio, Corsica</i>              | 25  | ISPRA14 | 1.3 | 1/15/2022 | 20:09:00 | 1.9  | 43.4  | 0.8 |
| <i>Solenzara, Corsica</i>            | 12  | ISPRA14 | 1.3 | 1/15/2022 | 20:09:00 | 0.9  | 83.3  | 0.8 |
| <i>Ile Rousse, Corsica</i>           | 29  | ISPRA14 | 1.3 | 1/15/2022 | 20:09:00 | 2.2  | 37.8  | 0.8 |
| <i>Carloforte, Sardinia</i>          | 57  | ISPRA17 | 1.3 | 1/15/2022 | 20:35:00 | 4.4  | 23.4  | 1.0 |
| <i>Cagliari, Sardinia</i>            | 48  | ISPRA17 | 1.3 | 1/15/2022 | 20:35:00 | 3.8  | 25.8  | 1.0 |
| <i>La Spezia, Italy</i>              | 10  | ISPRA14 | 1.3 | 1/15/2022 | 20:09:00 | 0.8  | 100.4 | 0.8 |
| <i>Livorno, Italy</i>                | 52  | ISPRA14 | 1.3 | 1/15/2022 | 20:09:00 | 4.0  | 24.7  | 1.0 |
| <i>Gaeta, Italy</i>                  | 14  | ISPRA37 | 1.4 | 1/15/2022 | 20:16:00 | 1.0  | 72.0  | 0.7 |
| <i>Napoli, Italy</i>                 | 35  | ISPRA03 | 1.2 | 1/15/2022 | 20:16:00 | 3.0  | 32.8  | 1.0 |
| <i>Salerno, Italy</i>                | 59  | ISPRA03 | 1.2 | 1/15/2022 | 20:16:00 | 4.9  | 23.7  | 1.2 |
| <i>Palinuro, Italy</i>               | 30  | ISPRA03 | 1.2 | 1/15/2022 | 20:16:00 | 2.5  | 36.9  | 0.9 |
| <i>Messina, Sicily</i>               | 98  | ISPRA10 | 1.1 | 1/15/2022 | 20:28:00 | 8.9  | 20.9  | 1.9 |
| <i>Palermo, Sicily</i>               | 60  | ISPRA12 | 1.1 | 1/15/2022 | 20:37:00 | 5.5  | 24.6  | 1.4 |
| <i>Sciacca, Sicily</i>               | 64  | ISPRA12 | 1.1 | 1/15/2022 | 20:37:00 | 5.8  | 23.9  | 1.4 |
| <i>Porto Empedocle, Sicily</i>       | 81  | ISPRA16 | 1.1 | 1/15/2022 | 20:36:00 | 7.4  | 22.0  | 1.6 |
| <i>Catania, Sicily</i>               | 106 | ISPRA10 | 1.1 | 1/15/2022 | 20:28:00 | 9.6  | 20.5  | 2.0 |
| <i>Lampedusa, Italy</i>              | 44  | ISPRA11 | 1.5 | 1/15/2022 | 20:47:00 | 3.0  | 26.2  | 0.8 |
| <i>Crotone, Italy</i>                | 52  | ISPRA08 | 1.2 | 1/15/2022 | 20:21:00 | 4.3  | 25.4  | 1.1 |
| <i>Taranto, Italy</i>                | 29  | ISPRA15 | 1.2 | 1/16/2022 | 0:06:00  | 2.4  | 38.8  | 0.9 |
| <i>Otranto, Italy</i>                | 27  | ISPRA15 | 1.2 | 1/16/2022 | 0:06:00  | 2.3  | 40.8  | 0.9 |
| <i>Vieste, Italy</i>                 | 90  | ISPRA05 | 0.7 | 1/17/2022 | 9:21:00  | 12.9 | 30.7  | 3.9 |
| <i>Ortona, Italy</i>                 | 71  | ISPRA05 | 0.7 | 1/17/2022 | 9:21:00  | 10.1 | 31.9  | 3.2 |
| <i>S.Benedetto Del Tronto, Italy</i> | 84  | ISPRA05 | 0.7 | 1/17/2022 | 9:21:00  | 12.0 | 31.0  | 3.7 |
| <i>Stari Grad, Croatia</i>           | 54  | ISPRA05 | 0.7 | 1/17/2022 | 9:21:00  | 7.7  | 34.0  | 2.6 |
| <i>Peiraias, Greece</i>              | 24  | ISPRA15 | 0.7 | 1/16/2022 | 0:06:00  | 3.4  | 50.9  | 1.7 |
| <i>Syros, Greece</i>                 | 10  | ISPRA15 | 1.2 | 1/16/2022 | 0:06:00  | 0.8  | 101.4 | 0.8 |
| <i>Plimiri, Greece (NOA-02)</i>      | 54  | ISPRA15 | 1.2 | 1/16/2022 | 0:06:00  | 4.5  | 24.9  | 1.1 |
| <i>Ierapetra, Crete (NOA-04)</i>     | 53  | ISPRA15 | 1.2 | 1/16/2022 | 0:06:00  | 4.4  | 25.1  | 1.1 |
| <i>Itea, Greece (NOA-05)</i>         | 34  | ISPRA15 | 1.2 | 1/16/2022 | 0:06:00  | 2.8  | 33.9  | 1.0 |
| <i>Aigio, Greece (NOA-06)</i>        | 18  | ISPRA15 | 1.2 | 1/16/2022 | 0:06:00  | 1.5  | 58.3  | 0.9 |
| <i>Zakynthos, Greece (NOA-07)</i>    | 33  | ISPRA15 | 1.2 | 1/16/2022 | 0:06:00  | 2.8  | 34.6  | 1.0 |
| <i>Kerykya, Greece (NOA-11)</i>      | 60  | ISPRA15 | 1.2 | 1/16/2022 | 0:06:00  | 5.0  | 23.6  | 1.2 |
| <i>Bodrum, Turkey</i>                | 32  | ISPRA15 | 1.2 | 1/16/2022 | 0:06:00  | 2.7  | 35.7  | 0.9 |



|                                             |     |                   |     |           |          |      |       |      |
|---------------------------------------------|-----|-------------------|-----|-----------|----------|------|-------|------|
| <i>Marmaris, Turkey</i>                     | 27  | ISPRA15           | 1.2 | 1/16/2022 | 0:06:00  | 2.3  | 40.2  | 0.9  |
| <i>Antalya, Turkey</i>                      | 10  | ISPRA15           | 1.2 | 1/16/2022 | 0:06:00  | 0.8  | 101.2 | 0.8  |
| <i>Tasucu, Turkey</i>                       | 20  | ISPRA15           | 1.2 | 1/16/2022 | 0:06:00  | 1.7  | 52.6  | 0.9  |
| <i>Istanbul, Turkey</i>                     | 39  | ISPRA15           | 1.2 | 1/16/2022 | 0:06:00  | 3.3  | 30.6  | 1.0  |
| <i>Igneada, Turkey</i>                      | 42  | ISPRA15           | 1.2 | 1/16/2022 | 0:06:00  | 3.5  | 28.9  | 1.0  |
| <i>Vieux Fort, St Lucia</i>                 | 133 | B42060            | 0.7 | 1/17/2022 | 3:30:00  | 19.0 | 29.5  | 5.6  |
| <i>Dennerly, St Lucia</i>                   | 52  | B42060            | 1.2 | 1/15/2022 | 15:50:00 | 4.3  | 25.5  | 1.1  |
| <i>Calliaqua, St Vincent and Grenadines</i> | 25  | B42060            | 1.2 | 1/15/2022 | 15:50:00 | 2.1  | 43.1  | 0.9  |
| <i>Fort-de-France, Martinique</i>           | 33  | B42060            | 1.2 | 1/15/2022 | 15:50:00 | 2.8  | 34.6  | 1.0  |
| <i>Deshaiies, Guadeloupe</i>                | 47  | B42060            | 1.2 | 1/15/2022 | 15:50:00 | 3.9  | 27.2  | 1.1  |
| <i>Portsmouth, Dominica</i>                 | 25  | B42060            | 1.2 | 1/15/2022 | 15:50:00 | 2.1  | 43.0  | 0.9  |
| <i>Blowing Point, Anguilla</i>              | 79  | B42060            | 0.7 | 1/16/2022 | 4:30:00  | 11.3 | 31.2  | 3.5  |
| <i>Baharona, Dominican Republic</i>         | 35  | MonaIsland        | 0.4 | 1/17/2022 | 2:48:00  | 8.8  | 57.6  | 5.0  |
| <i>Puerto Plata, Dominican Republic</i>     | 45  | MonaIsland        | 0.4 | 1/16/2022 | 4:49:00  | 11.3 | 54.7  | 6.2  |
| <i>Punta Cana, Dominican Republic</i>       | 79  | MonaIsland        | 0.4 | 1/16/2022 | 4:49:00  | 19.8 | 51.6  | 10.2 |
| <i>Charlotte Amelie, US Virgin Islands</i>  | 91  | CharlotteAmalie   | 0.3 | 1/17/2022 | 3:06:00  | 30.3 | 67.6  | 20.5 |
| <i>Lime Tree Bay, US Virgin Islands</i>     | 36  | LimeTreeBay       | 1.1 | 1/15/2022 | 15:42:00 | 3.3  | 33.2  | 1.1  |
| <i>Mayaguez, Puerto Rico</i>                | 72  | Mayaguez          | 0.5 | 1/16/2022 | 4:48:00  | 14.4 | 42.3  | 6.1  |
| <i>Vieques, Puerto Rico</i>                 | 54  | Mauaguez          | 1.2 | 1/15/2022 | 15:30:00 | 4.5  | 24.8  | 1.1  |
| <i>Salinas, Puerto Rico</i>                 | 29  | Mauaguez          | 1.2 | 1/15/2022 | 15:30:00 | 2.4  | 38.6  | 0.9  |
| <i>Mona Island, Puerto Rico</i>             | 36  | MonaIsland        | 0.7 | 1/15/2022 | 15:24:00 | 5.1  | 40.1  | 2.0  |
| <i>St Johns, Canada</i>                     | 191 | CutlerFarris      | 0.6 | 1/16/2022 | 4:24:00  | 31.8 | 33.7  | 10.7 |
| <i>Port Fourchon, LA, USA</i>               | 50  | GrandIsle         | 0.7 | 1/15/2022 | 13:42:00 | 7.1  | 34.9  | 2.5  |
| <i>Grand Isle, LA, USA</i>                  | 30  | GrandIsle         | 0.7 | 1/15/2022 | 13:42:00 | 4.3  | 43.9  | 1.9  |
| <i>Wrightsville Beach, NC, USA</i>          | 80  | WrightsvilleBeach | 1.1 | 1/16/2022 | 5:24:00  | 7.3  | 22.1  | 1.6  |
| <i>Beaufort, NC, USA</i>                    | 70  | Beaufort          | 1.1 | 1/16/2022 | 5:18:00  | 6.4  | 23.1  | 1.5  |
| <i>Ocean City Inlet, MD, USA</i>            | 60  | OceanCityInlet    | 1.5 | 1/16/2022 | 5:06:00  | 4.0  | 21.3  | 0.9  |
| <i>Lewes, DE, USA</i>                       | 30  | Lewes             | 1.5 | 1/16/2022 | 5:06:00  | 2.0  | 35.9  | 0.7  |
| <i>Cape May, NJ, USA</i>                    | 30  | CapeMay           | 1.5 | 1/16/2022 | 5:06:00  | 2.0  | 35.9  | 0.7  |
| <i>Atlantic City, NJ, USA</i>               | 100 | AtlanticCity      | 1.2 | 1/16/2022 | 5:00:00  | 8.3  | 19.4  | 1.6  |
| <i>Woods Hole, MA, USA</i>                  | 30  | WoodsHole         | 1.2 | 1/16/2022 | 4:42:00  | 2.5  | 37.3  | 0.9  |
| <i>Nantucket, MA, USA</i>                   | 60  | Nantucket         | 0.8 | 1/16/2022 | 4:36:00  | 7.5  | 30.0  | 2.3  |
| <i>Buoy #21420</i>                          | 30  | Kushimoto         | 0.6 | 1/15/2022 | 11:13:00 | 5.0  | 47.1  | 2.4  |
| <i>Buoy #51407</i>                          | 30  | Hilo              | 1.1 | 1/15/2022 | 8:50:00  | 2.7  | 38.0  | 1.0  |
